# Supplementary material for: Real-Word Effectiveness of Global COVID-19 Vaccines Against SARS-CoV-2 Variants: A Systematic Review and Meta-Analysis
Source: PubMed Central journal article supplement (PMC9160927; doi:10.3389/fmed.2022.820544), 2022-05-19

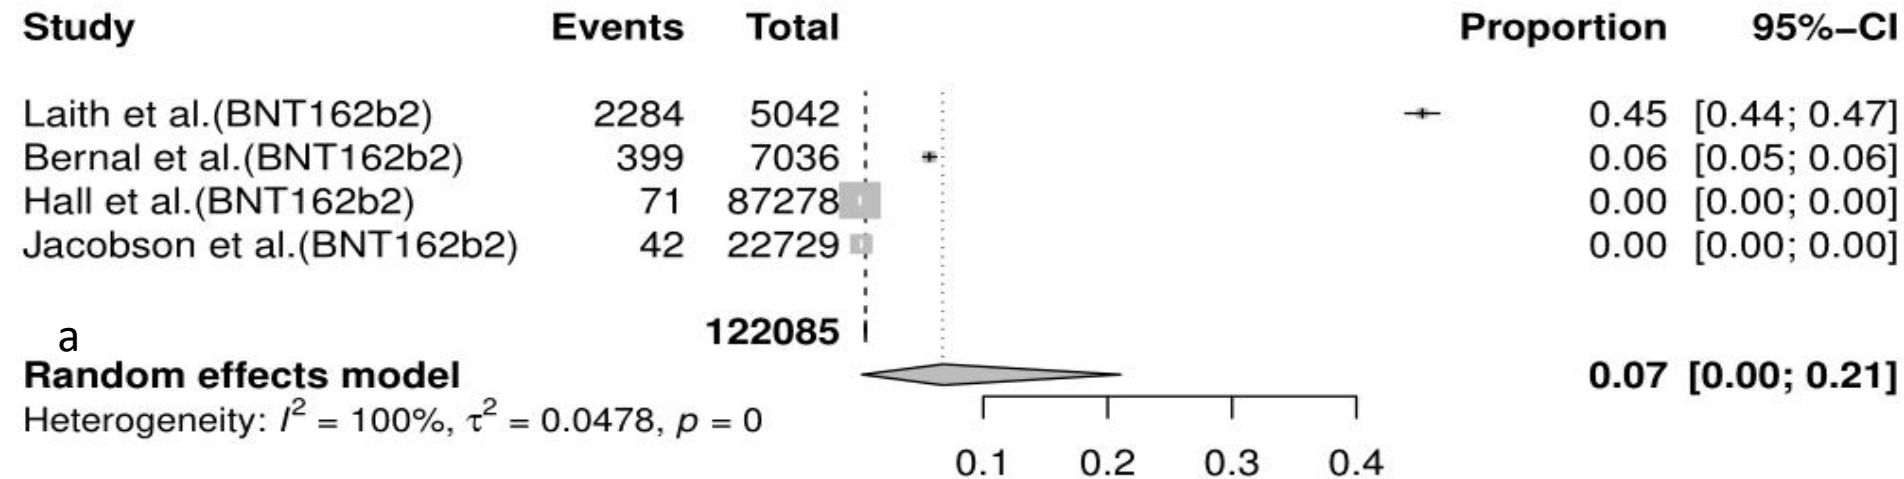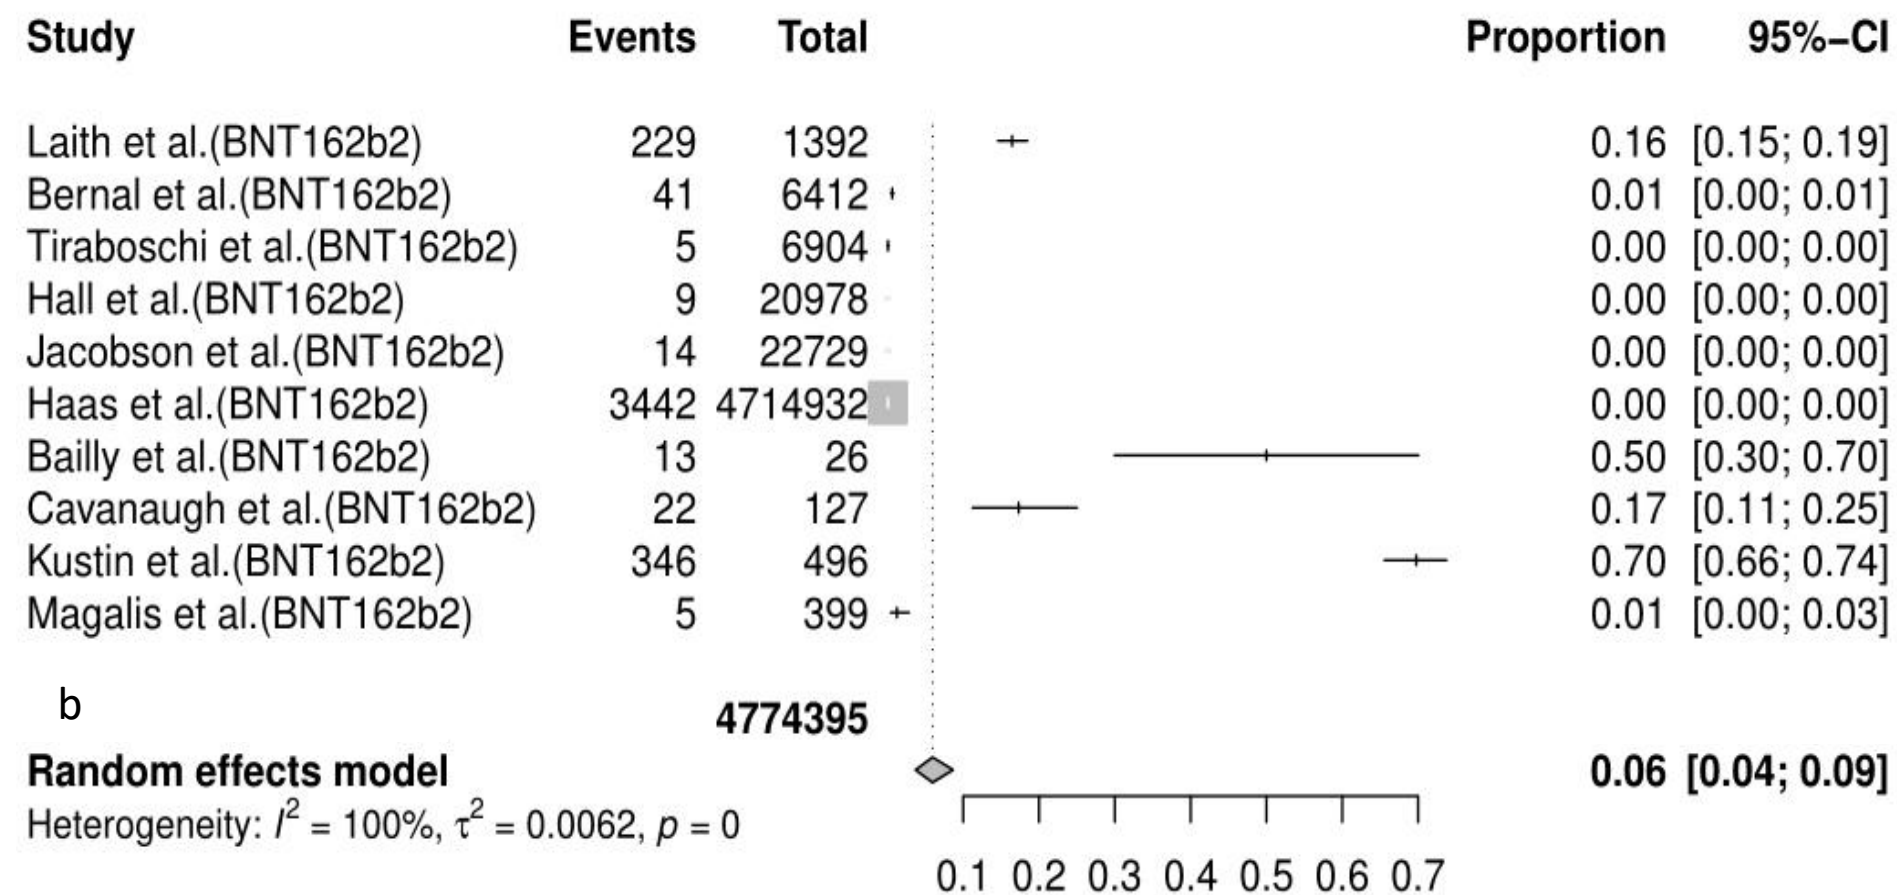

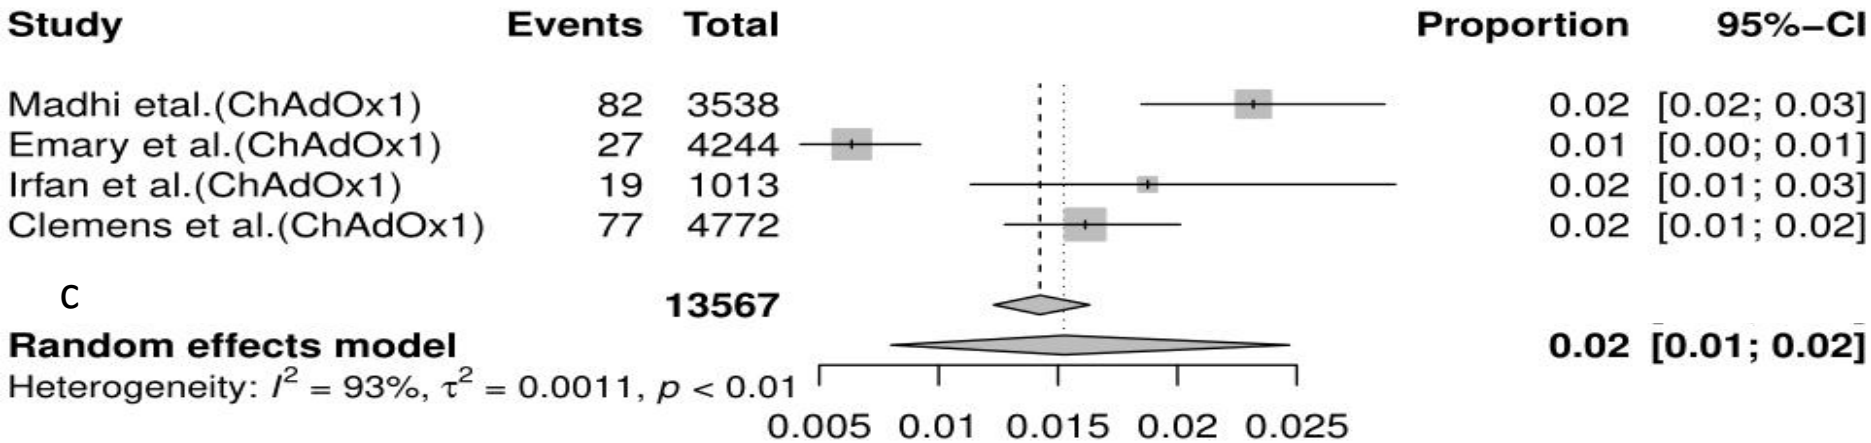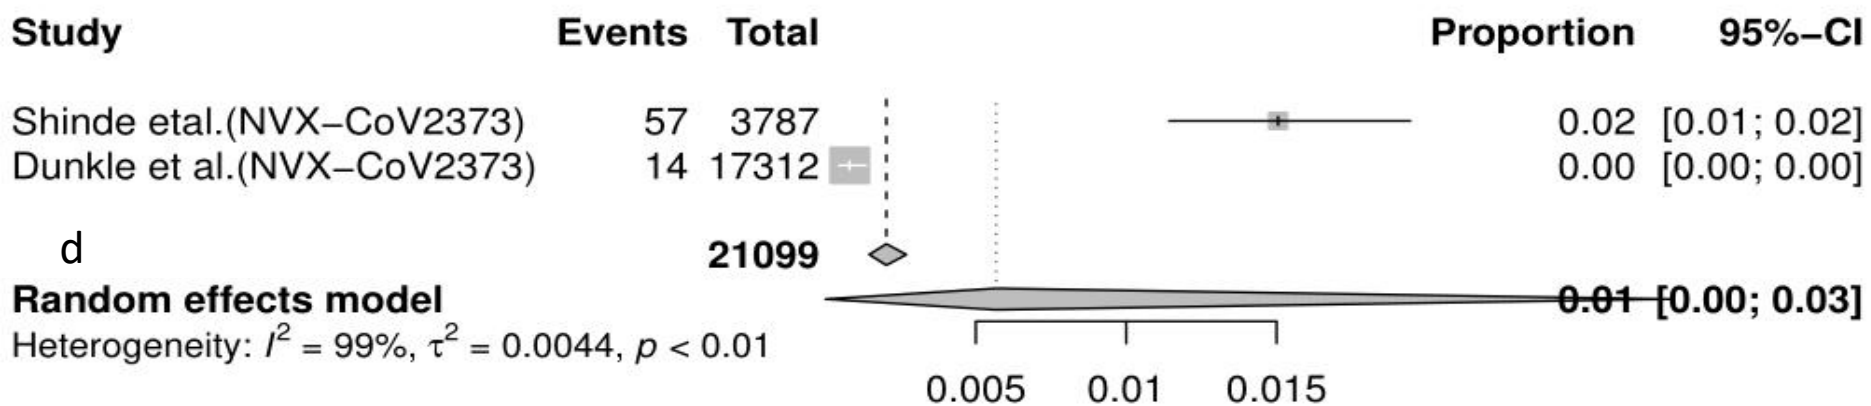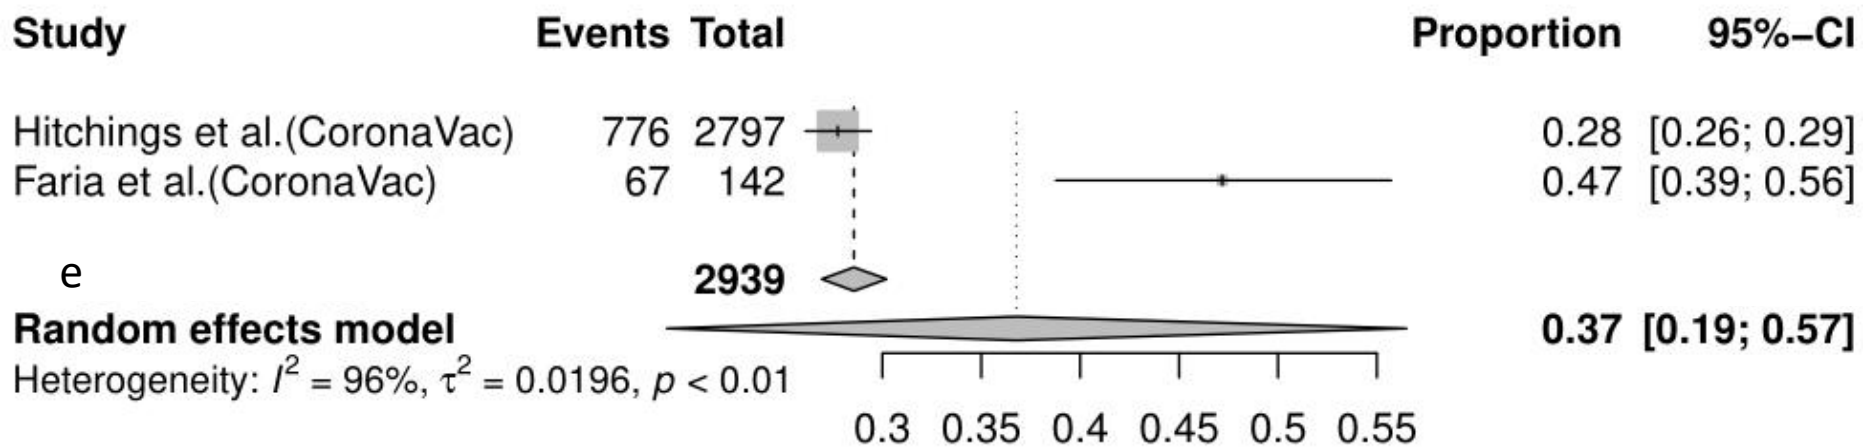

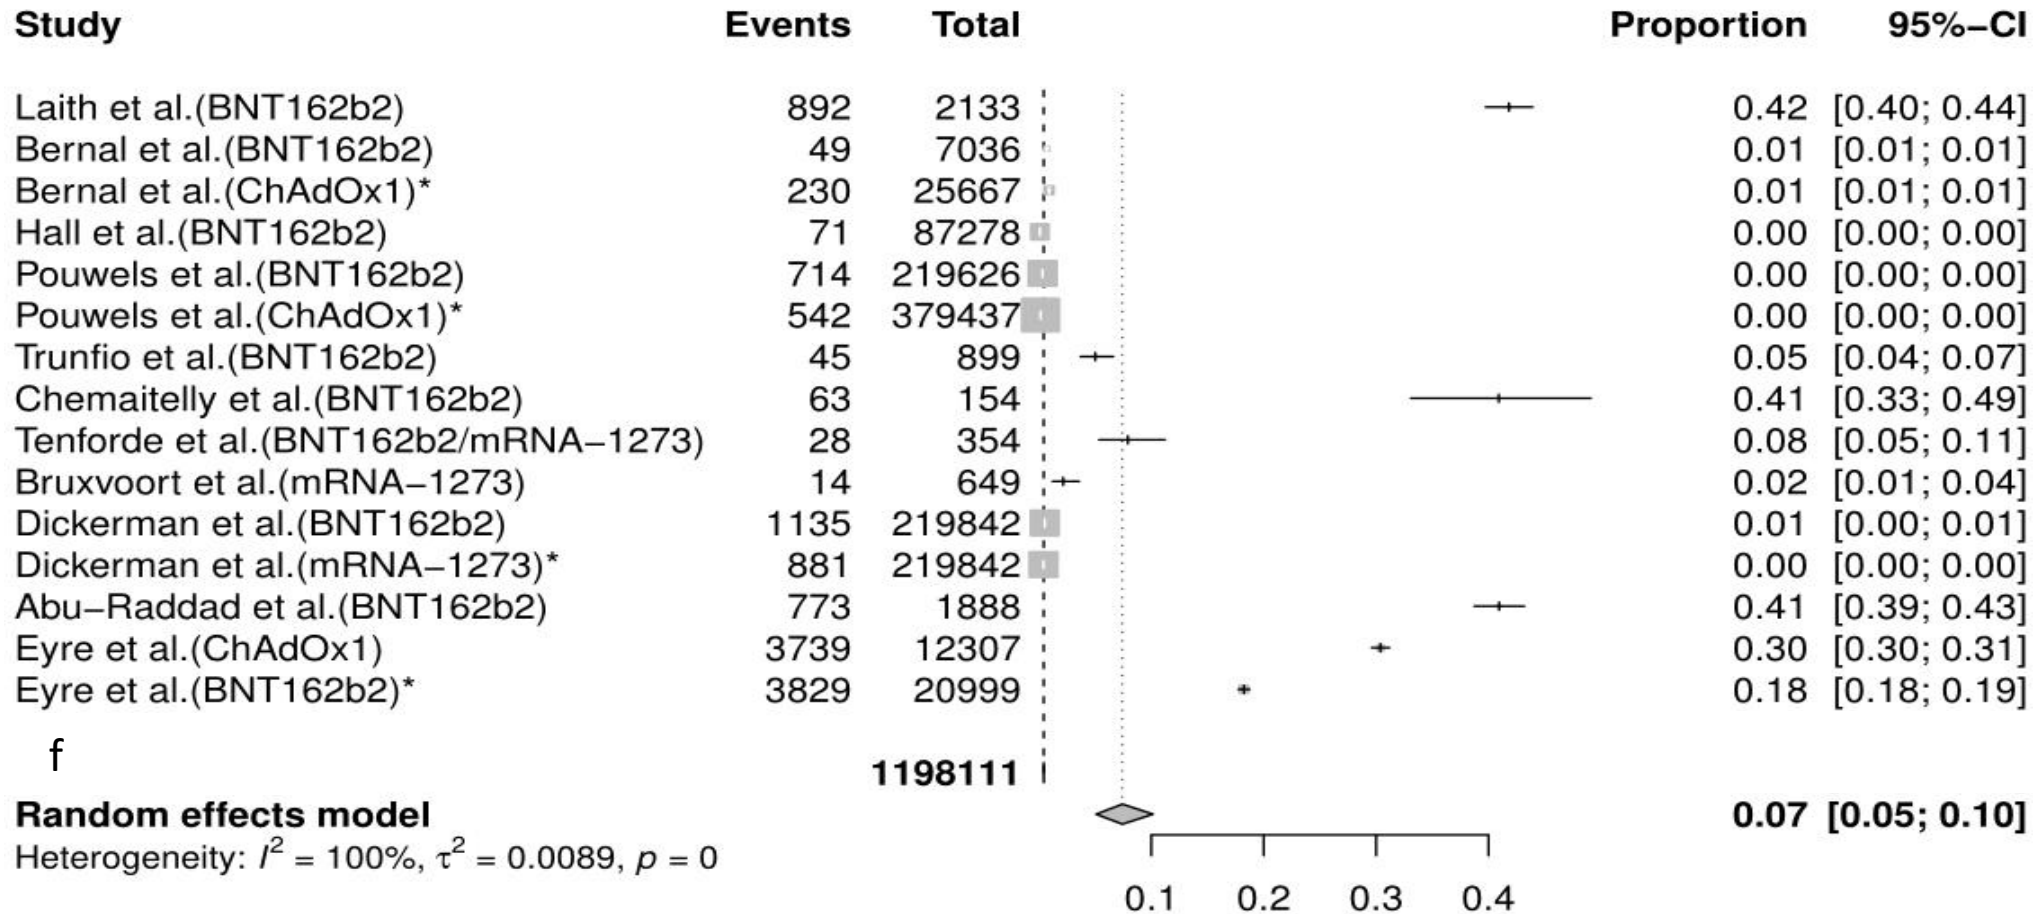

| Study                                         | Events | Total   | Proportion | 95%-CI       |
|-----------------------------------------------|--------|---------|------------|--------------|
| Laith et al.(BNT162b2)                        | 50     | 515     | 0.10       | [0.07; 0.13] |
| Bernal et al.(BNT162b2)                       | 13     | 6412    | 0.00       | [0.00; 0.00] |
| Bernal et al.(ChAdOx1)*                       | 14     | 2071    | 0.01       | [0.00; 0.01] |
| Tiraboschi et al.(BNT162b2)                   | 4      | 6904    | 0.00       | [0.00; 0.00] |
| Hall et al.(BNT162b2)                         | 9      | 20978   | 0.00       | [0.00; 0.00] |
| Haas et al.(BNT162b2)                         | 3442   | 4714932 | 0.00       | [0.00; 0.00] |
| Emary et al.(ChAdOx1)                         | 21     | 4244    | 0.00       | [0.00; 0.01] |
| Kustin et al.(BNT162b2)                       | 344    | 496     | 0.69       | [0.65; 0.73] |
| Magalis et al.(BNT162b2)                      | 1      | 399     | 0.00       | [0.00; 0.01] |
| Faria et al.(CoronaVac)                       | 5      | 142     | 0.04       | [0.01; 0.08] |
| Rovida et al.(BNT162b2)                       | 33     | 3720    | 0.01       | [0.01; 0.01] |
| Pouwels et al.(BNT162b2)                      | 71     | 109237  | 0.00       | [0.00; 0.00] |
| Pouwels et al.(ChAdOx1)*                      | 26     | 65636   | 0.00       | [0.00; 0.00] |
| Trunfio et al.(BNT162b2)                      | 10     | 5901    | 0.00       | [0.00; 0.00] |
| Heath et al.(NVX-CoV2373)                     | 8      | 7020    | 0.00       | [0.00; 0.00] |
| Chemaitelly et al.(BNT162b2)                  | 118    | 532     | 0.22       | [0.19; 0.26] |
| Tenforde et al.(BNT162b2/mRNA-1273)           | 9      | 475     | 0.02       | [0.01; 0.04] |
| Duerr et al.(BNT162b2/mRNA-1273/JNJ-78436735) | 26     | 76      | 0.34       | [0.24; 0.46] |
| Bruxvoort et al.(mRNA-1273)                   | 13     | 1747    | 0.01       | [0.00; 0.01] |
| Dunkle et al.(NVX-CoV2373)                    | 4      | 17312   | 0.00       | [0.00; 0.00] |
| Abu-Raddad et al.(BNT162b2)                   | 50     | 515     | 0.10       | [0.07; 0.13] |
| Eyre et al.(ChAdOx1)                          | 151    | 32363   | 0.00       | [0.00; 0.01] |
| Eyre et al.(BNT162b2)*                        | 337    | 15457   | 0.02       | [0.02; 0.02] |
| Mor et al.(BNT162b2)                          | 584    | 717     | 0.81       | [0.78; 0.84] |

g

5017801

**Random effects model**

Heterogeneity:  $I^2 = 100\%$ ,  $\tau^2 = 0.0032$ ,  $p = 0$

**0.04 [0.03; 0.05]**

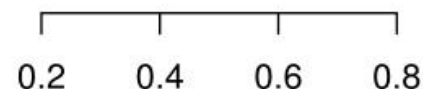

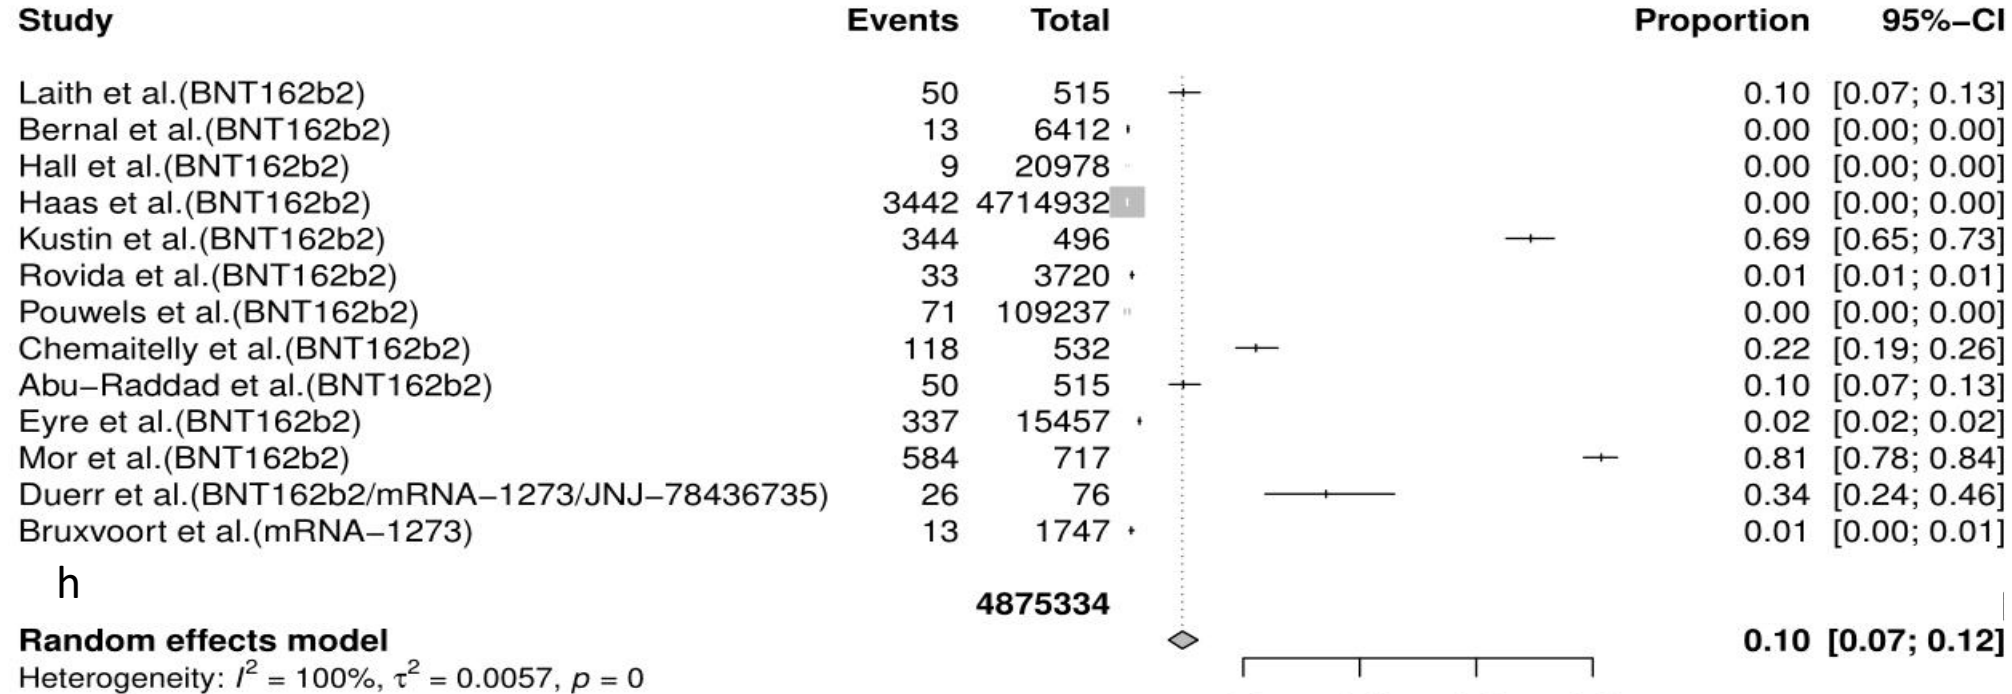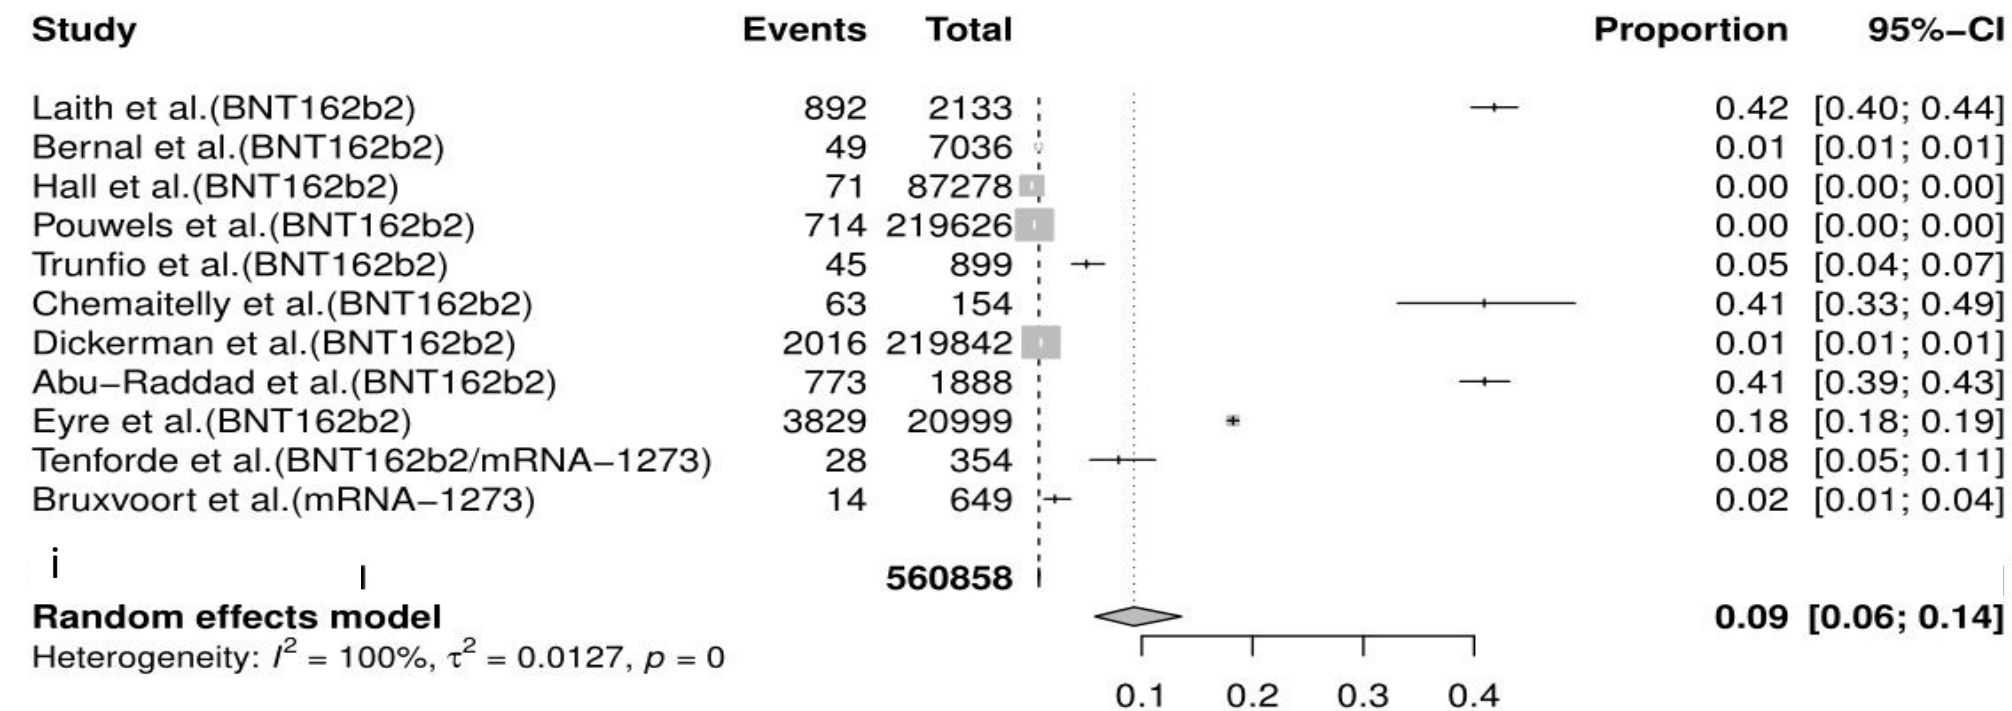

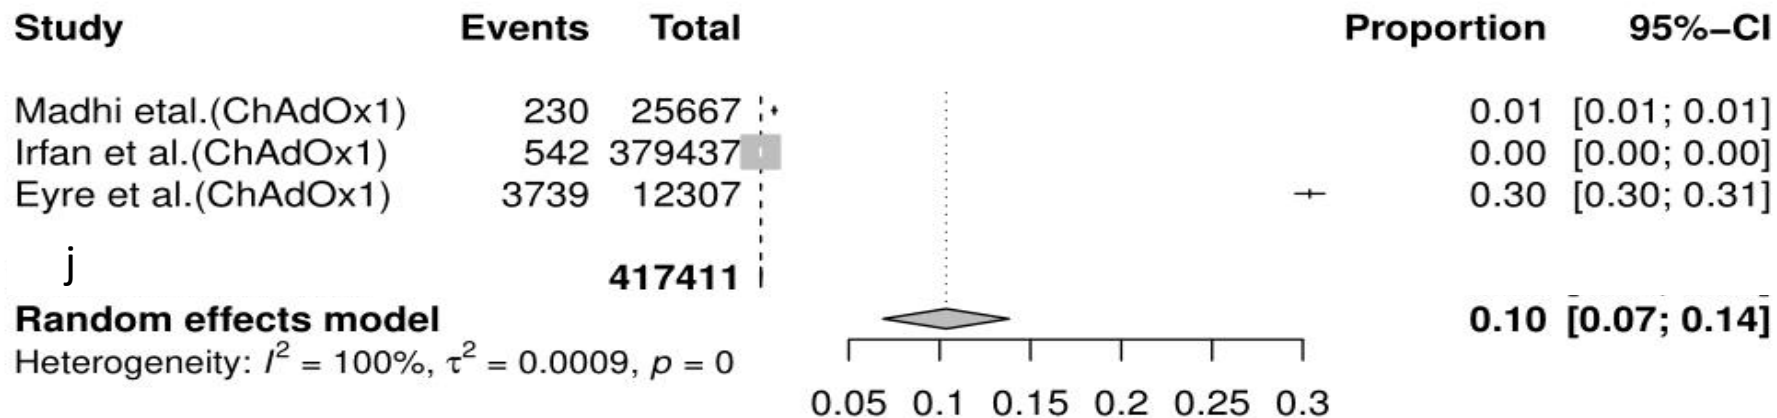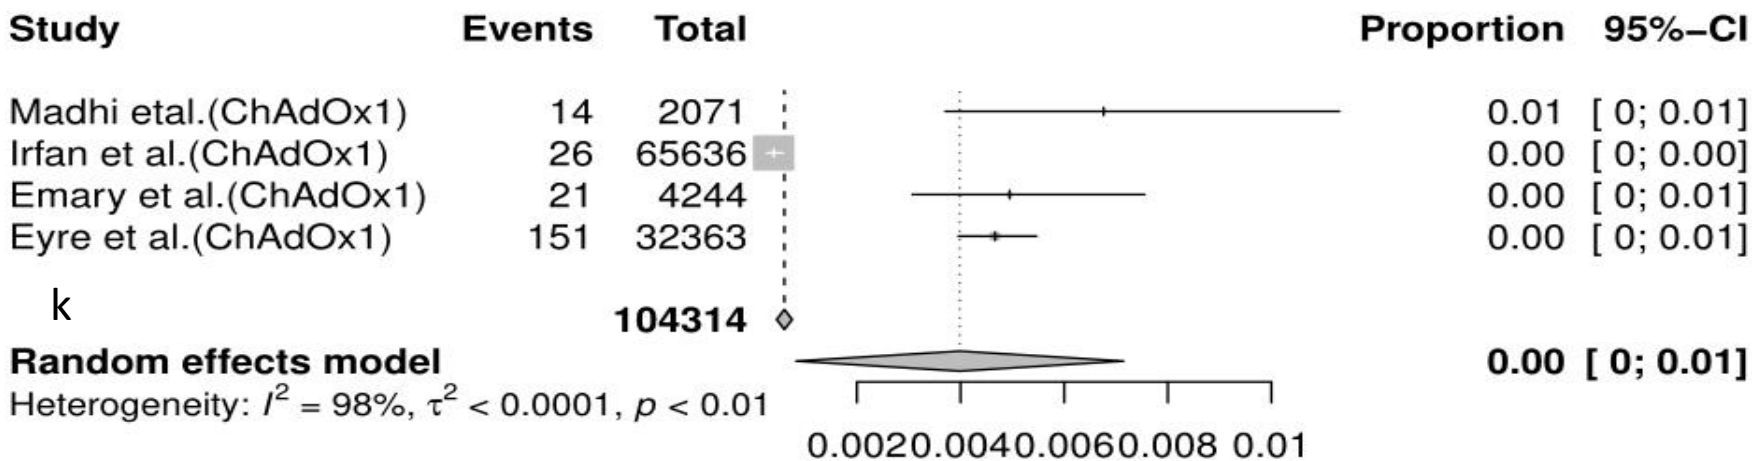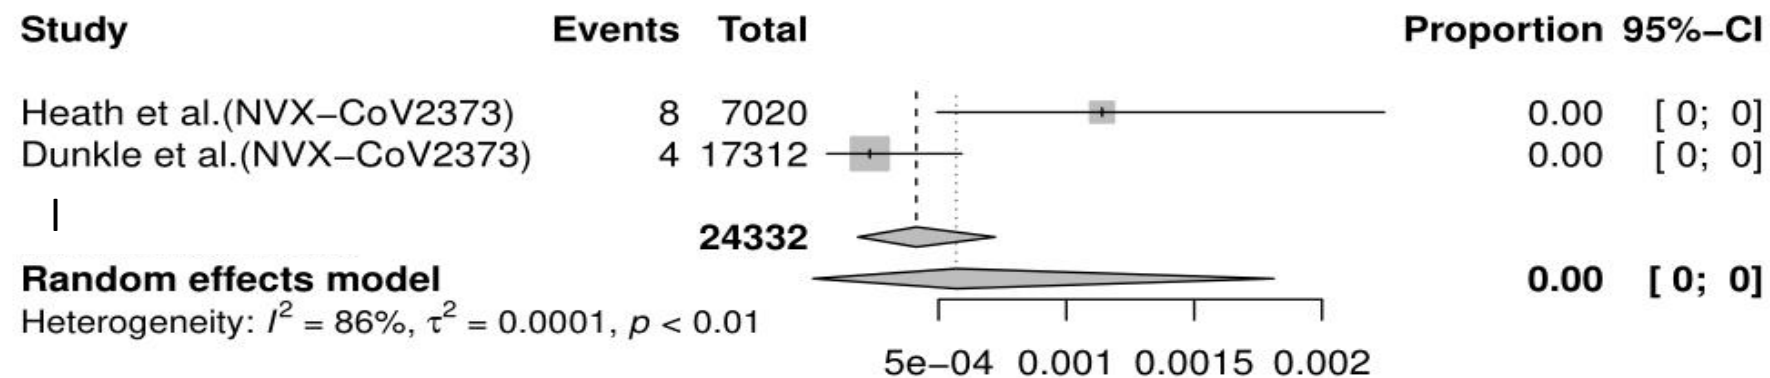

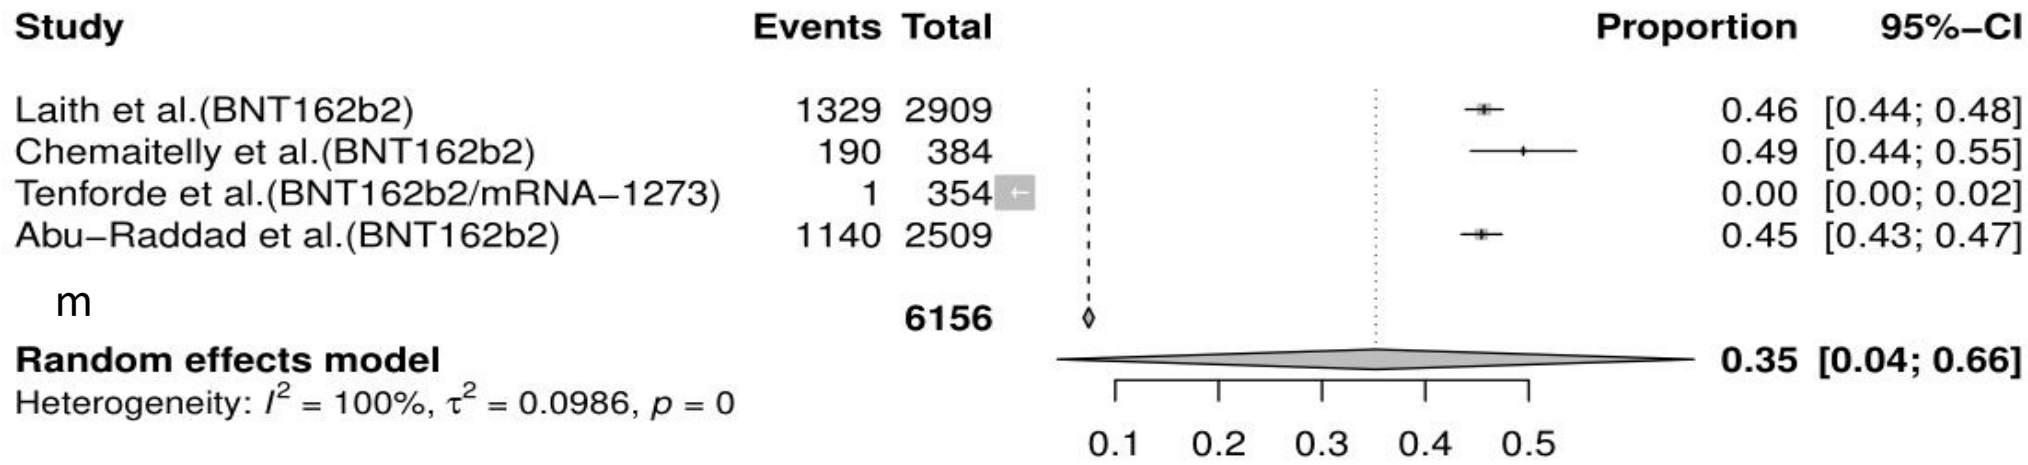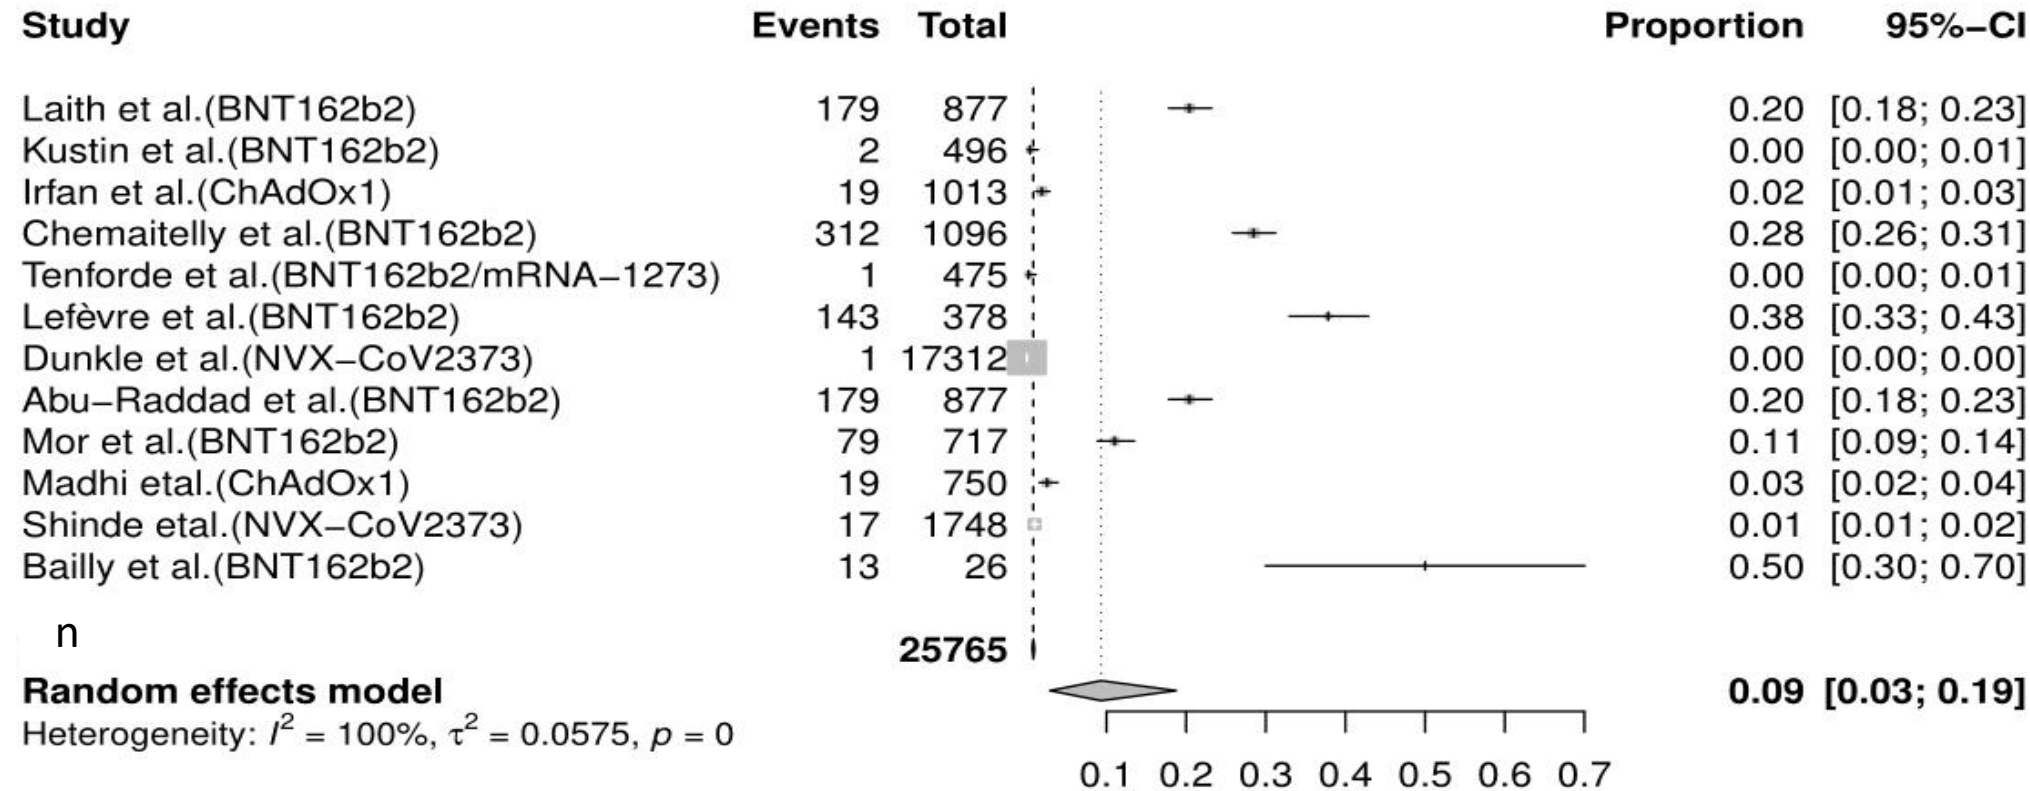

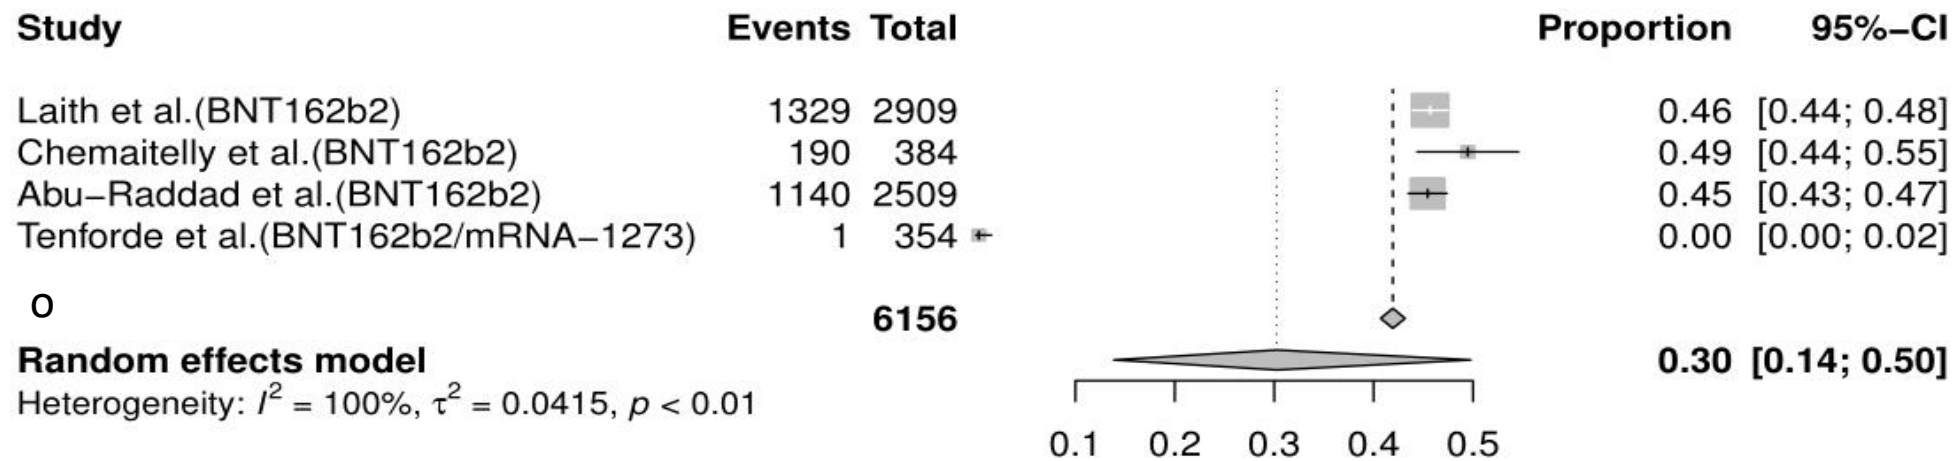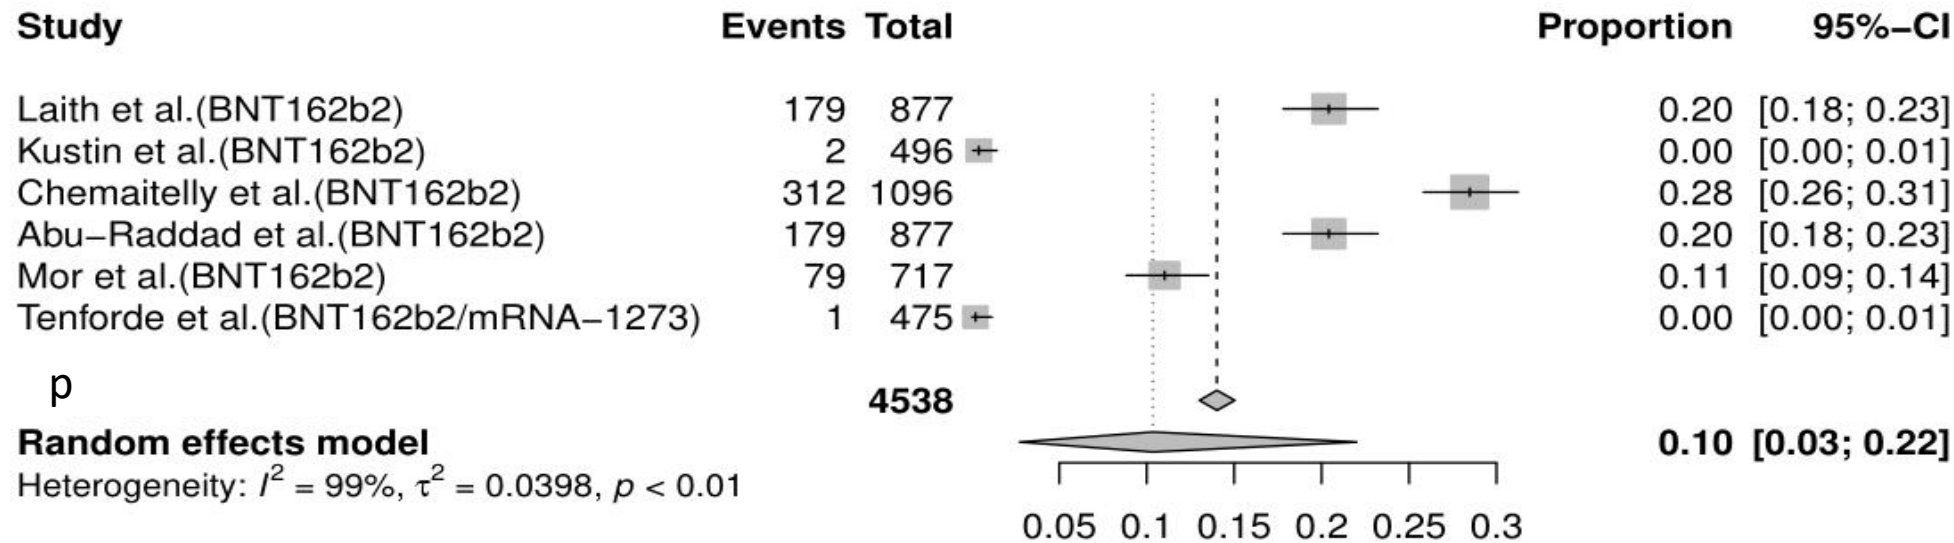



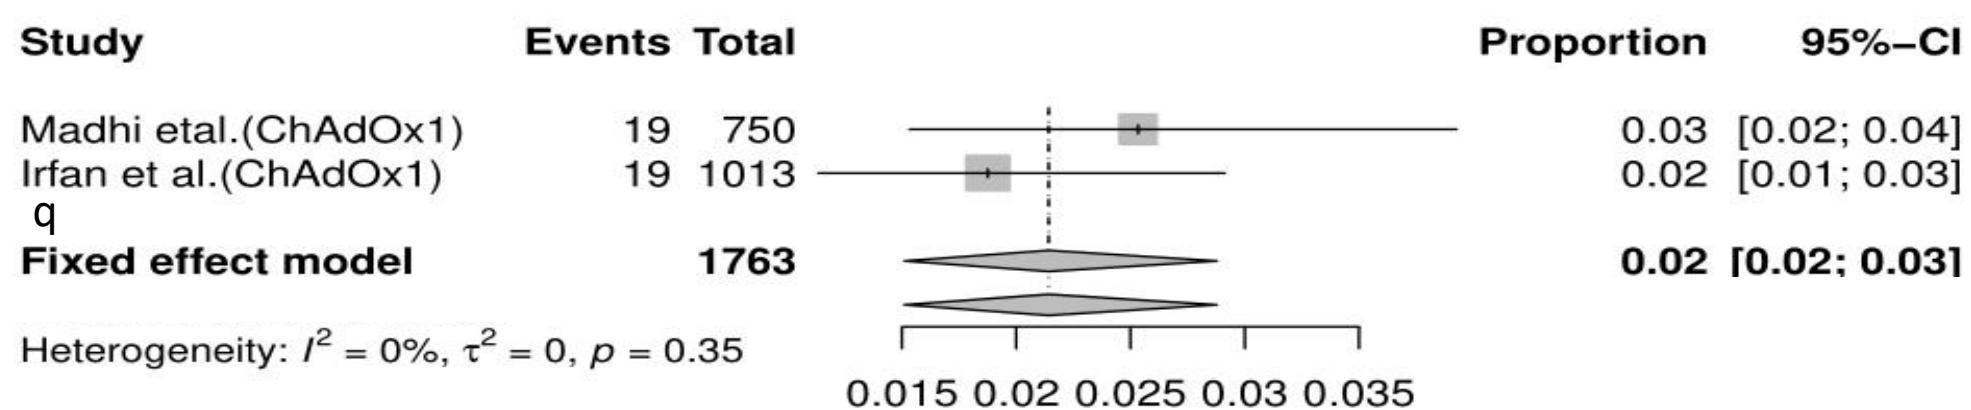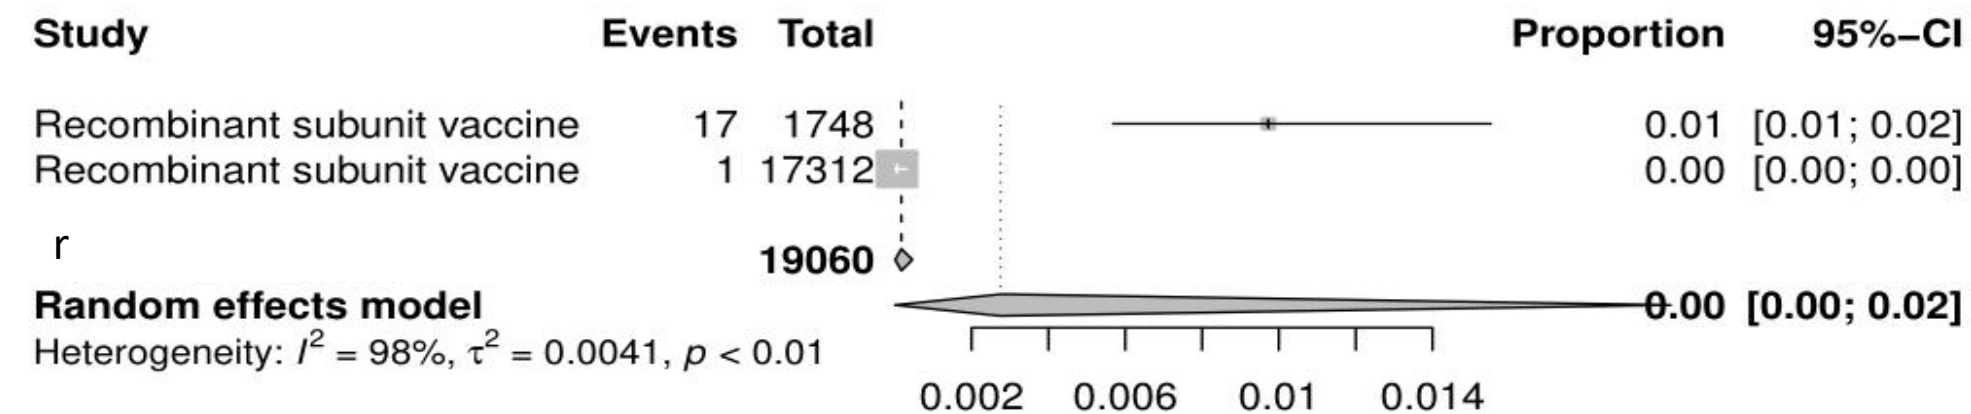

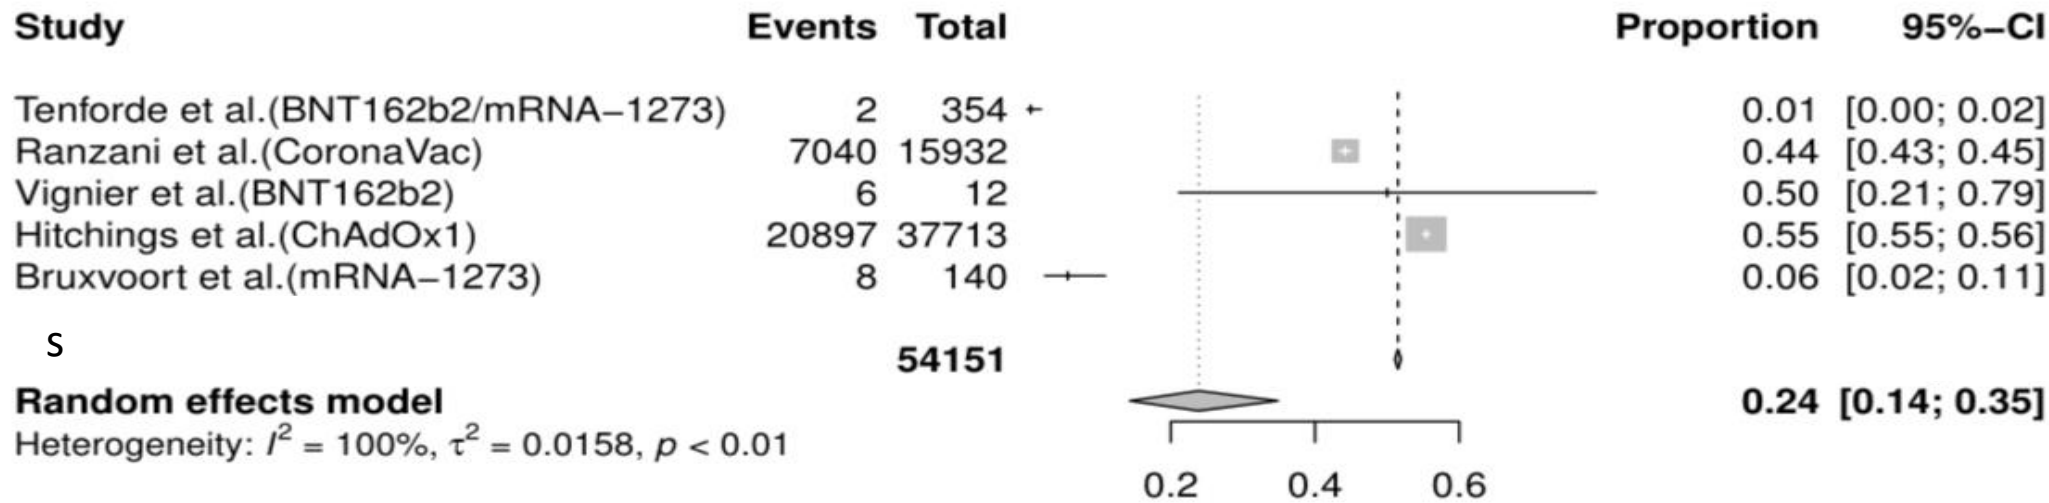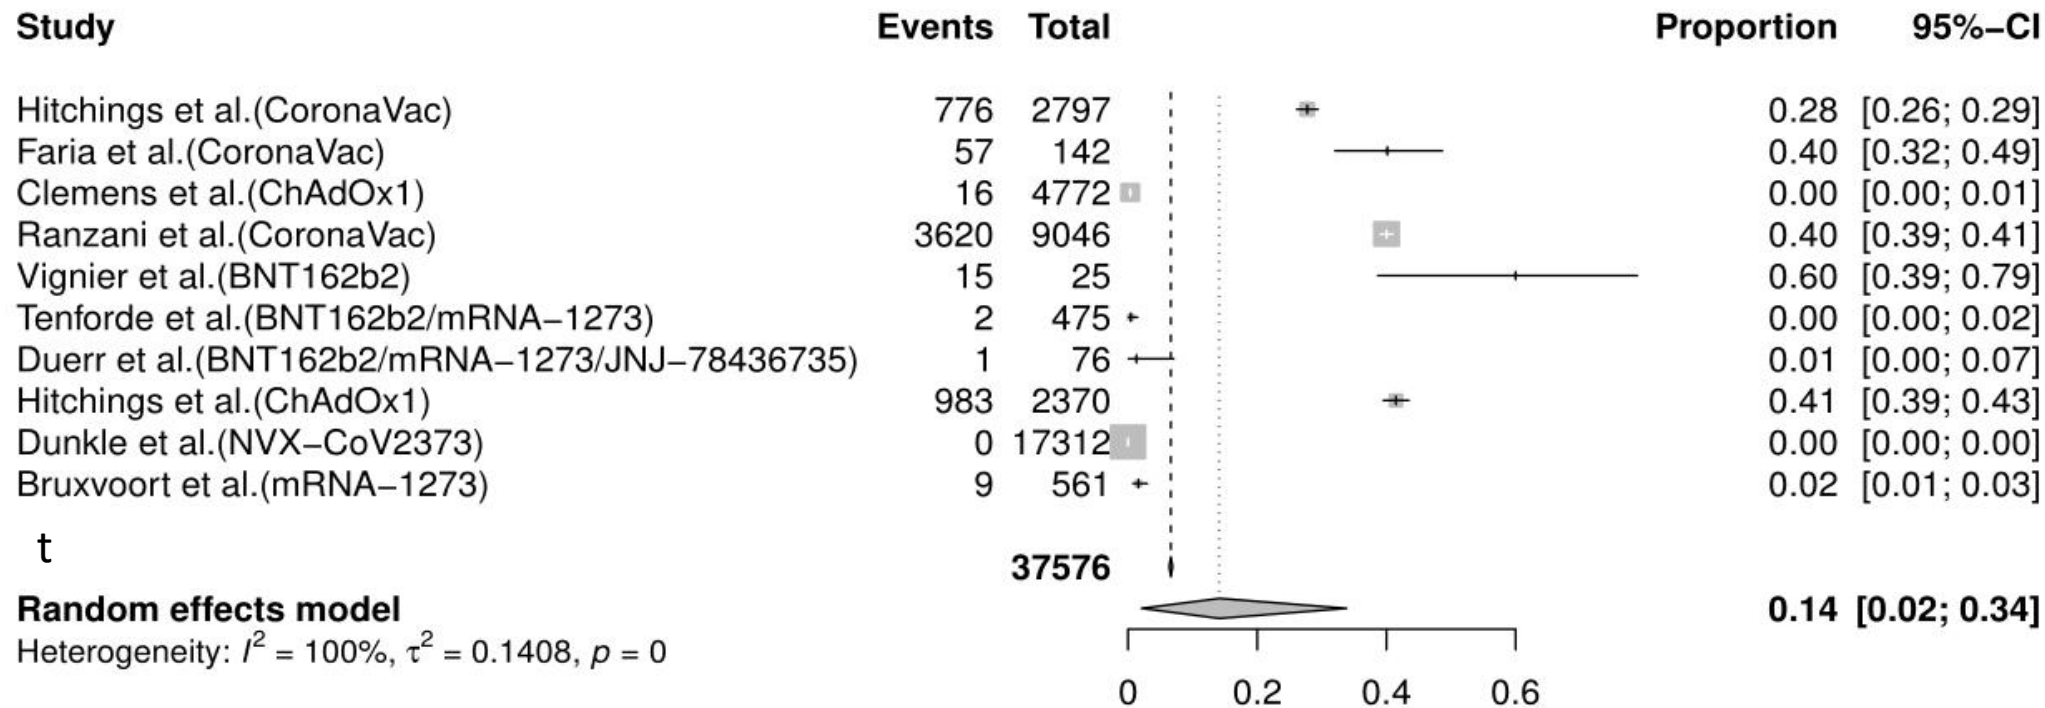

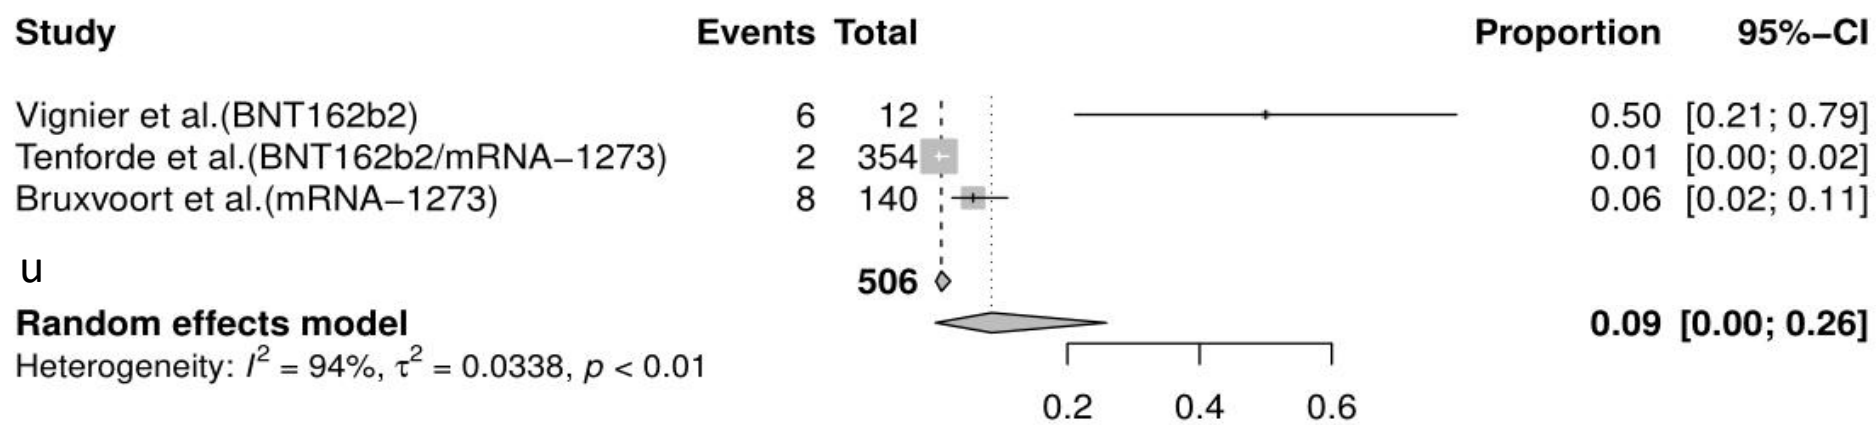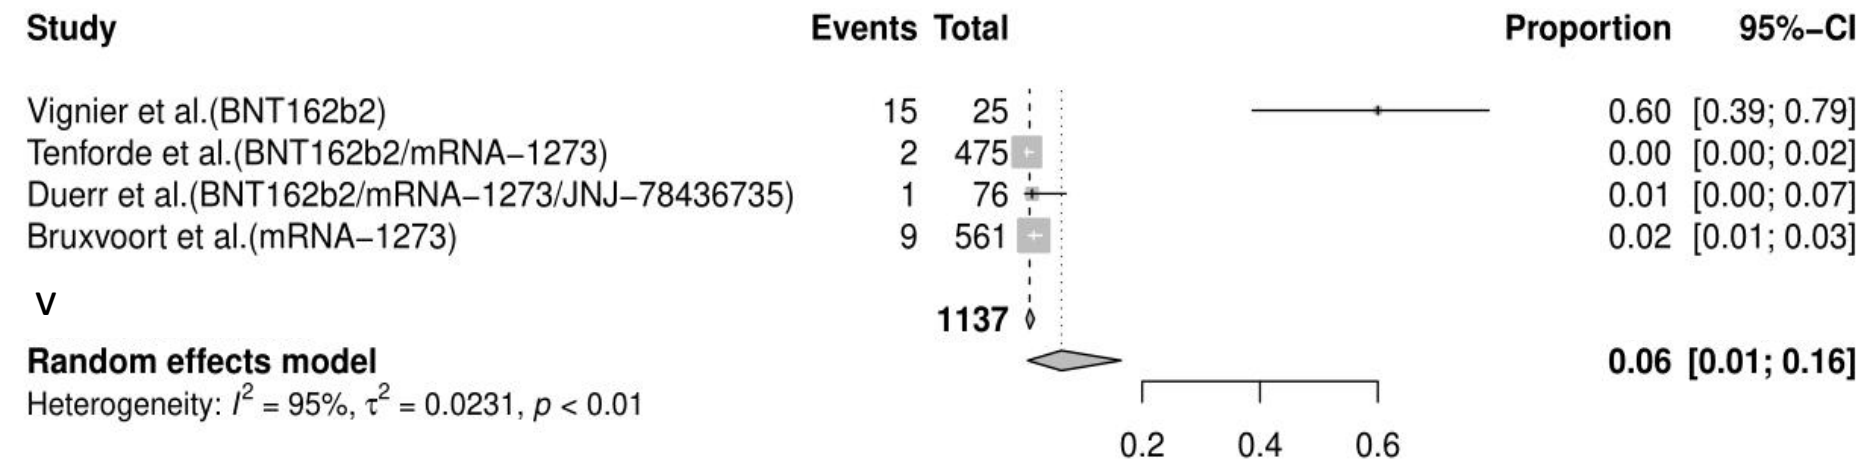

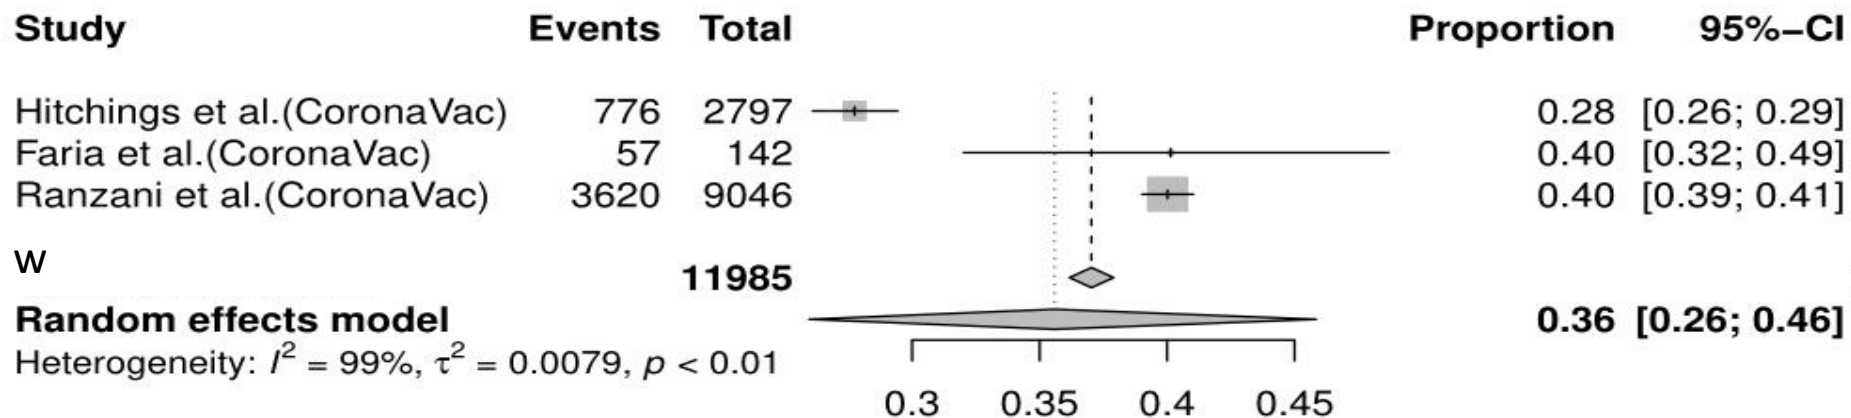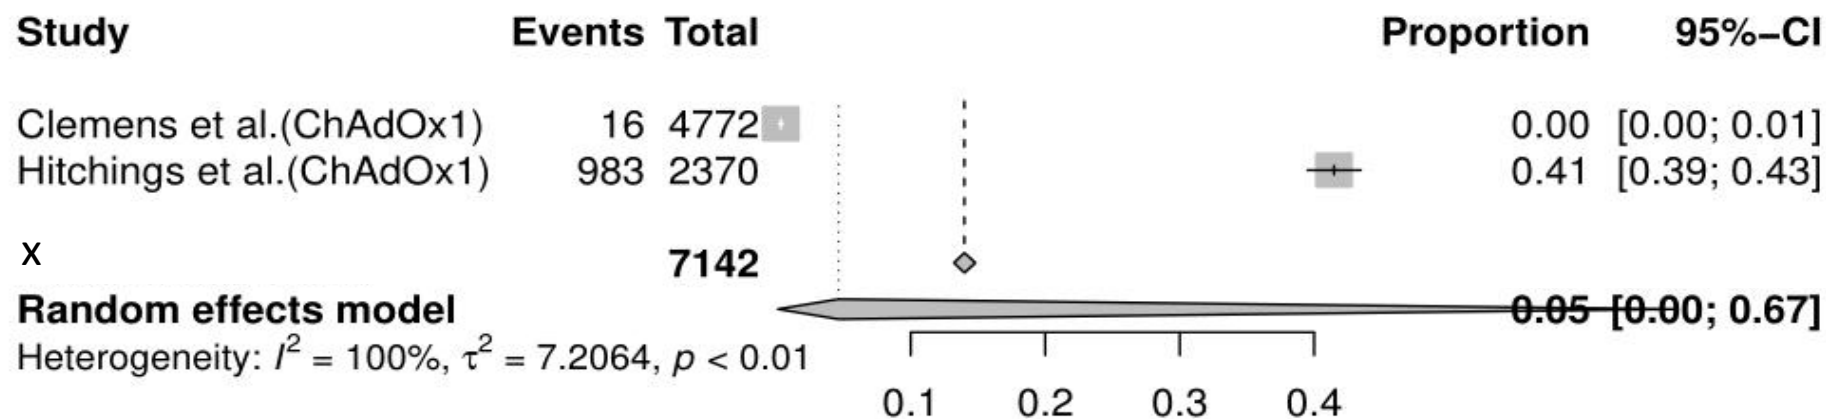

| Study                              | Events | Total  | Proportion | 95%-CI       |
|------------------------------------|--------|--------|------------|--------------|
| Bernal et al.(BNT162b2)            | 28     | 6412   | 0.00       | [0.00; 0.01] |
| Bernal et al.(ChAdOx1)*            | 46     | 2071   | 0.02       | [0.02; 0.03] |
| Grant et al.(BNT162b2)             | 2202   | 3927   | 0.56       | [0.55; 0.58] |
| Grant et al.(ChAdOx1)*             | 153    | 247    | 0.62       | [0.56; 0.68] |
| Tang et al. (BNT162b2)             | 998    | 6590   | 0.15       | [0.14; 0.16] |
| Tang et al. (mRNA-1273)*           | 150    | 1718   | 0.09       | [0.07; 0.10] |
| Tang et al. (BNT162b2/mRNA-1273)** | 1174   | 8036   | 0.15       | [0.14; 0.15] |
| Pouwels et al.(BNT162b2)           | 488    | 227907 | 0.00       | [0.00; 0.00] |
| Pouwels et al.(ChAdOx1)*           | 1328   | 379985 | 0.00       | [0.00; 0.00] |
| Yi et al.(BNT162b2)                | 24     | 56     | 0.43       | [0.30; 0.57] |
| Chemaitelly et al.(BNT162b2)       | 650    | 1768   | 0.37       | [0.35; 0.39] |
| Li et al.(CoronaVac)               | 12     | 109    | 0.11       | [0.06; 0.18] |
| Williams et al(ChAdOx1)            | 18     | 30     | 0.60       | [0.41; 0.77] |
| Desai et al.(BBV152)               | 186    | 449    | 0.41       | [0.37; 0.46] |
| Bruxvoort et al.(mRNA-1273)        | 232    | 4820   | 0.05       | [0.04; 0.05] |
| Reis et al.(BNT162b2)              | 75     | 46815  | 0.00       | [0.00; 0.00] |
| Olson et al.(BNT162b2)             | 6      | 179    | 0.03       | [0.01; 0.07] |

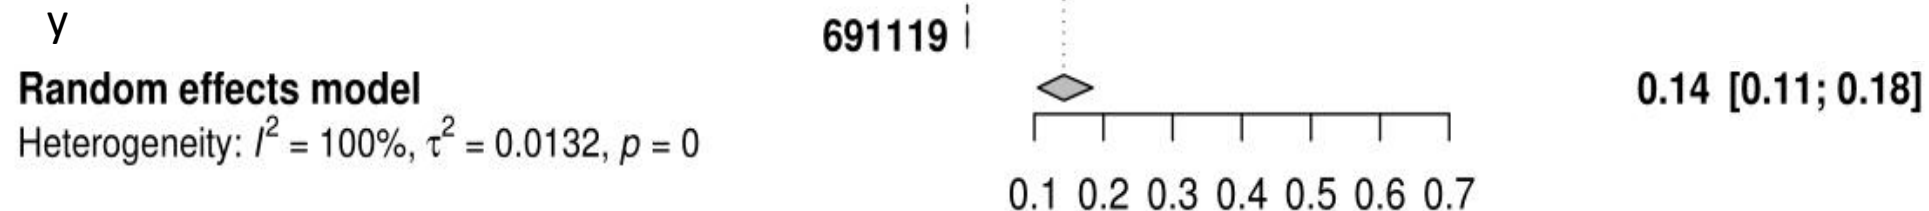

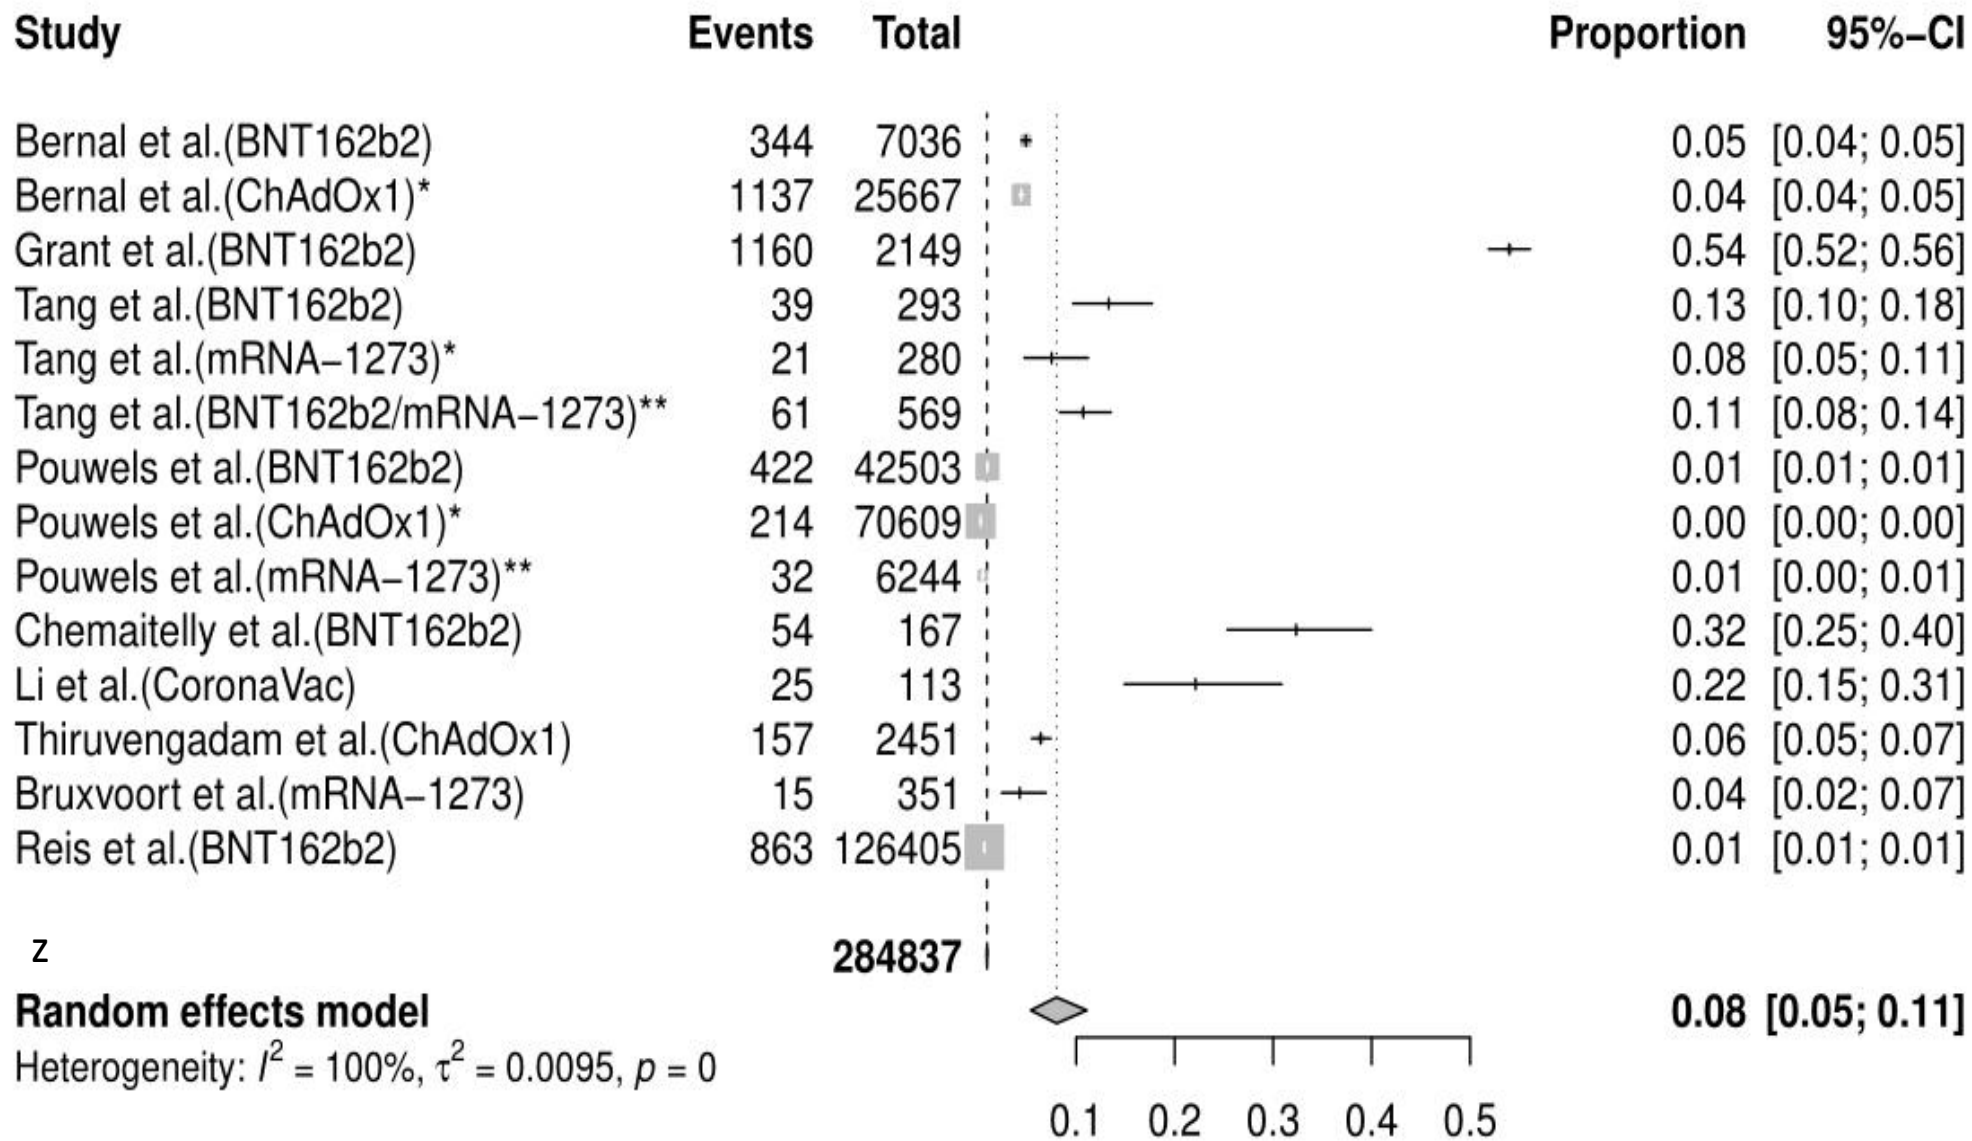

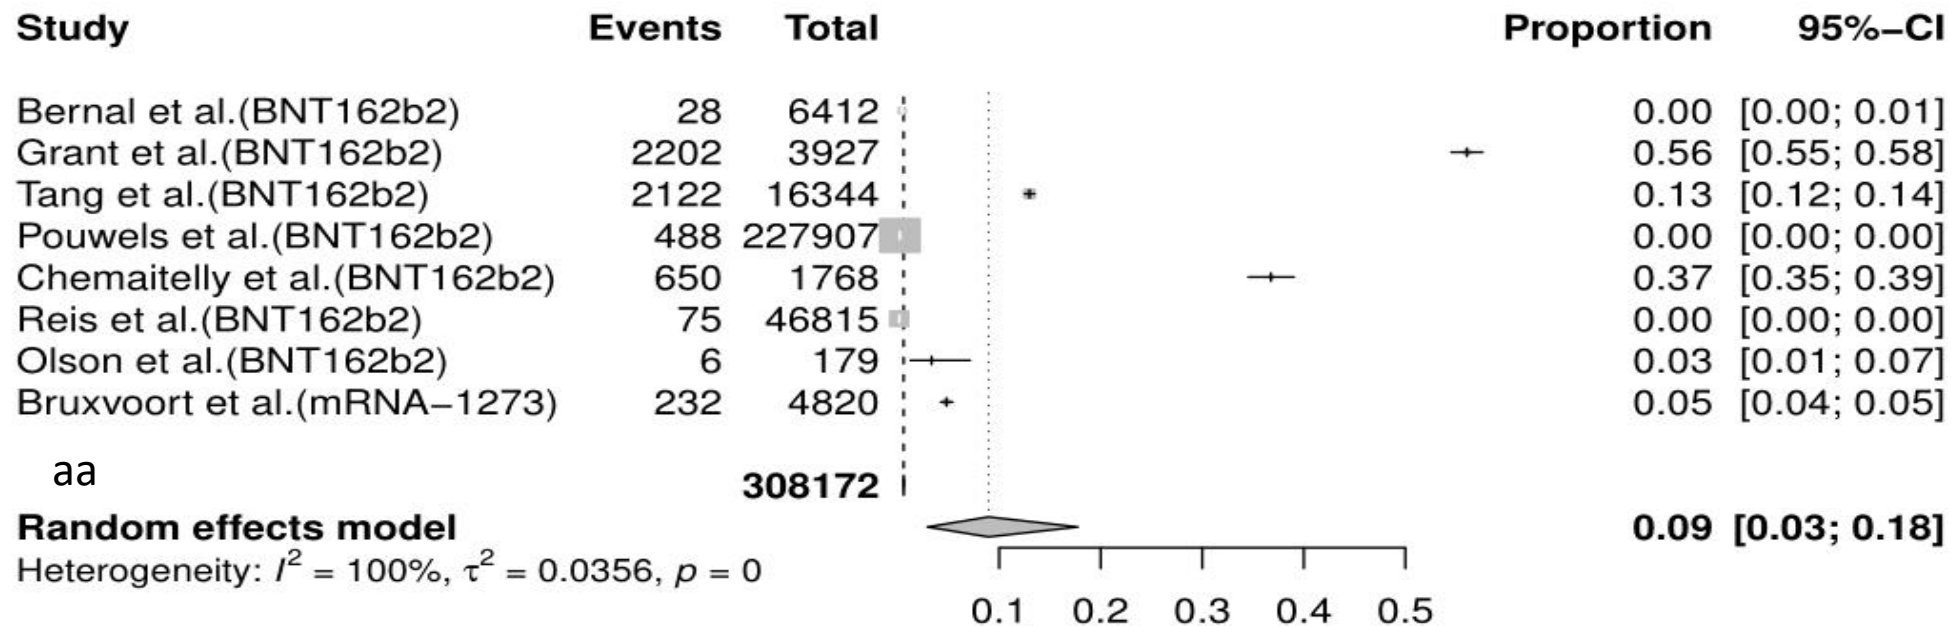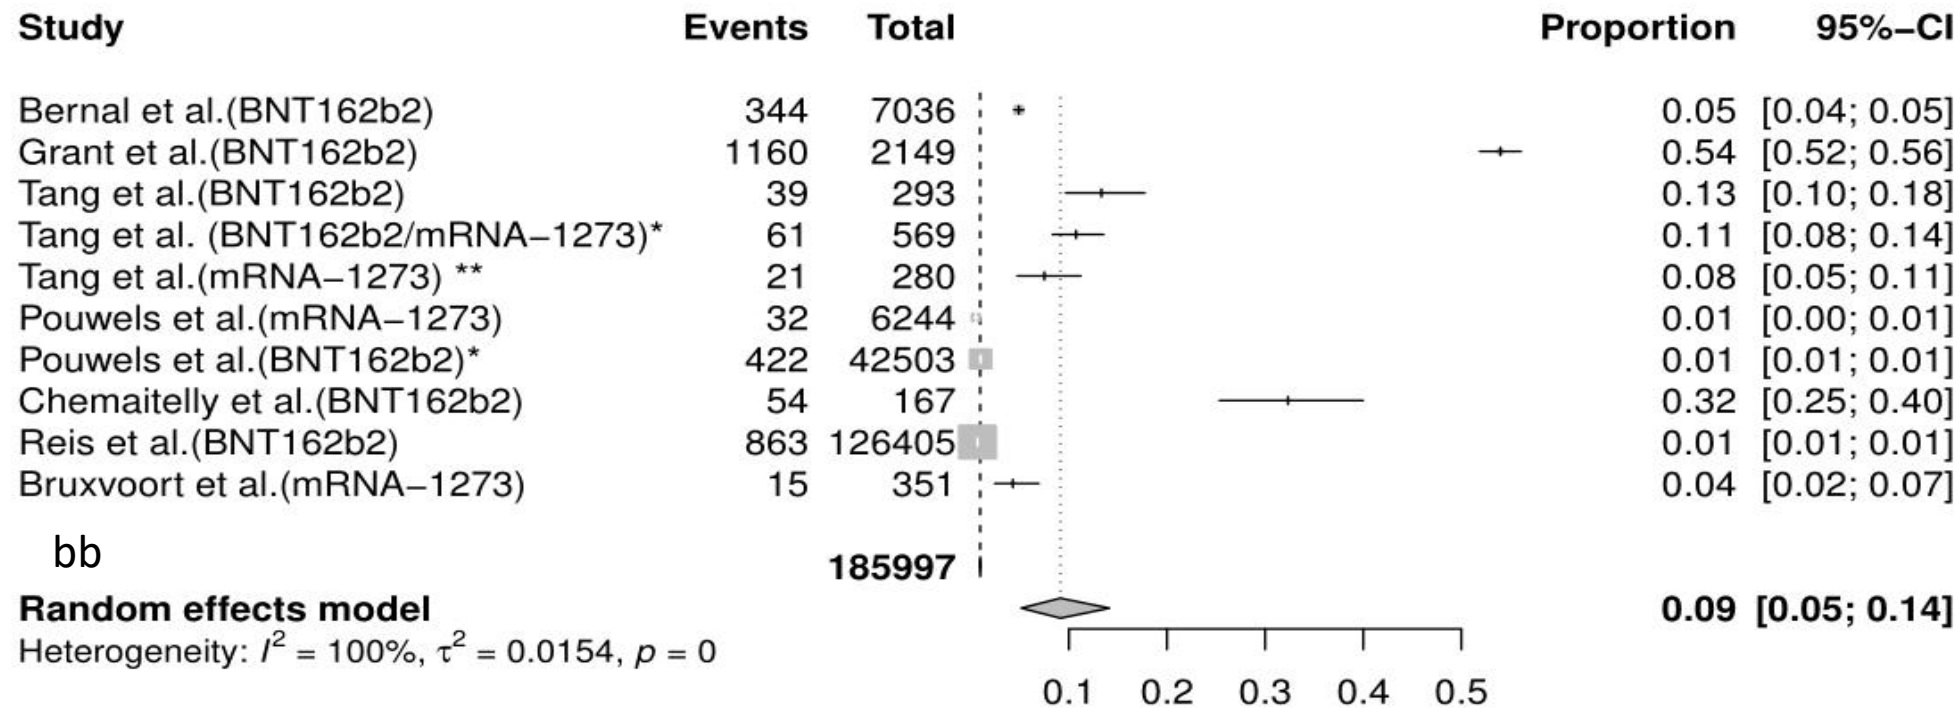

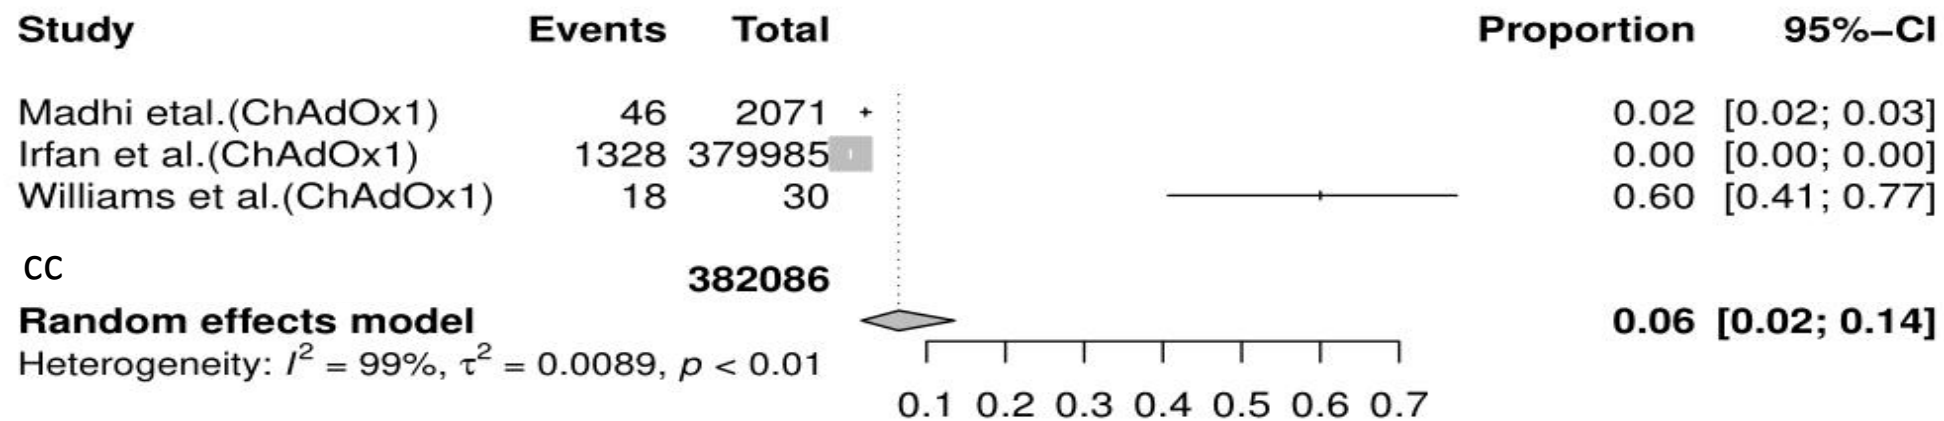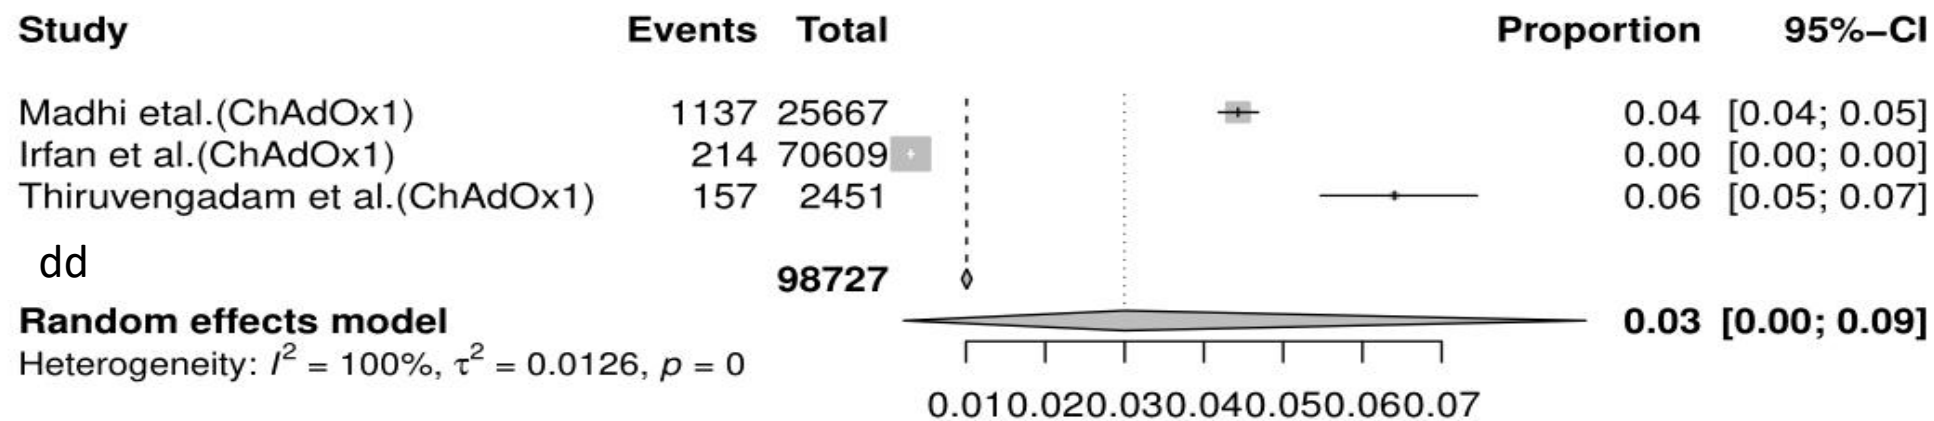



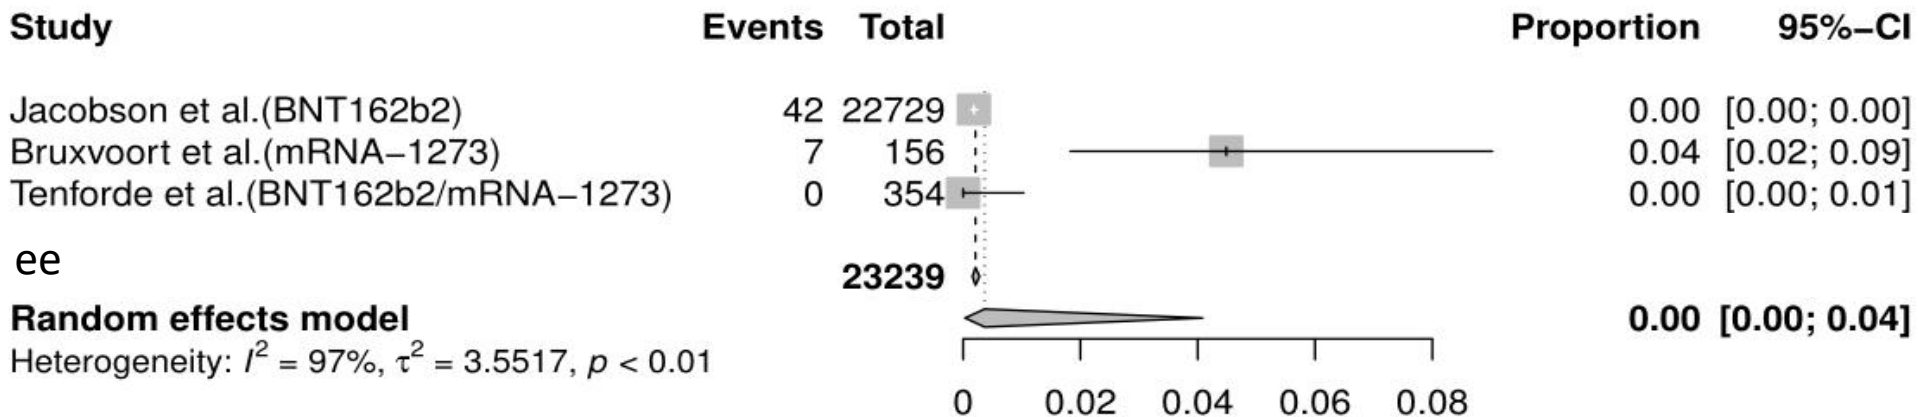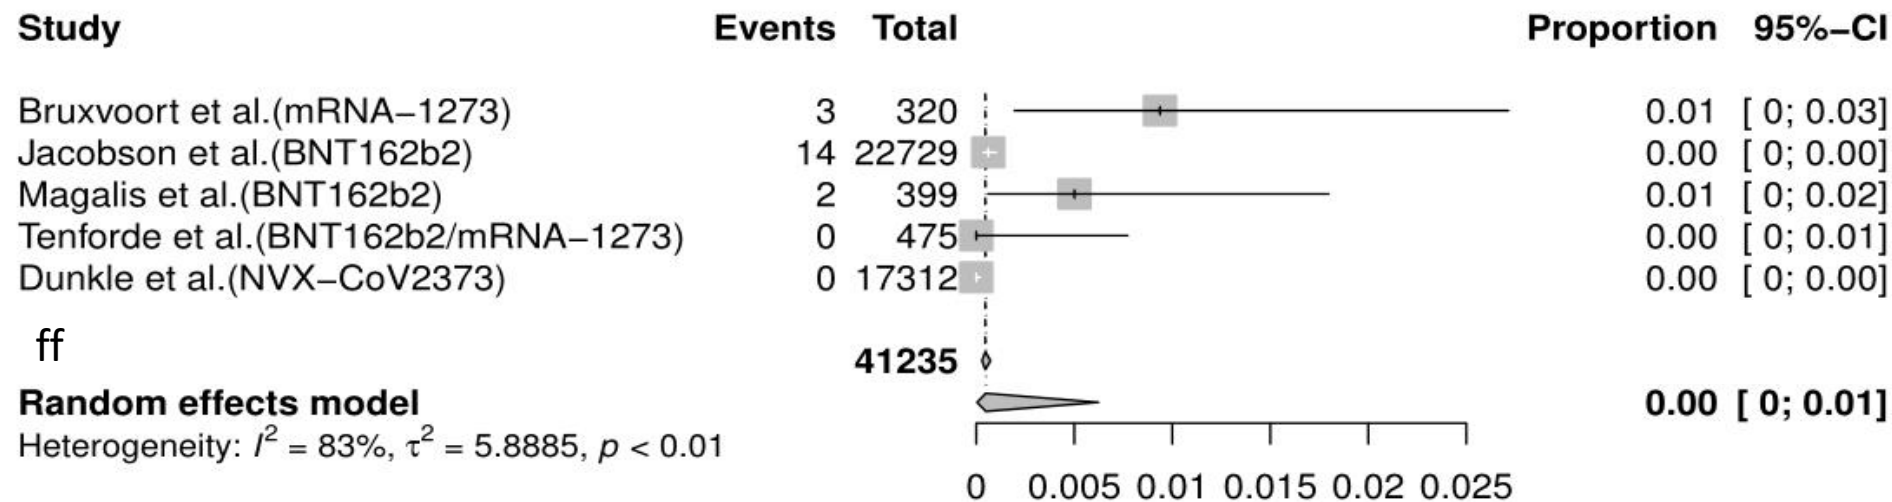

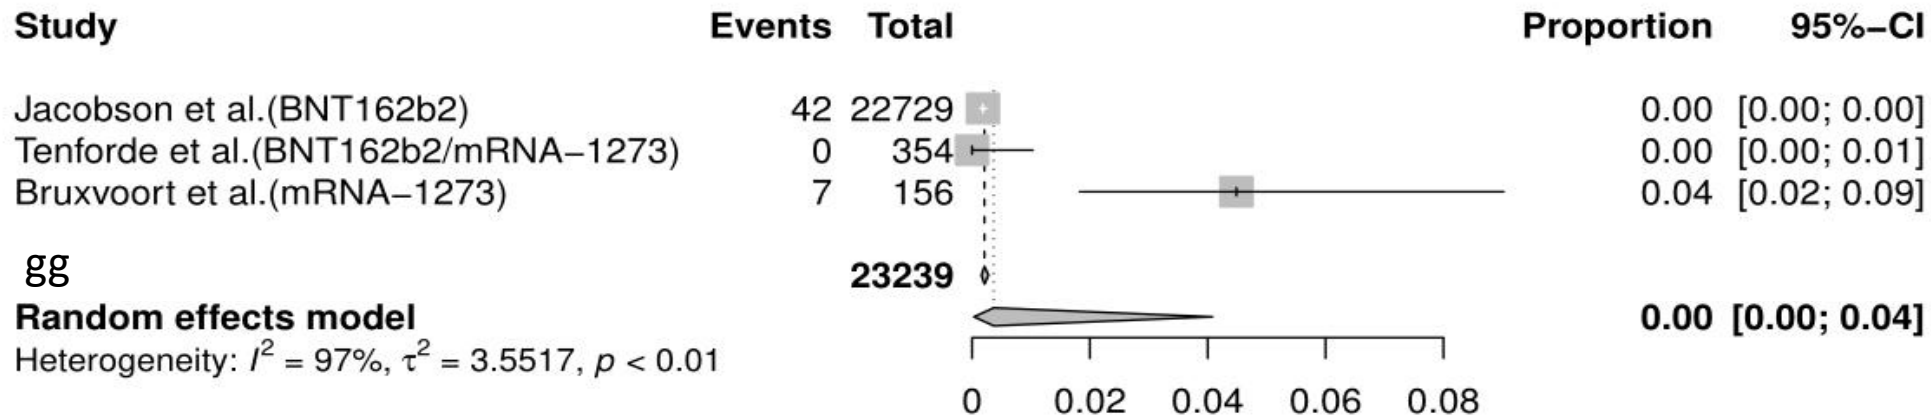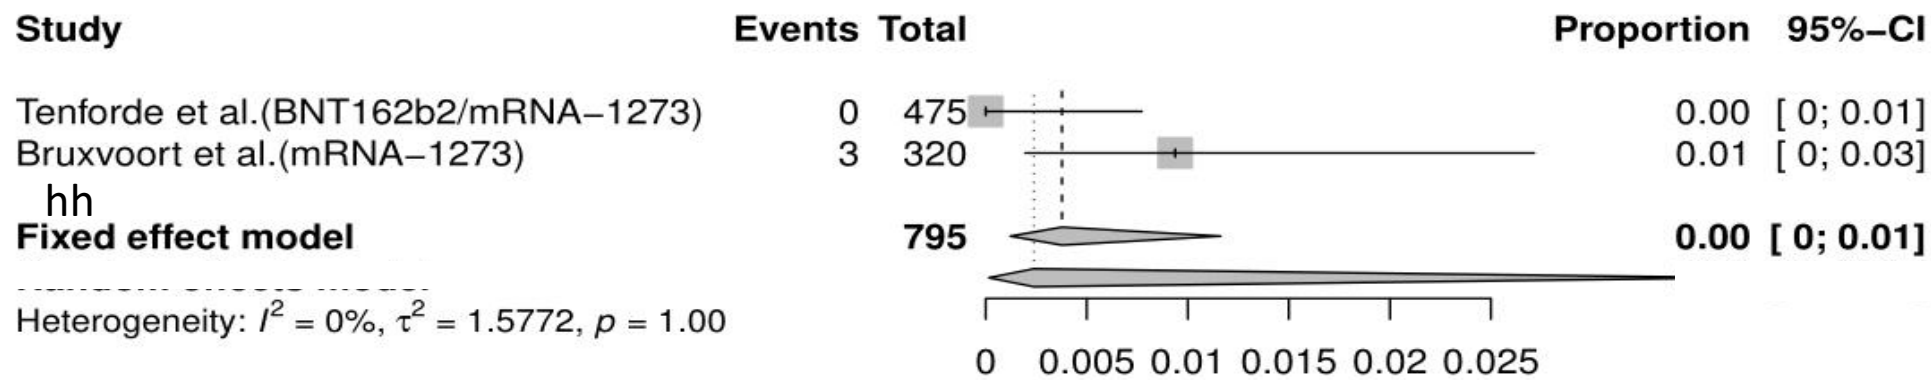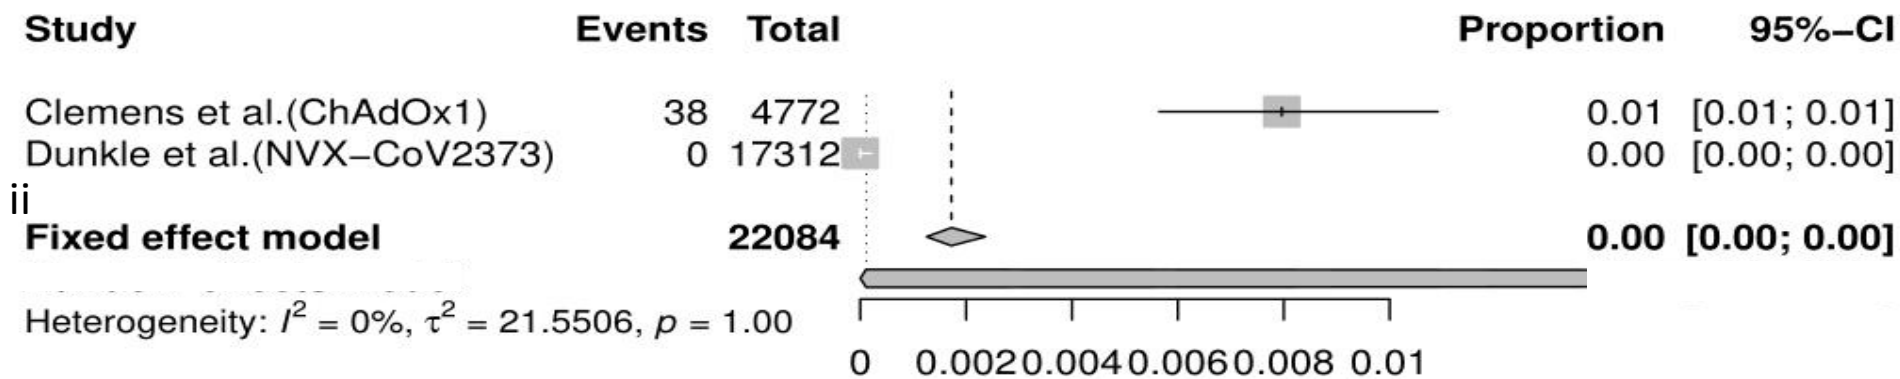

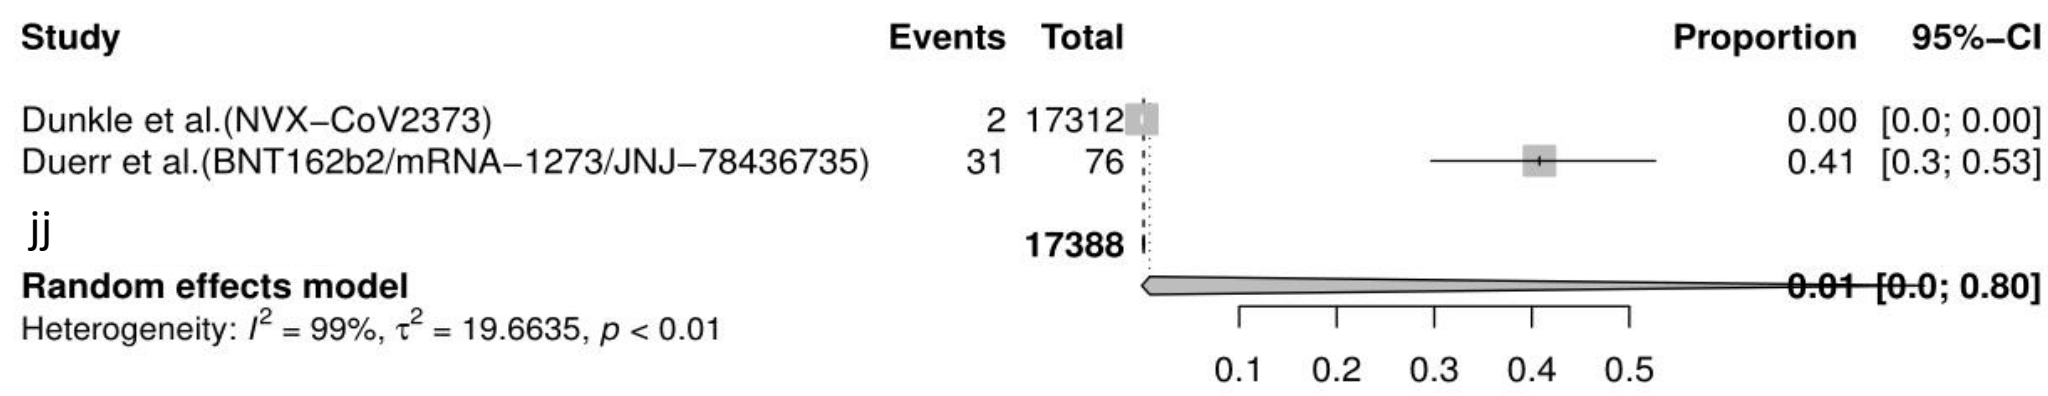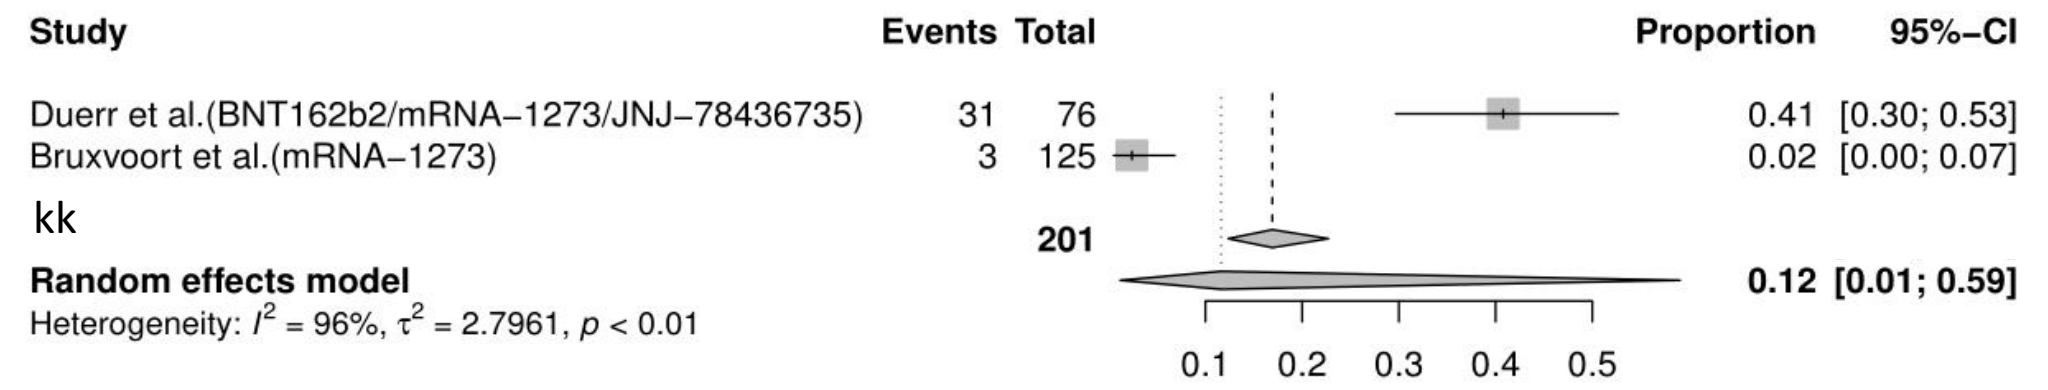

Supplement: Data_Sheet_1.pdf [file Data_Sheet_1.pdf]
