# Supplementary material for: Real-Word Effectiveness of Global COVID-19 Vaccines Against SARS-CoV-2 Variants: A Systematic Review and Meta-Analysis
Source: PubMed Central journal article supplement (PMC9160927; doi:10.3389/fmed.2022.820544), 2022-05-19

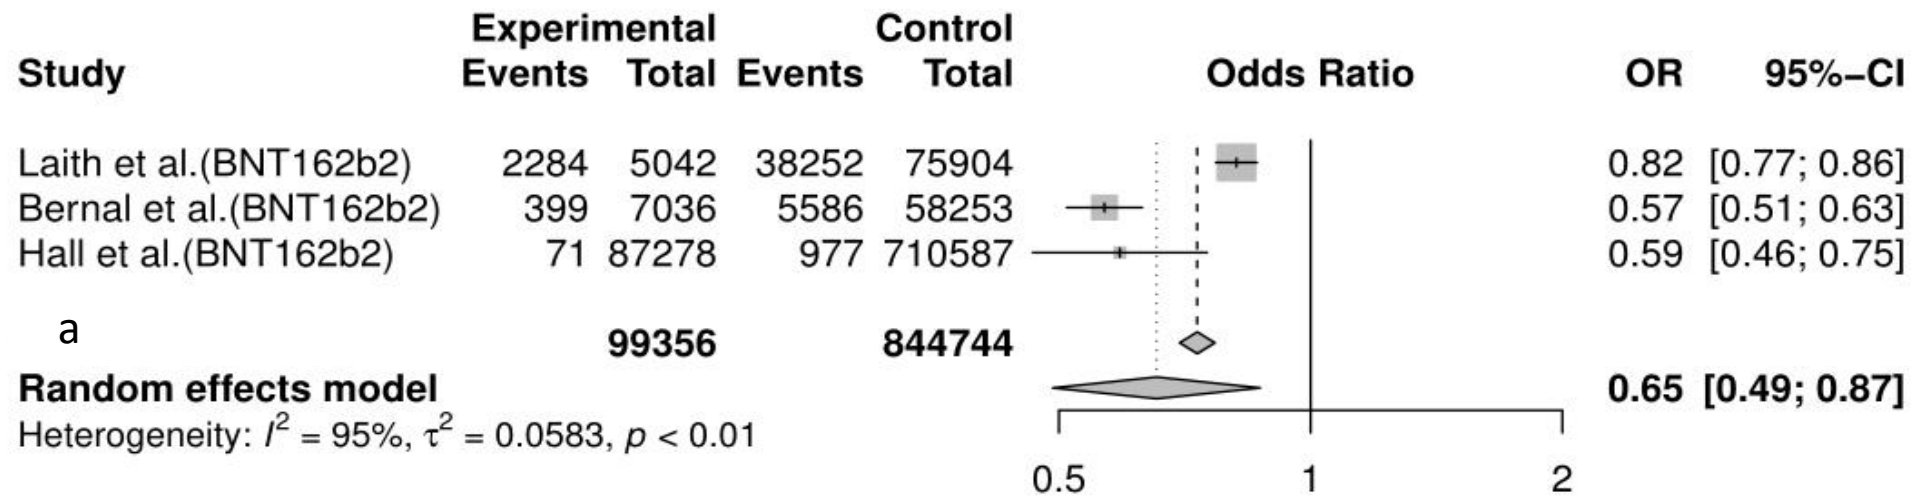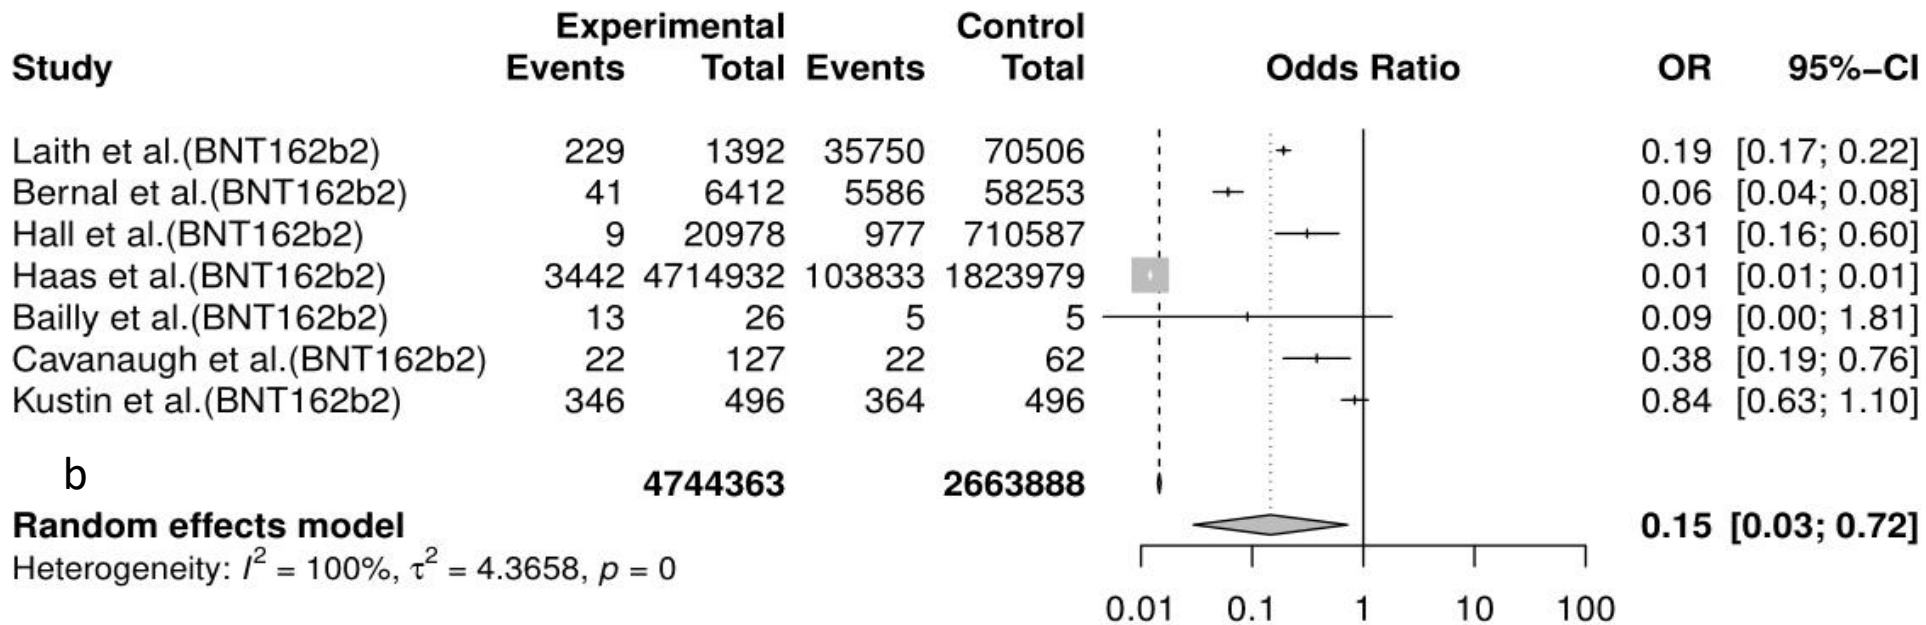

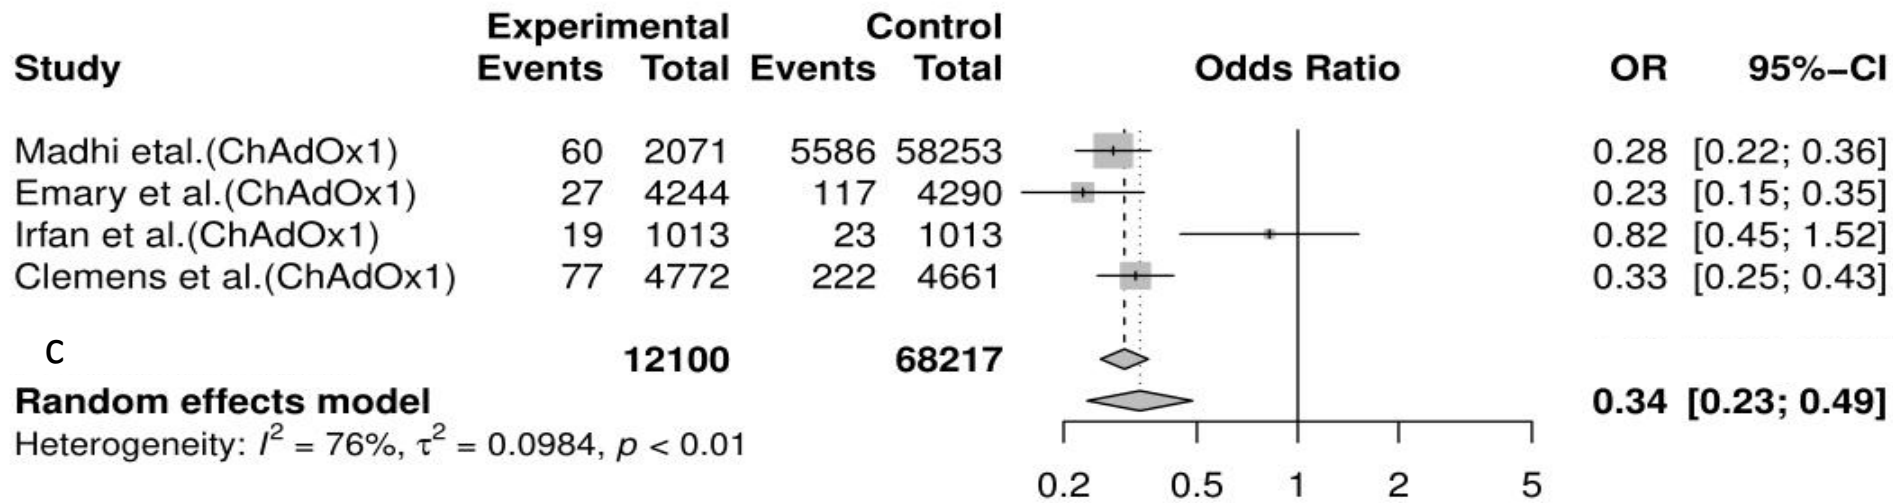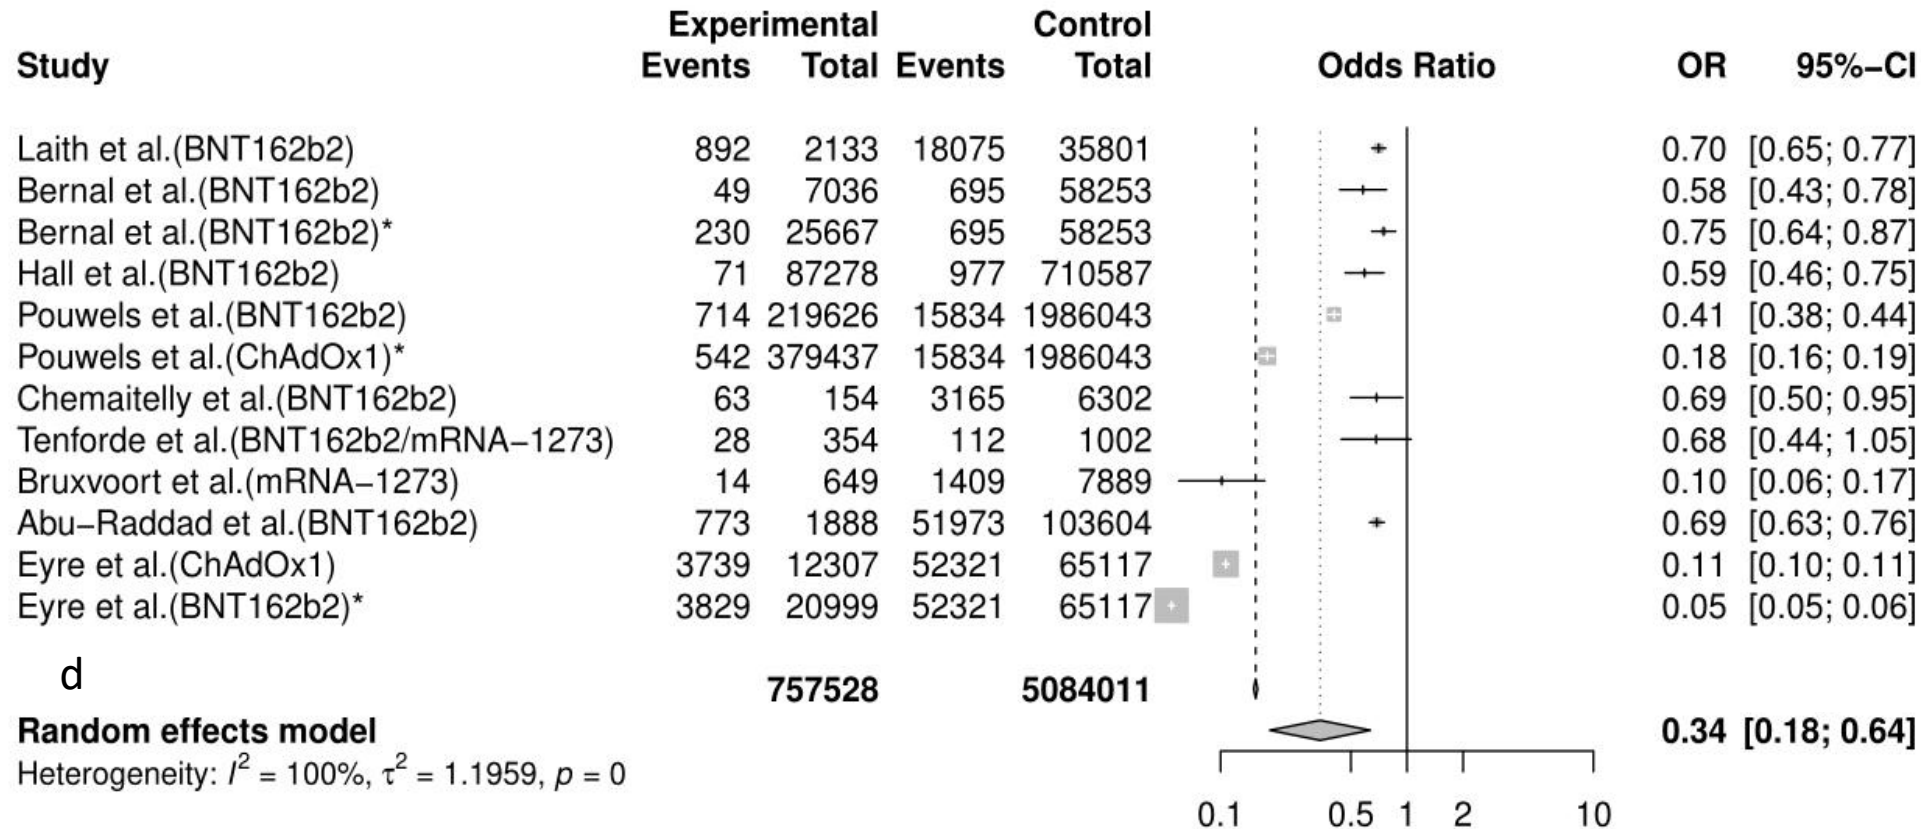

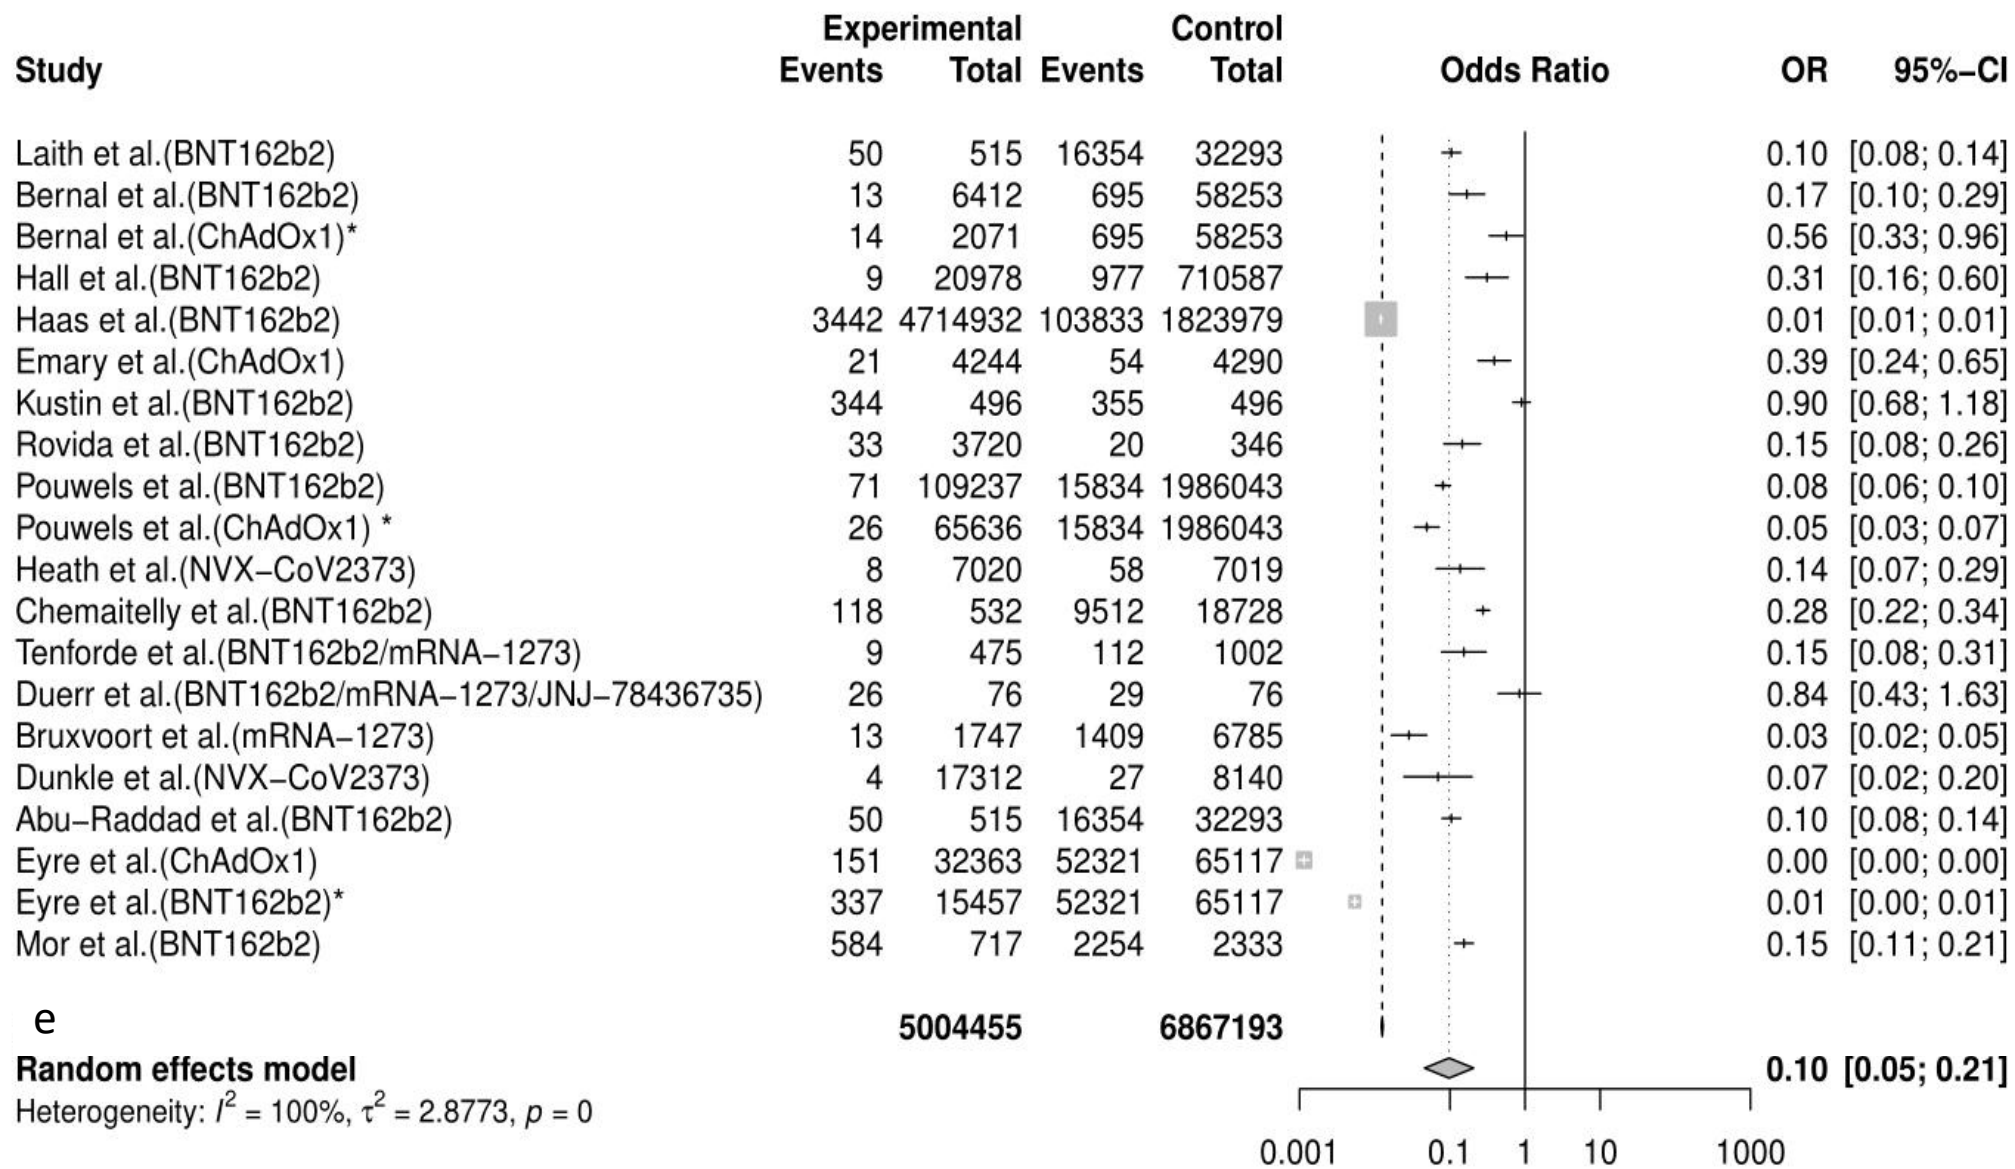

| Study                        | Experimental  |        | Control        |         | Odds Ratio | OR          | 95%-CI              |
|------------------------------|---------------|--------|----------------|---------|------------|-------------|---------------------|
|                              | Events        | Total  | Events         | Total   |            |             |                     |
| Laith et al.(BNT162b2)       | 892           | 2133   | 18075          | 35801   |            | 0.70        | [0.65; 0.77]        |
| Bernal et al.(BNT162b2)      | 49            | 7036   | 695            | 58253   |            | 0.58        | [0.43; 0.78]        |
| Hall et al.(BNT162b2)        | 71            | 87278  | 977            | 710587  |            | 0.59        | [0.46; 0.75]        |
| Pouwels et al.(BNT162b2)     | 714           | 219626 | 15834          | 1986043 |            | 0.41        | [0.38; 0.44]        |
| Chemaitelly et al.(BNT162b2) | 63            | 154    | 3165           | 6302    |            | 0.69        | [0.50; 0.95]        |
| Abu-Raddad et al.(BNT162b2)  | 773           | 1888   | 51973          | 103604  |            | 0.69        | [0.63; 0.76]        |
| Eyre et al.(BNT162b2)        | 3829          | 20999  | 52321          | 65117   |            | 0.05        | [0.05; 0.06]        |
| Bruxvoort et al.(mRNA-1273)  | 14            | 649    | 1409           | 7889    |            | 0.10        | [0.06; 0.17]        |
| <b>f</b>                     | <b>339763</b> |        | <b>2973596</b> |         |            | <b>0.36</b> | <b>[0.13; 1.00]</b> |

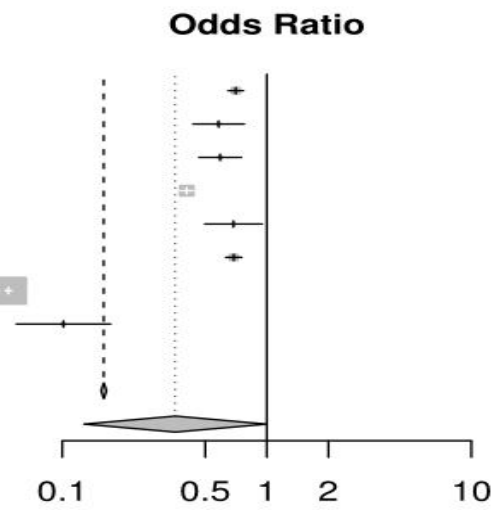

**Random effects model**  
Heterogeneity:  $I^2 = 100\%$ ,  $\tau^2 = 2.1904$ ,  $p = 0$

| Study                                         | Experimental |         | Control |         | Odds Ratio | OR   | 95%-CI       |
|-----------------------------------------------|--------------|---------|---------|---------|------------|------|--------------|
|                                               | Events       | Total   | Events  | Total   |            |      |              |
| Laith et al.(BNT162b2)                        | 50           | 515     | 16354   | 32293   |            | 0.10 | [0.08; 0.14] |
| Bernal et al.(BNT162b2)                       | 13           | 6412    | 695     | 58253   |            | 0.17 | [0.10; 0.29] |
| Hall et al.(BNT162b2)                         | 9            | 20978   | 977     | 710587  |            | 0.31 | [0.16; 0.60] |
| Haas et al.(BNT162b2)                         | 3442         | 4714932 | 103833  | 1823979 |            | 0.01 | [0.01; 0.01] |
| Kustin et al.(BNT162b2)                       | 344          | 496     | 355     | 496     |            | 0.90 | [0.68; 1.18] |
| Rovida et al.(BNT162b2)                       | 33           | 3720    | 20      | 346     |            | 0.15 | [0.08; 0.26] |
| Pouwels et al.(BNT162b2)                      | 71           | 109237  | 15834   | 1986043 |            | 0.08 | [0.06; 0.10] |
| Chemaitelly et al.(BNT162b2)                  | 118          | 532     | 9512    | 18728   |            | 0.28 | [0.22; 0.34] |
| Abu-Raddad et al.(BNT162b2)                   | 50           | 515     | 16354   | 32293   |            | 0.10 | [0.08; 0.14] |
| Eyre et al.(BNT162b2)                         | 337          | 15457   | 52321   | 65117   |            | 0.01 | [0.00; 0.01] |
| Mor et al.(BNT162b2)                          | 584          | 717     | 2254    | 2333    |            | 0.15 | [0.11; 0.21] |
| Duerr et al.(BNT162b2/mRNA-1273/JNJ-78436735) | 26           | 76      | 29      | 76      |            | 0.84 | [0.43; 1.63] |
| Bruxvoort et al.(mRNA-1273)                   | 13           | 1747    | 1409    | 6785    |            | 0.03 | [0.02; 0.05] |

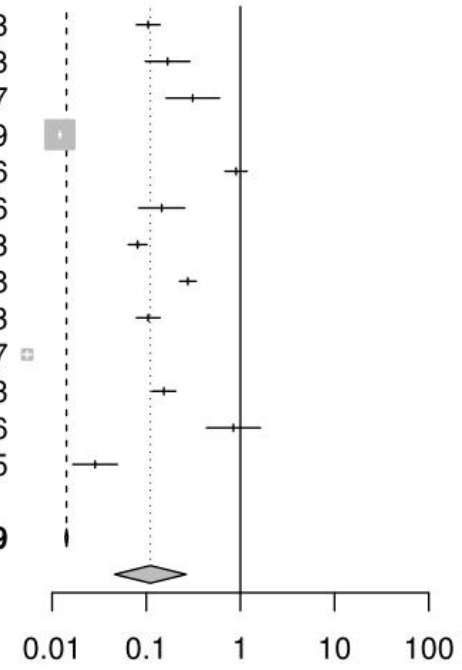

**g**  
**Random effects model**  
Heterogeneity:  $I^2 = 100\%$ ,  $\tau^2 = 2.5342$ ,  $p = 0$

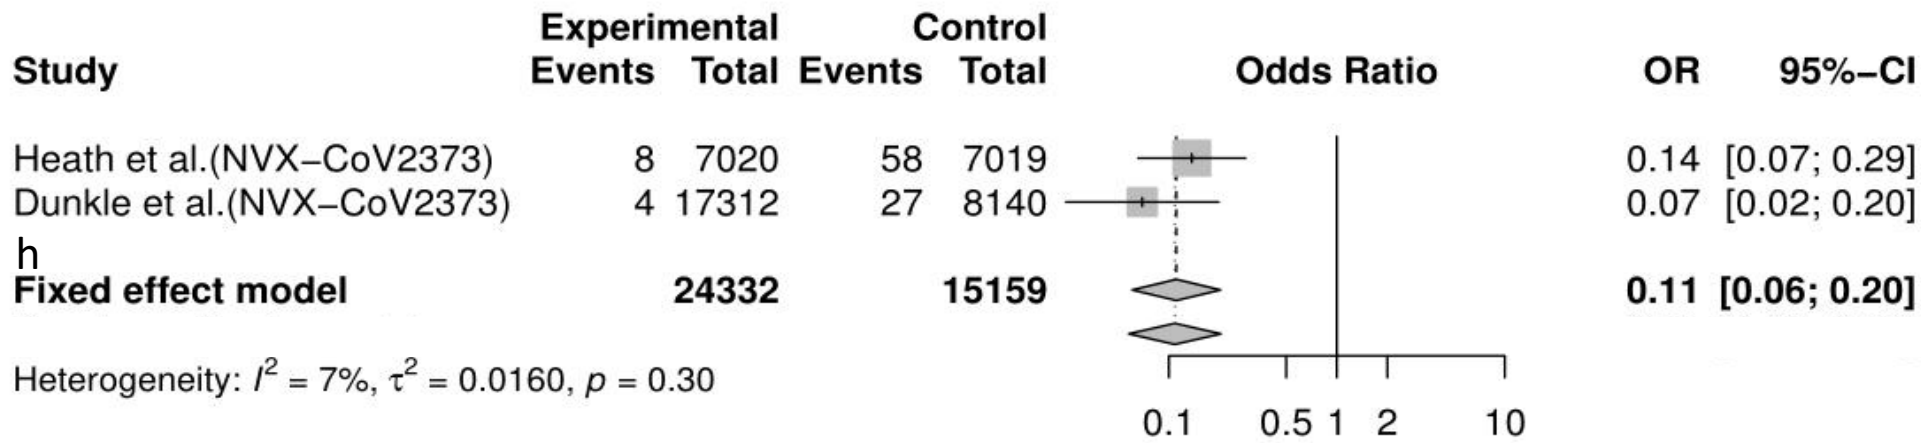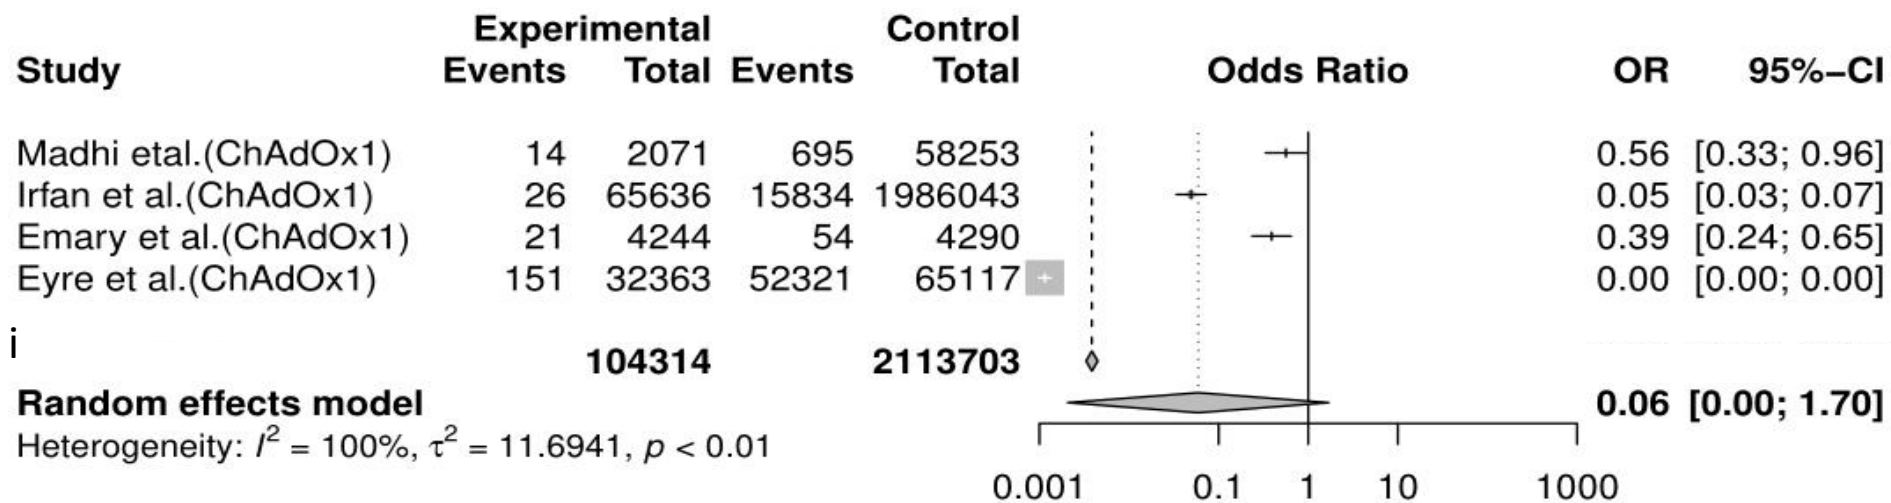

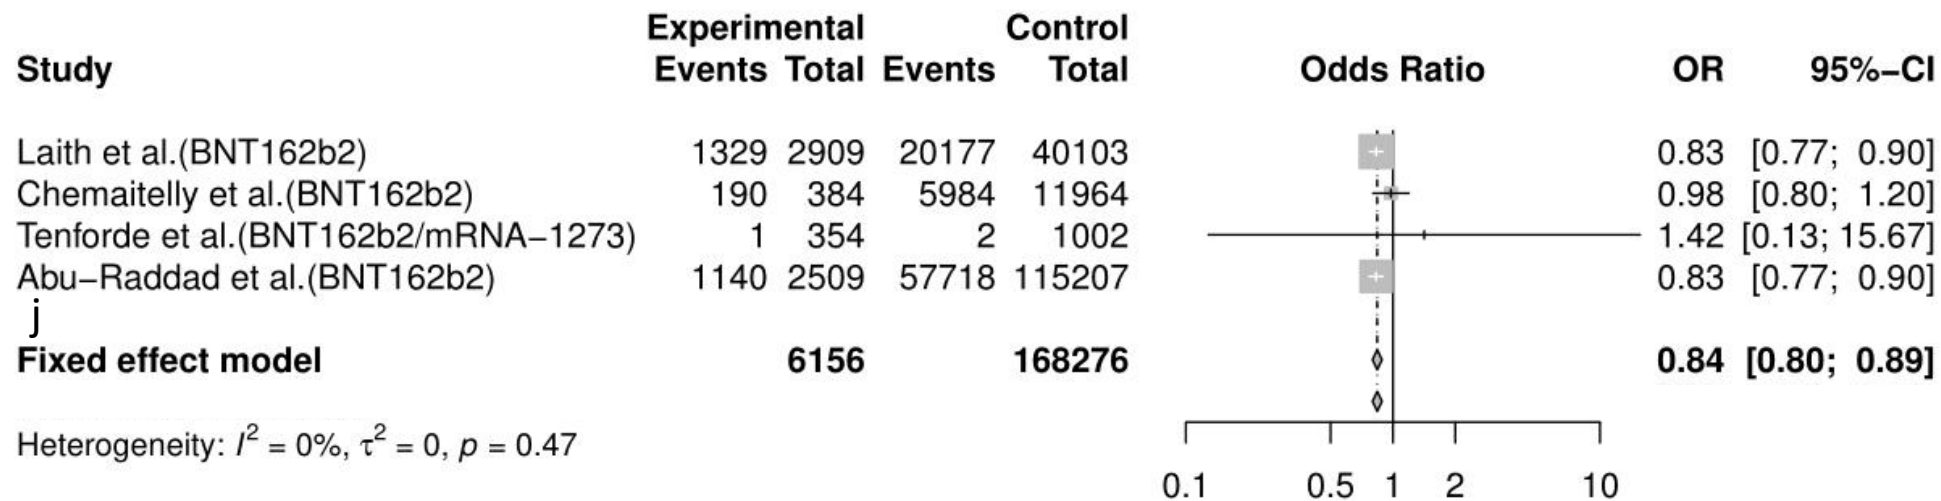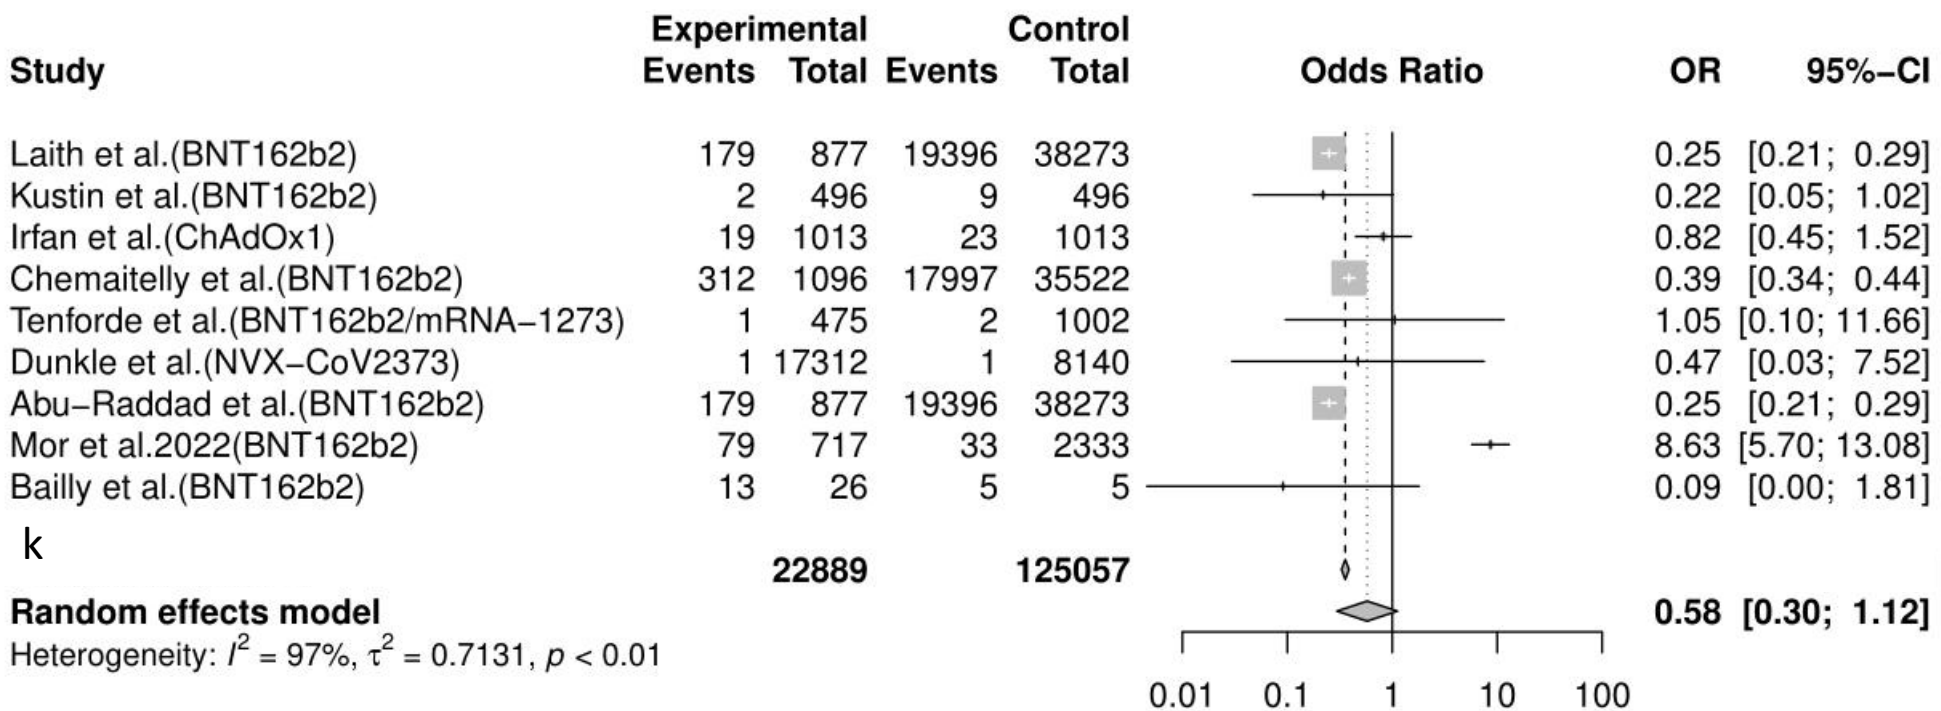

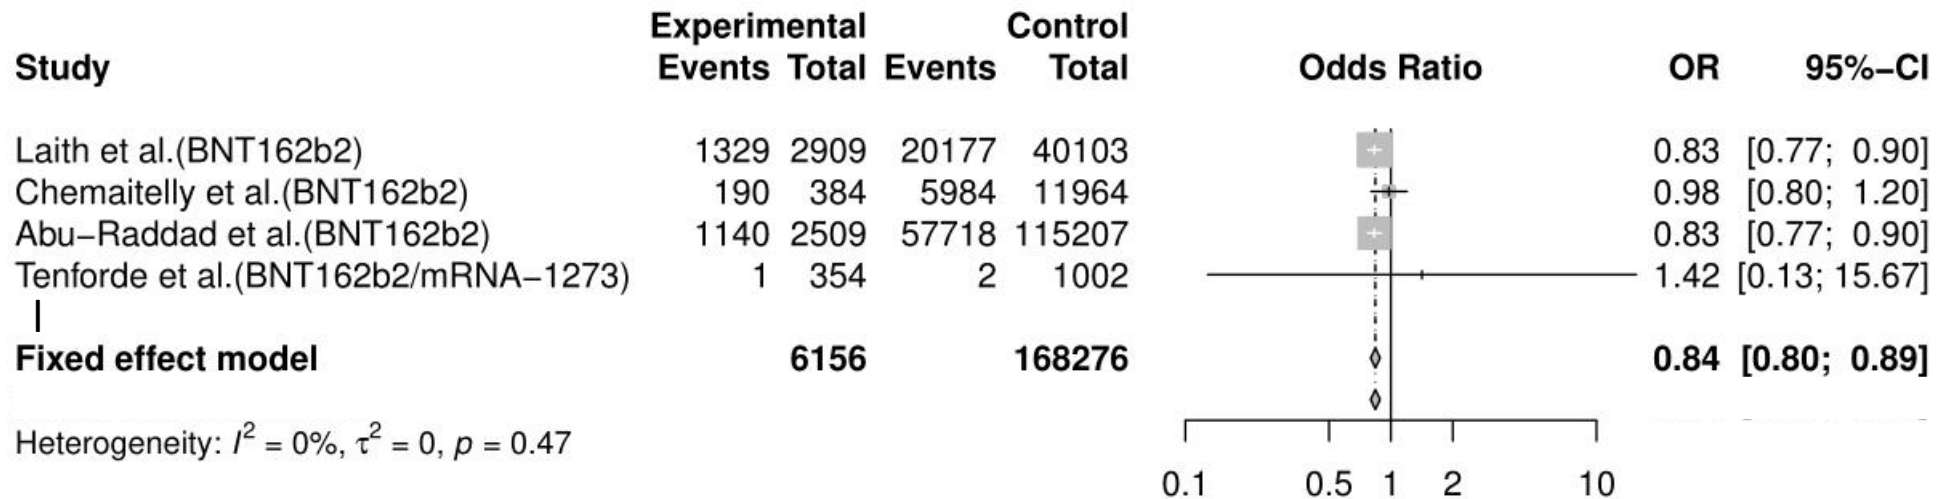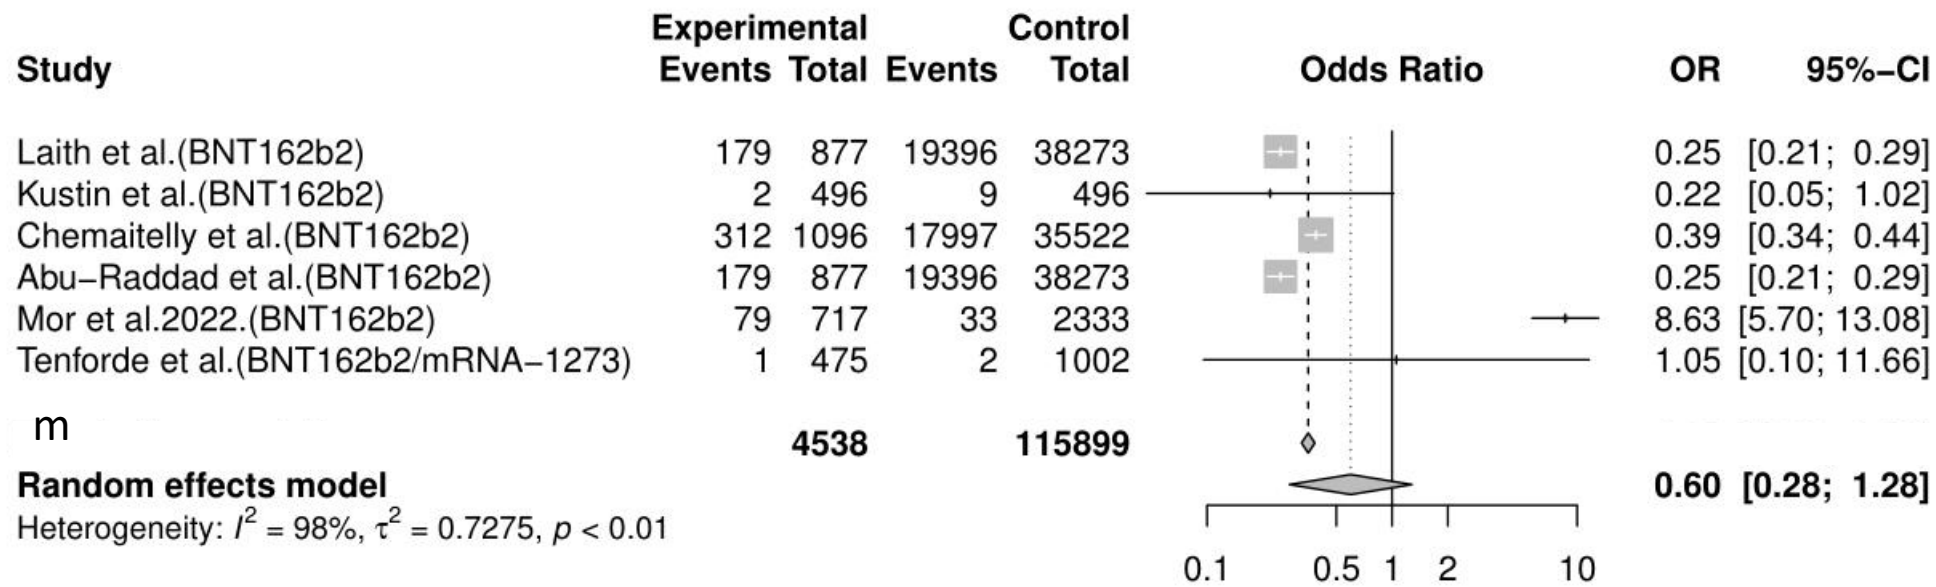

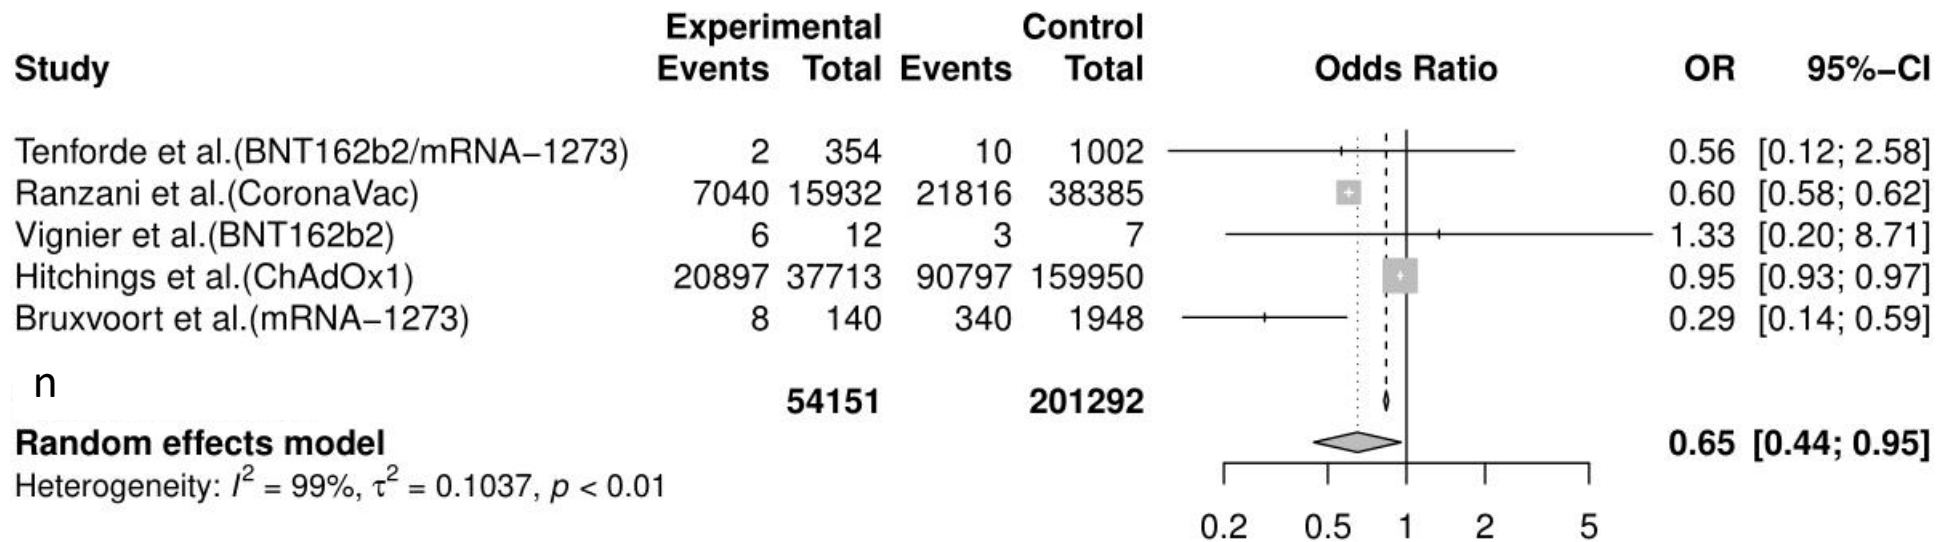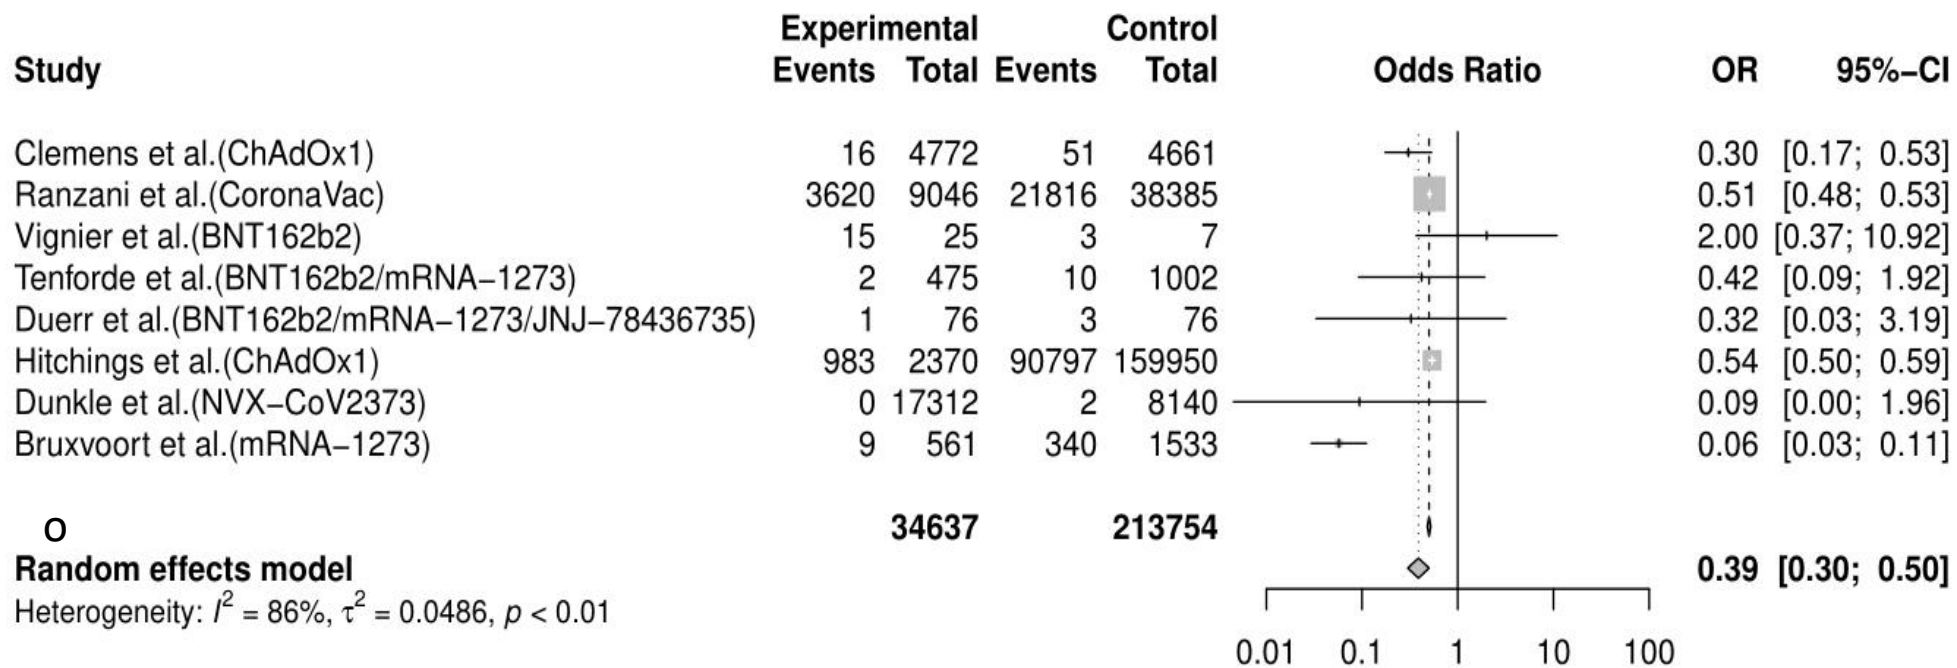



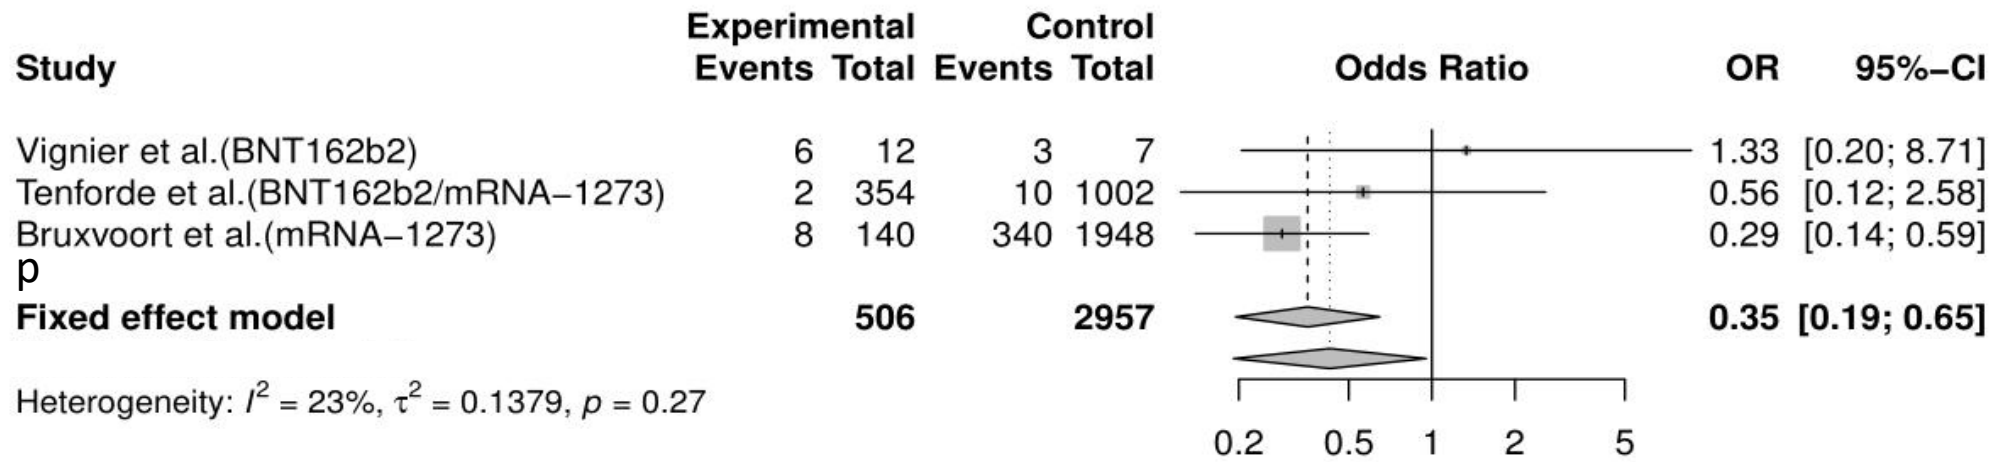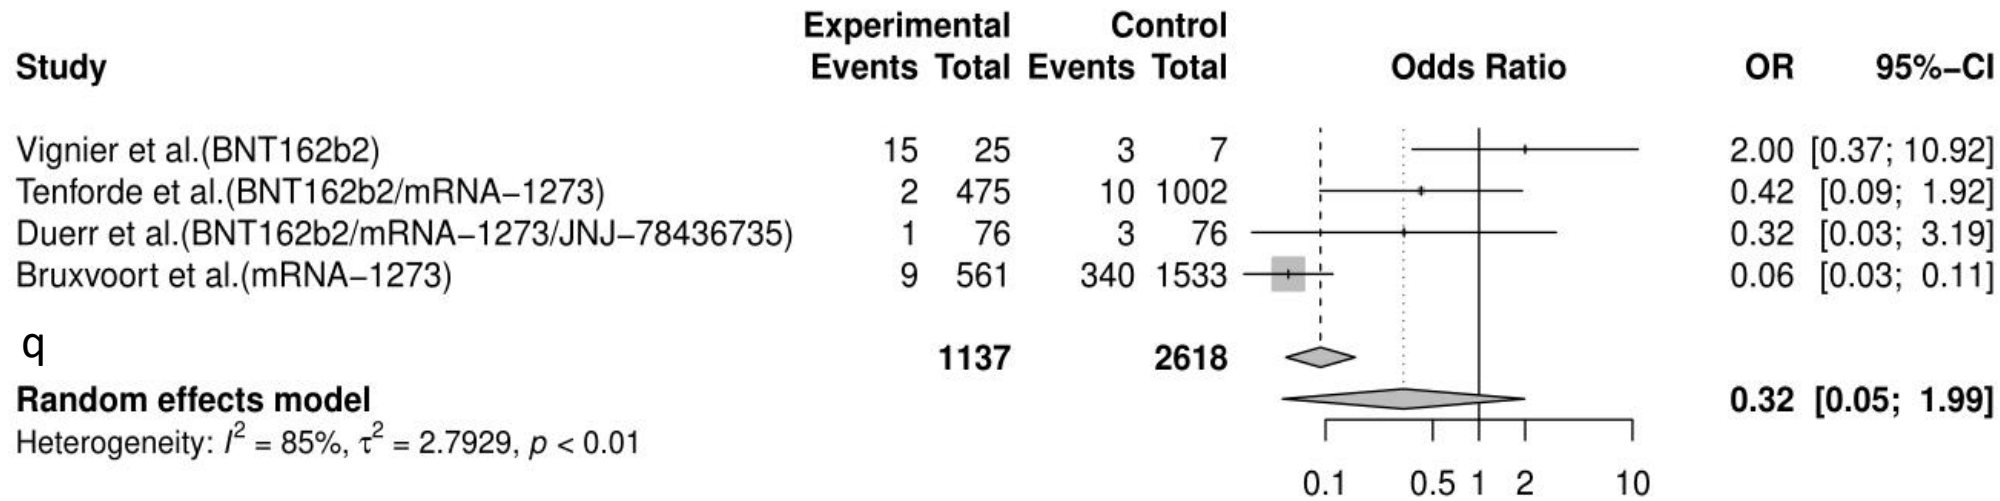

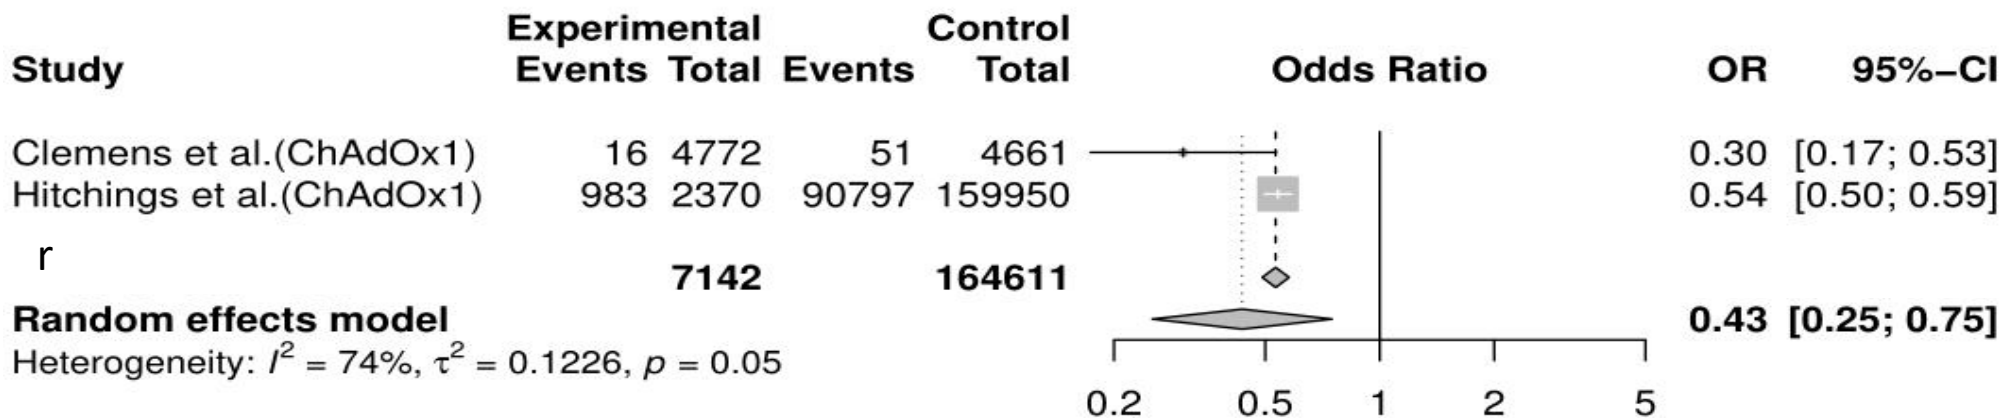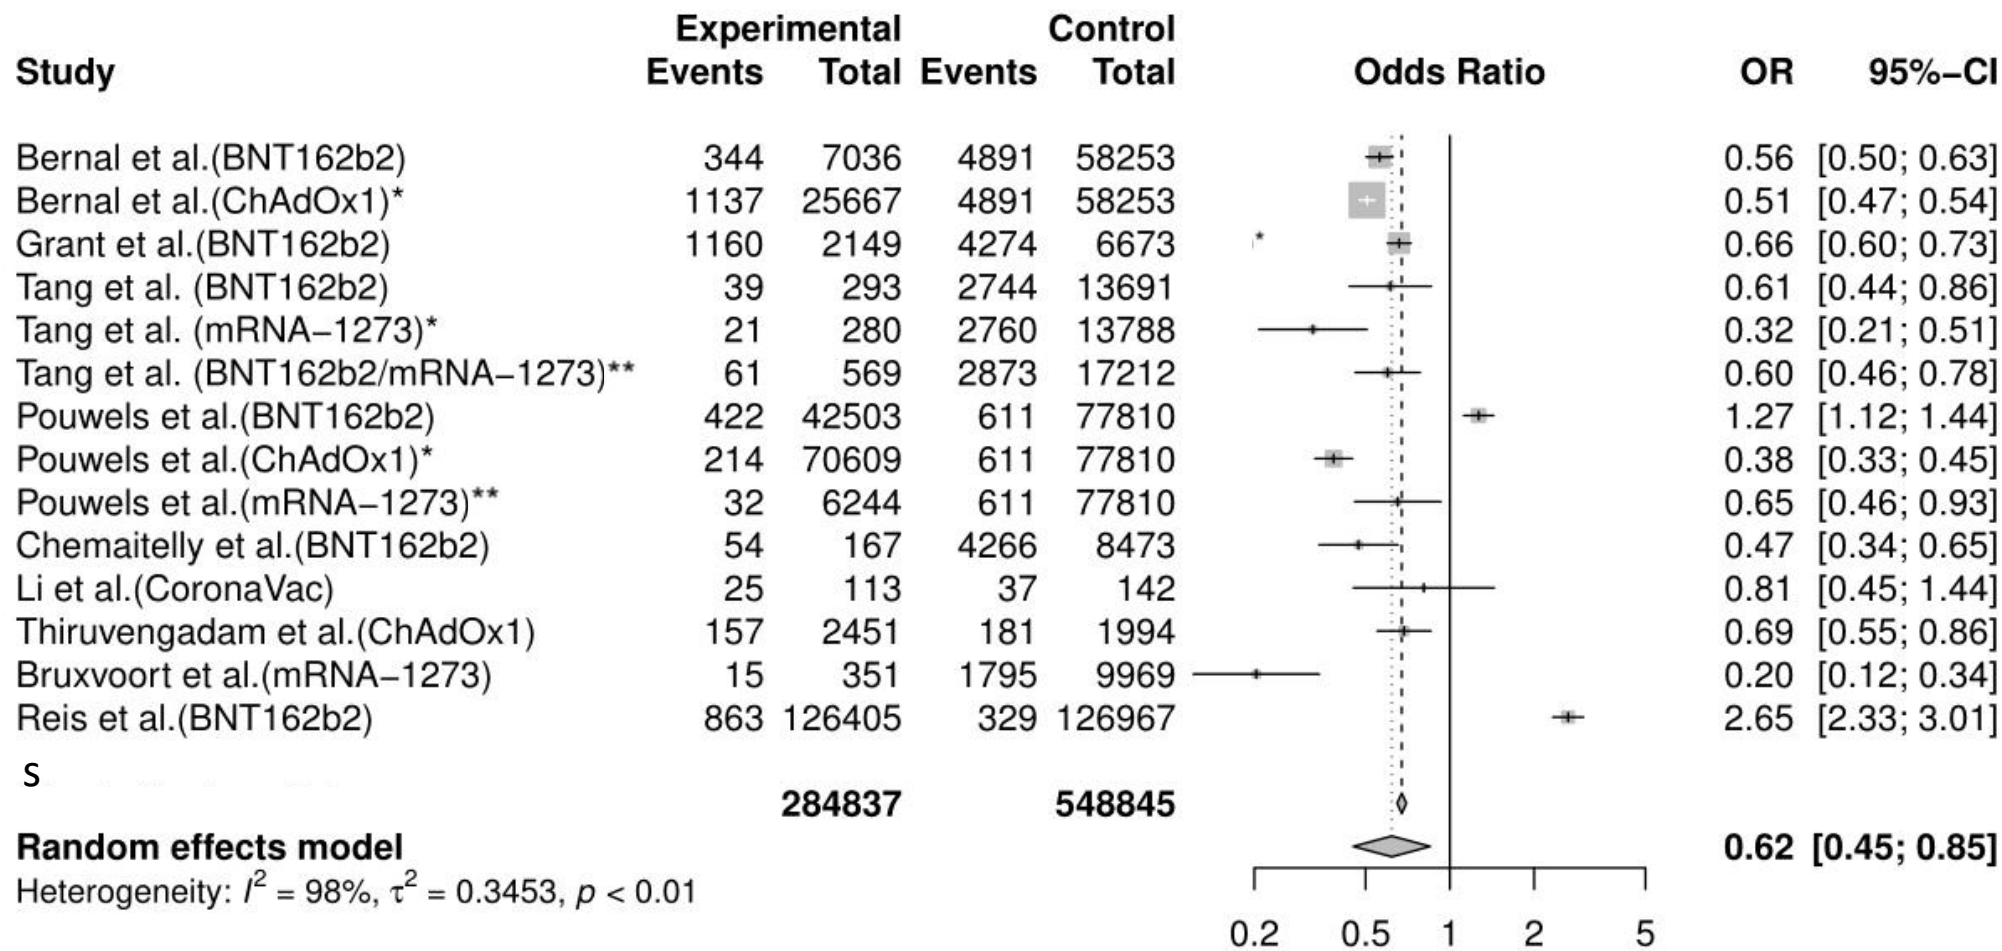

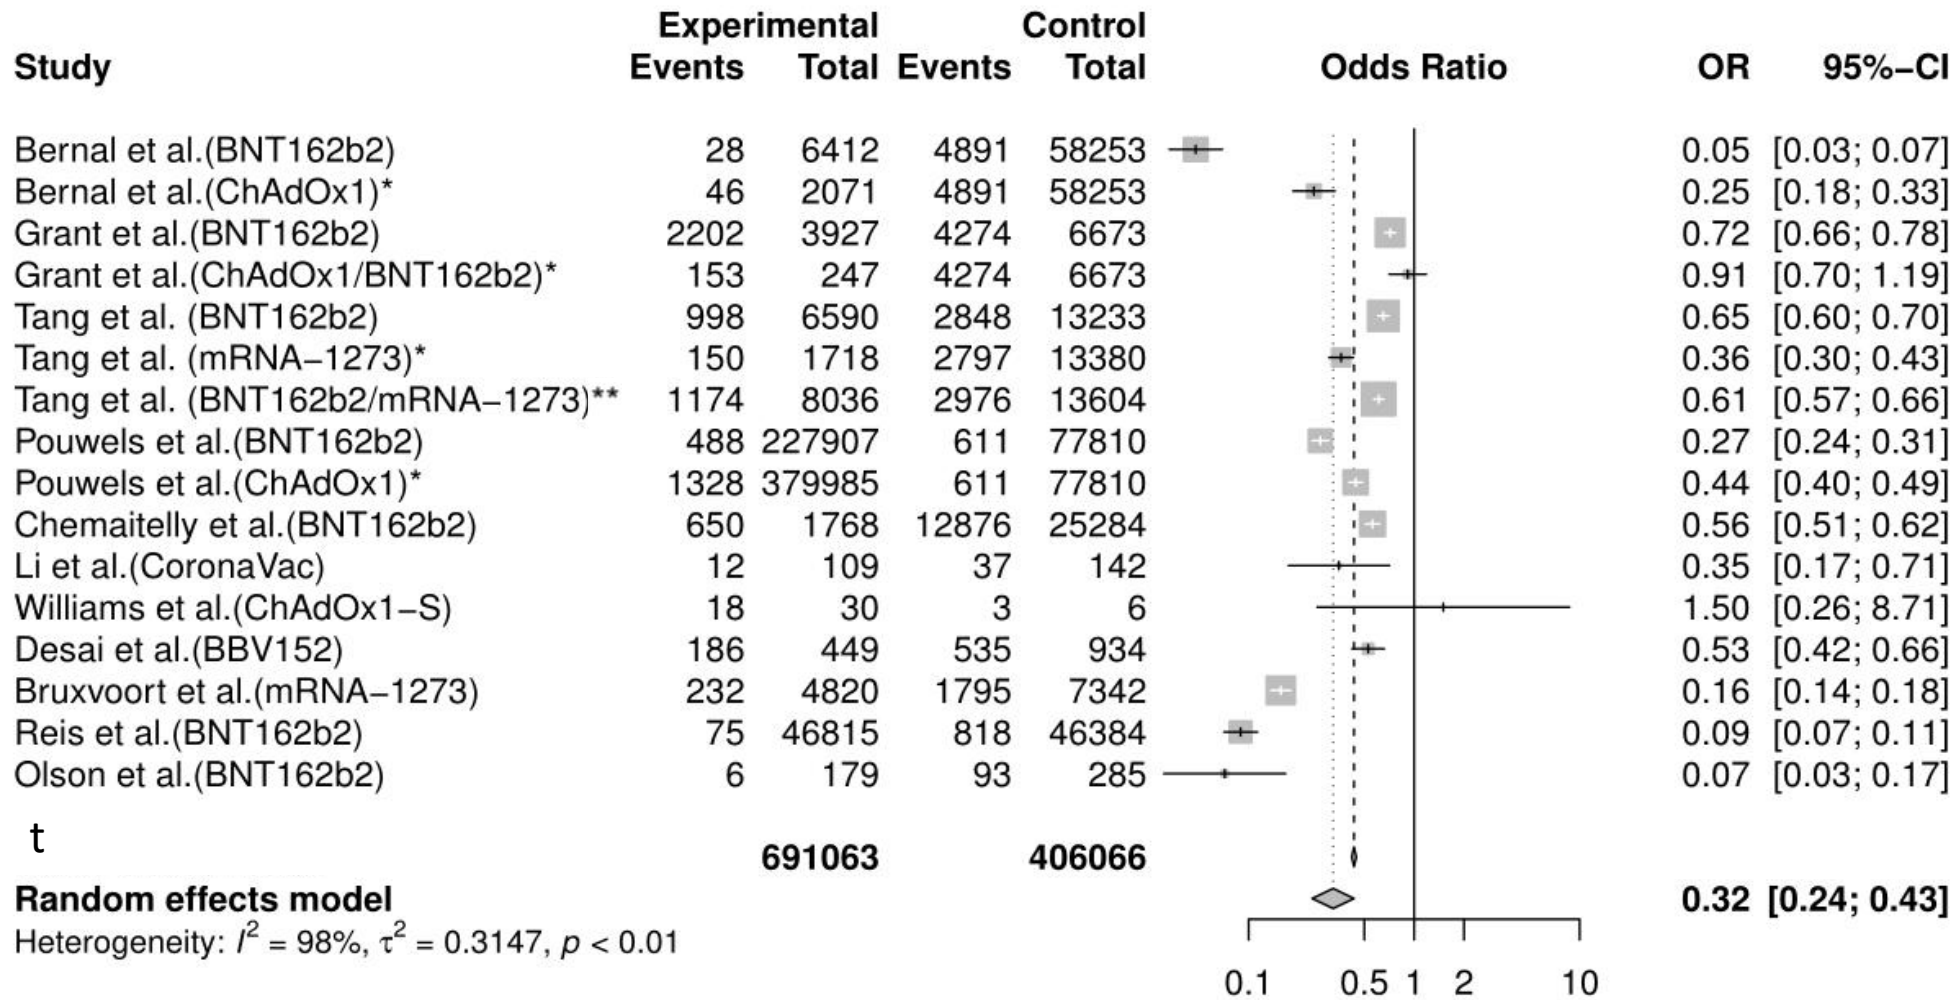

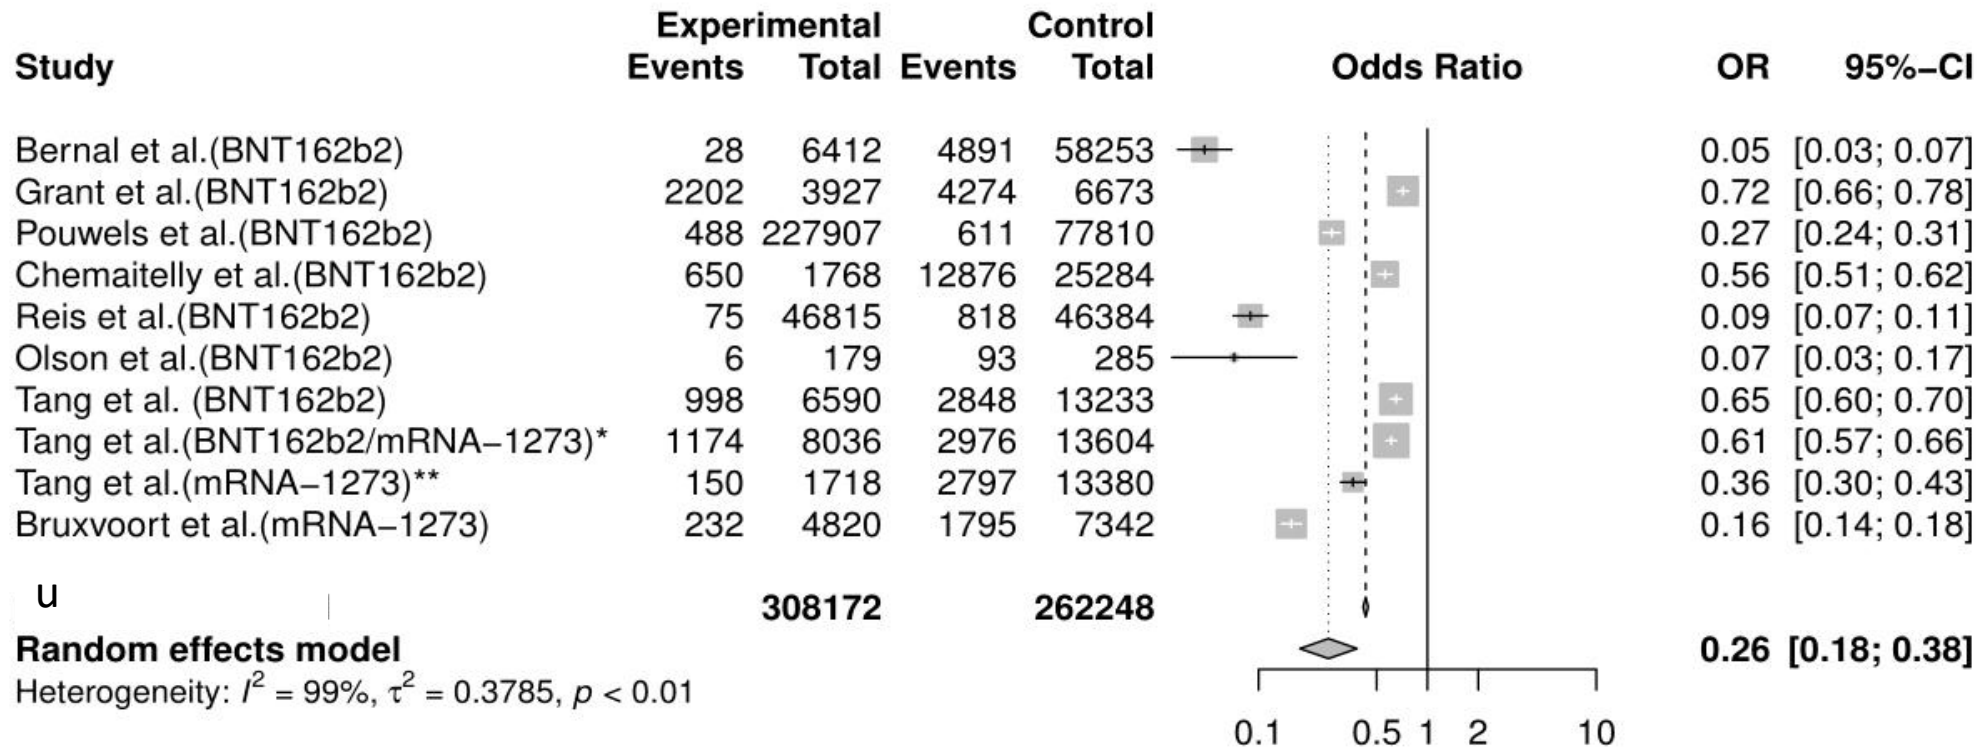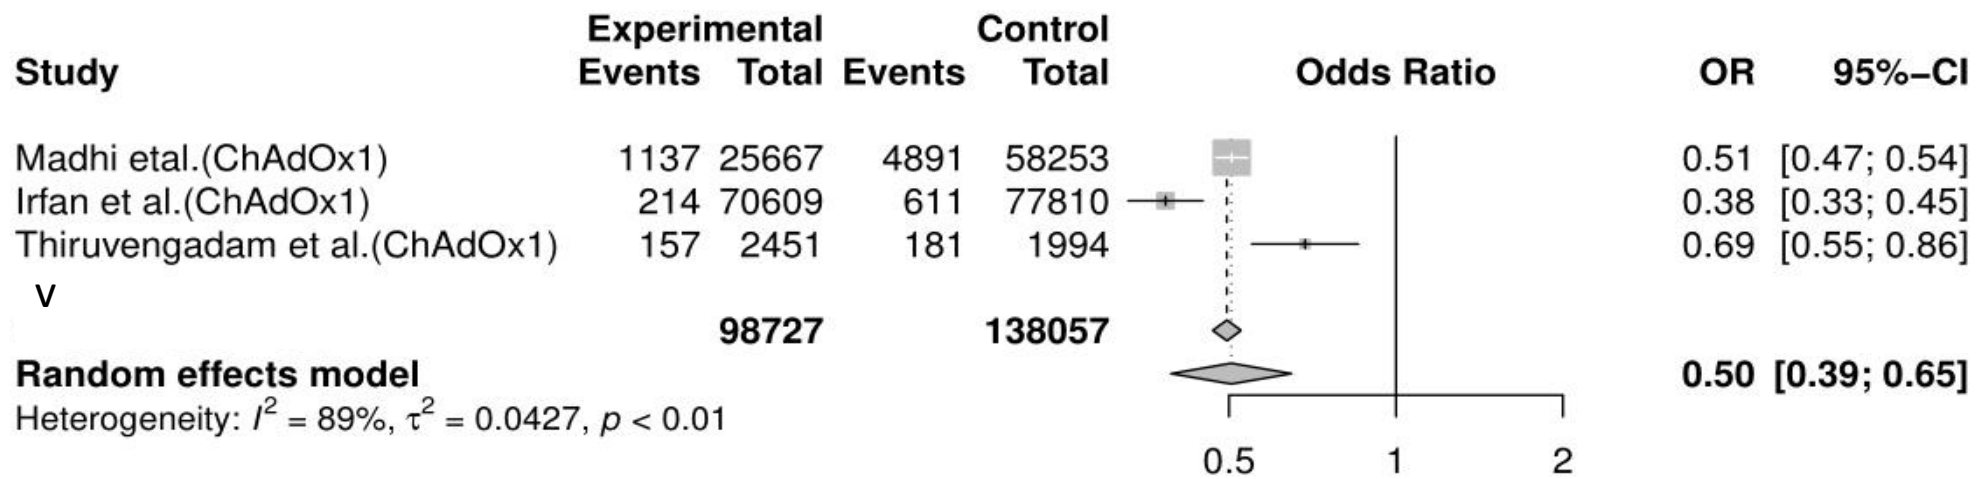

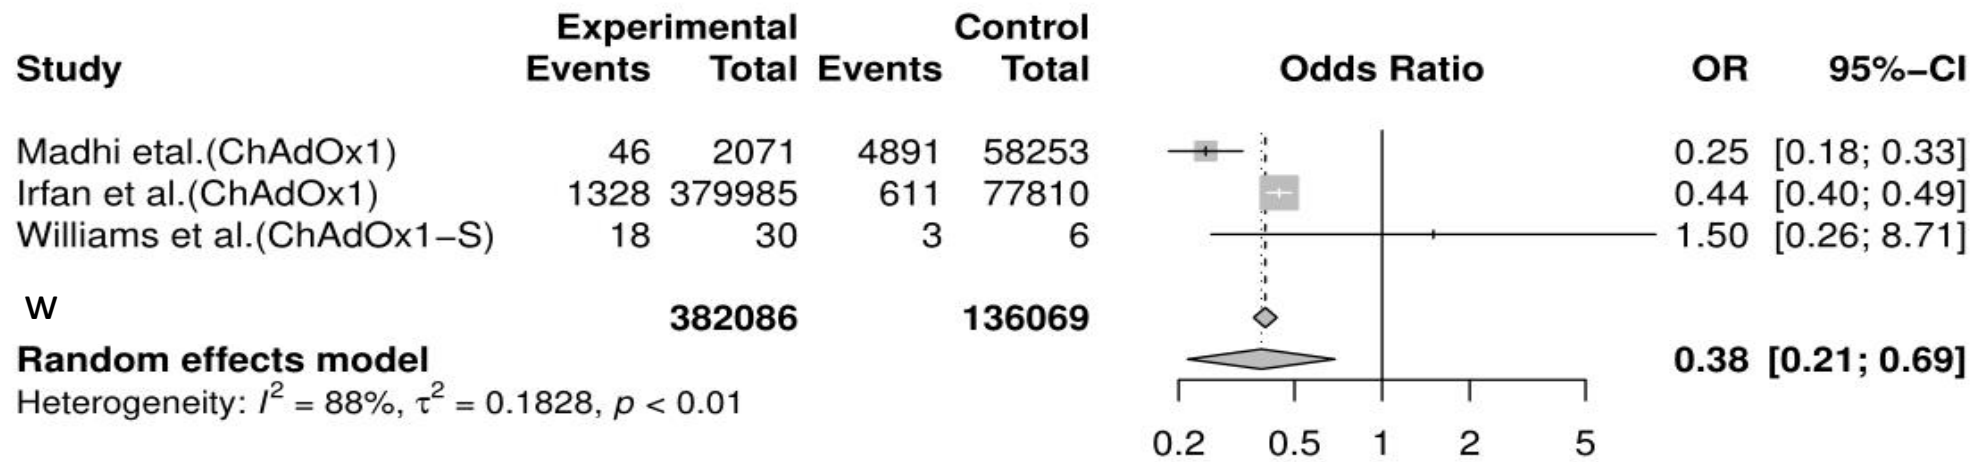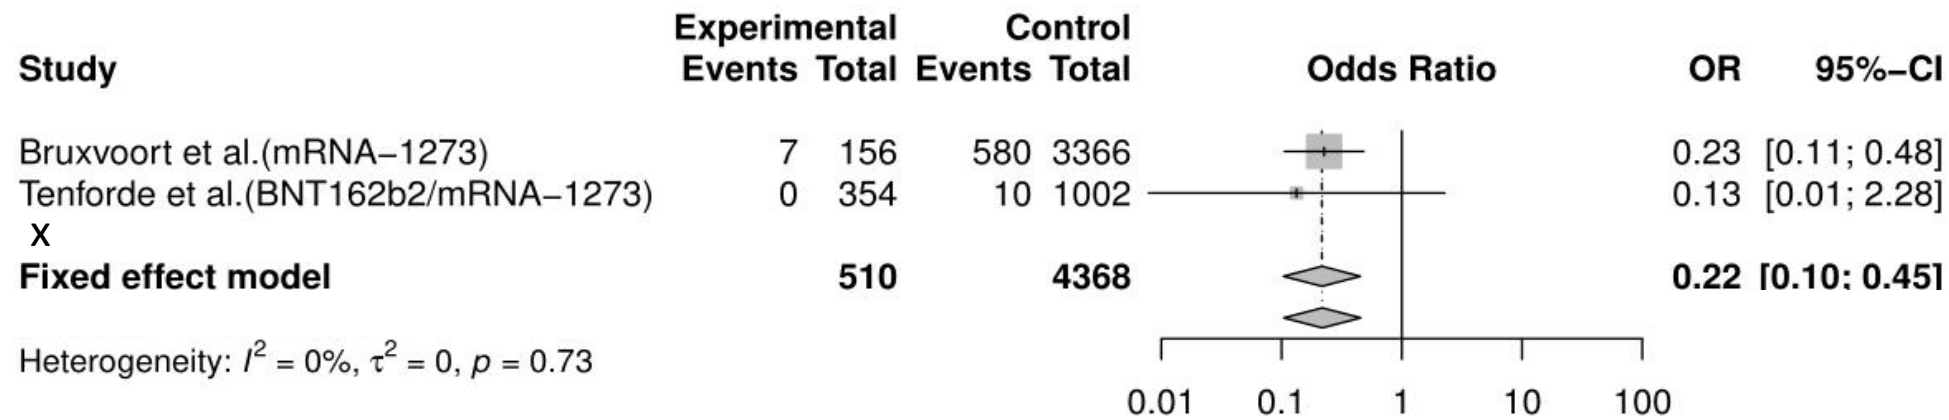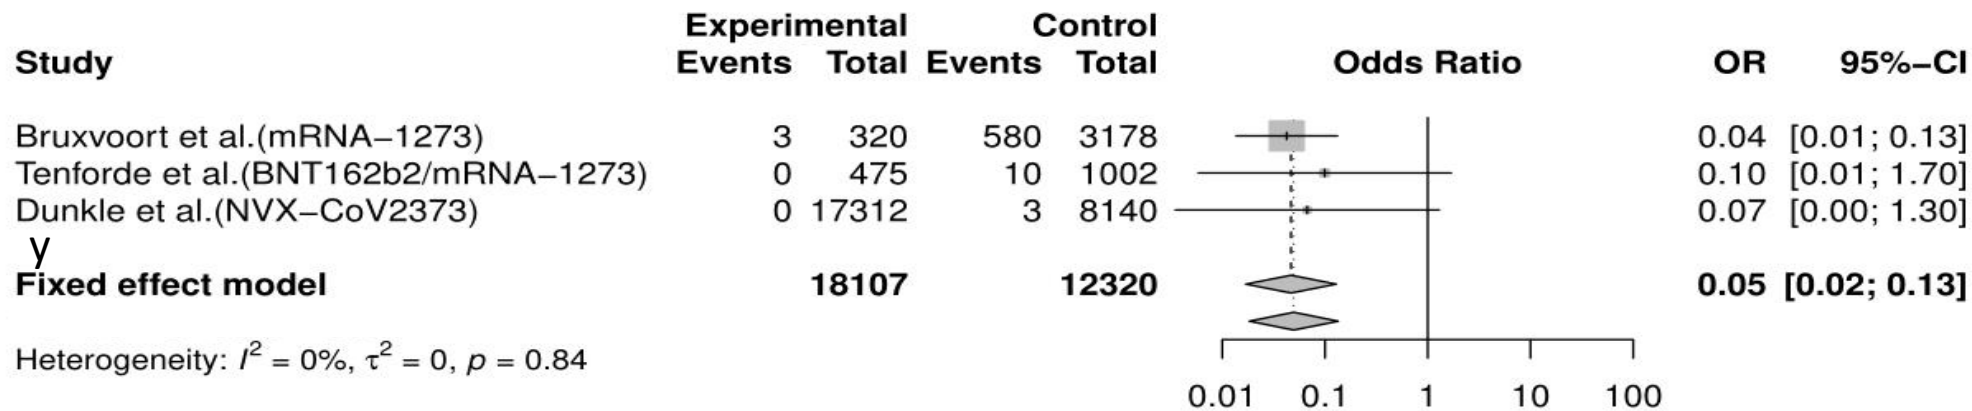

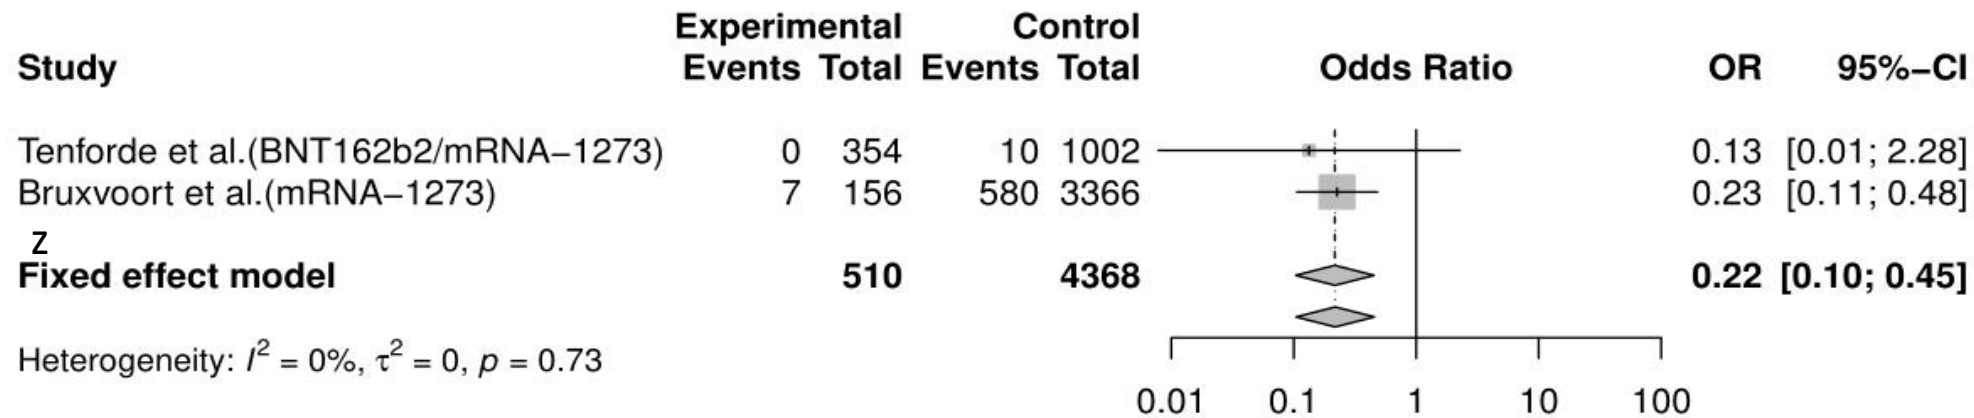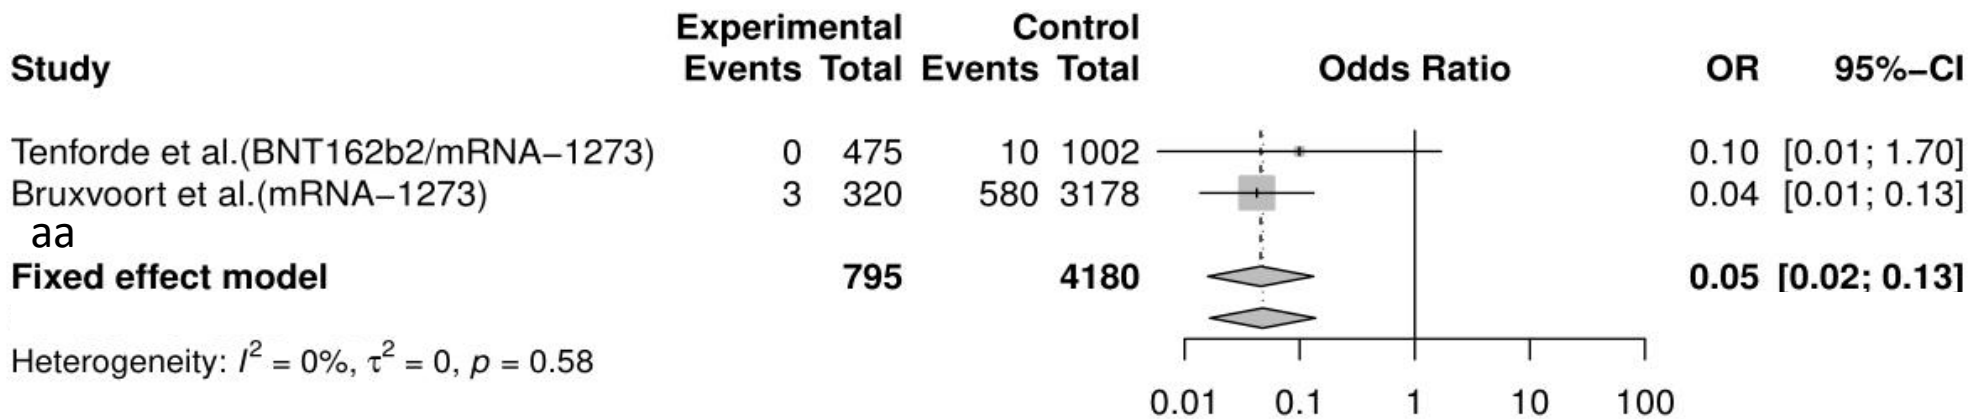

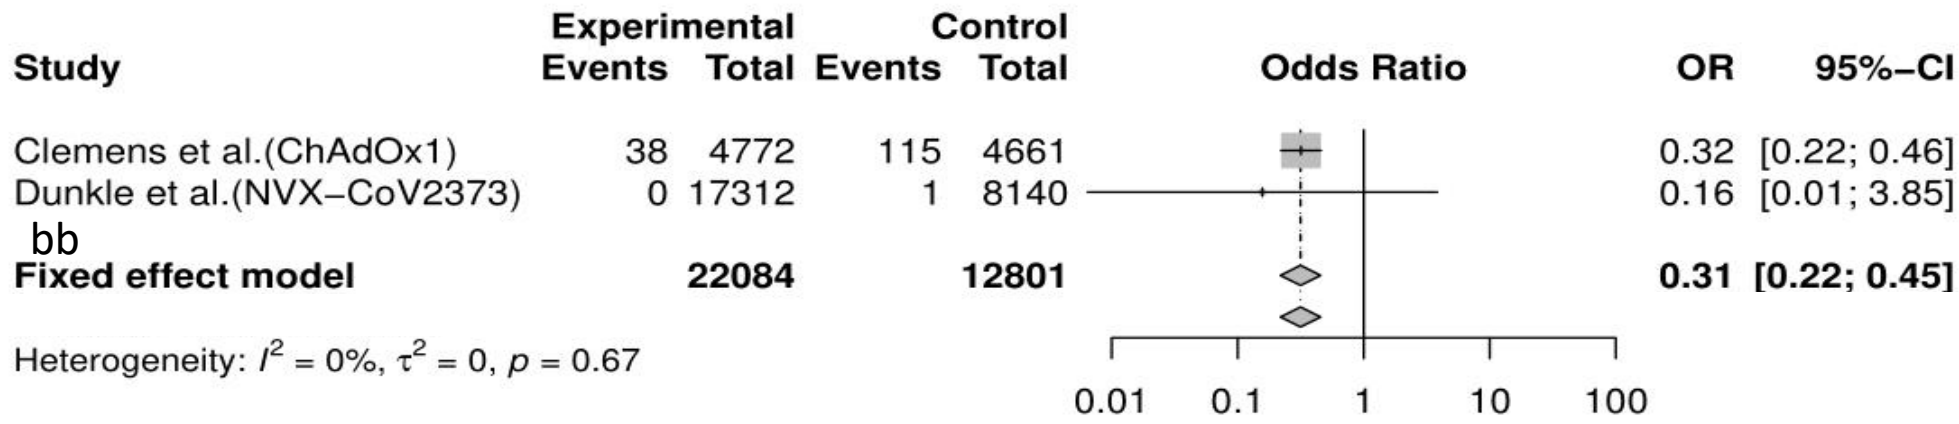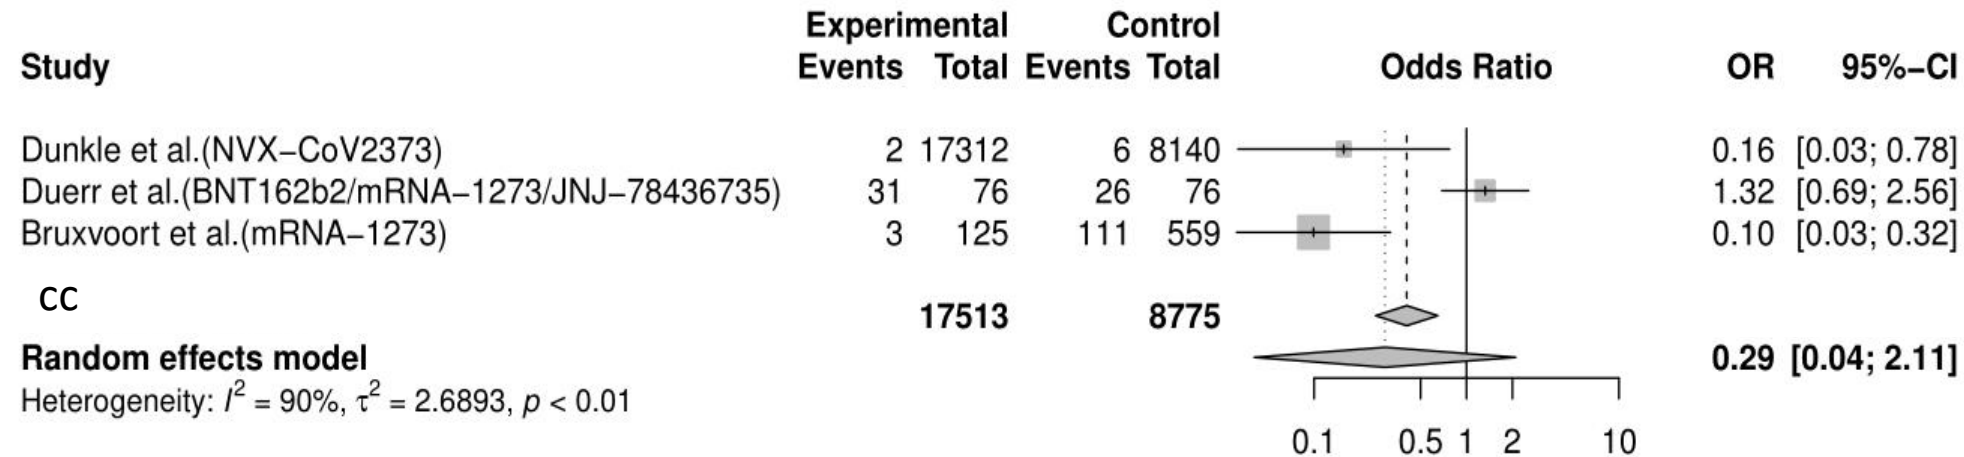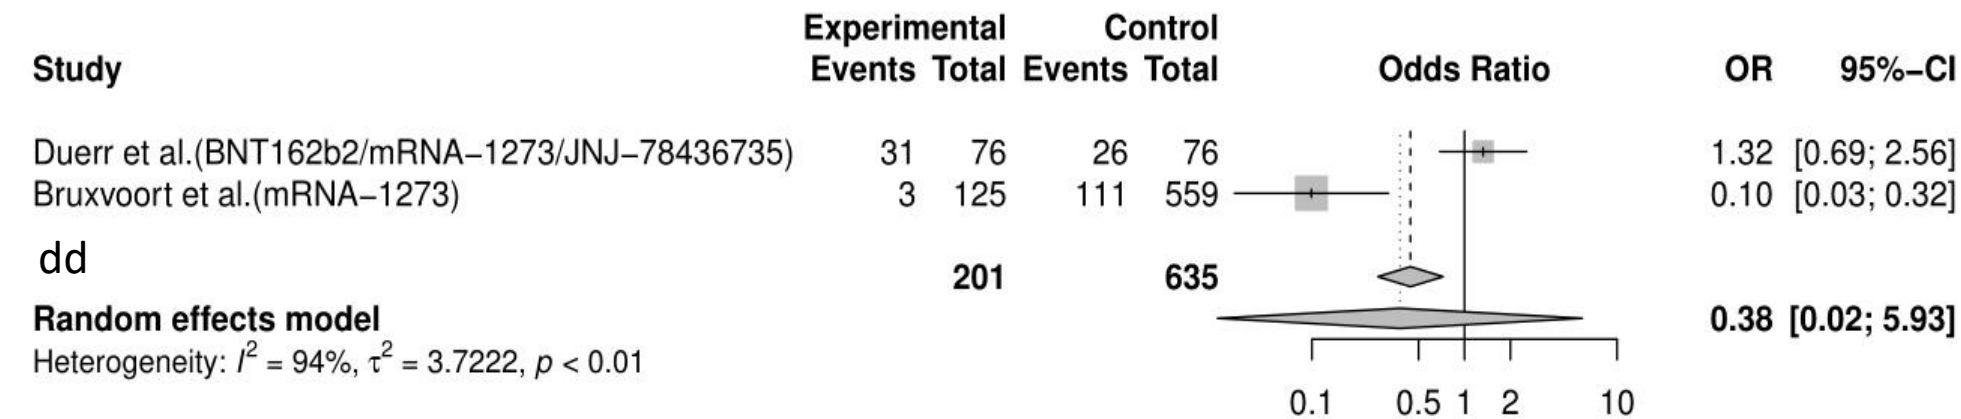

Supplement: Data_Sheet_2.pdf [file Data_Sheet_2.pdf]
