# Supplementary material for: Real-Word Effectiveness of Global COVID-19 Vaccines Against SARS-CoV-2 Variants: A Systematic Review and Meta-Analysis
Source: PubMed Central journal article supplement (PMC9160927; doi:10.3389/fmed.2022.820544), 2022-05-19
Supplement: Table_1.pdf [file Table_1.pdf]

## Supplementary table 1: Characteristics of the Studies included

| Study and Year         | Sample size | study design                                                         | Participating Countries | Age (Mean/Median and Range/SD) | Male (%)     | Vaccine Name ( dose)                                  | Vaccine Type                | Vaccine Developer | Comparator     | Characteristics of Vaccine Recipients      | Number of Scheduled Doses (Time of Inoculations) | Study Duration                              | Variants                    |
|------------------------|-------------|----------------------------------------------------------------------|-------------------------|--------------------------------|--------------|-------------------------------------------------------|-----------------------------|-------------------|----------------|--------------------------------------------|--------------------------------------------------|---------------------------------------------|-----------------------------|
| Madhi et al. 2021[20]  | 6326        | A multicenter, double-blind, randomized, controlled trial            | South Africa            | 30(18-65)                      | 1145(56.5%)  | ChAdOx1(A ZD1222)(5×10 <sup>10</sup> viral particles) | Virus-vectored vaccine      | AstraZeneca       | Saline placebo | HIV-negative adults                        | Prime and boost inoculation (0, 21-35 days)      | June 24 and November 9, 2020                | B.1.351 (501Y.V2)/D614G(B1) |
| Shinde et al. 2021[21] | 6324        | A randomized, observer-blinded, placebo-controlled, phase 2a–b trial | South Africa            | 32.0 (13.0)                    | 2518 (57.4%) | NVX-CoV2373(5 µg of recombinant spike protein)        | Recombinant subunit vaccine | Novavax           | Saline placebo | HIV-negative or stable HIV-positive adults | Prime and boost inoculation (0, 21 days)         | August 17, 2020, through November 25, 2020, | B.1.351 (501Y.V2)/D614G(B1) |

|                            |       |                                            |         |           |             |                                     |                               |                              |                                         |                               |                                           |                                      |                   |
|----------------------------|-------|--------------------------------------------|---------|-----------|-------------|-------------------------------------|-------------------------------|------------------------------|-----------------------------------------|-------------------------------|-------------------------------------------|--------------------------------------|-------------------|
| Hitchings et al. 2021[22]  | 1056  | A matched test-negative case-control study | Brazil  | 43.1 (NA) | 271(25.7%)  | CoronaVac (NA)                      | Inactivated vaccine           | Sinovac                      | Symptomatic and Asymptomatic population | Healthcare workers            | Prime and/or boost inoculation (NA)       | 19 January, 2021 to 25 March, 2021   | P.1 (B.1.1.28)    |
| Laith et al. 2021[23]      | 54338 | A test negative case-control study         | Qatar   | NA        | NA          | BNT162b2 (NA)                       | mRNA vaccine                  | Pfizer-BioNTech              | Unvaccinated Population                 | Persons In Qatar              | Prime and boost inoculation (0, ≥14 days) | December 21, 2020. to March 31, 2021 | B.1.1.7/B.1.351   |
| Bernal et al. 2021[24]     | 12675 | A test negative case control Study         | India   | NA        | 6200(48.9%) | BNT162b2(N A) /ChAdOx1(A ZD1222,NA) | mRNA/Virus - vectored vaccine | Pfizer-BioNTech /AstraZeneca | Unvaccinated Population                 | Persons in India              | Prime and boost inoculation (0, ≥21 days) | 17 May 2021 to 16 May 2021           | B.1.617.2/B.1.1.7 |
| Tiraboschi et al. 2021[25] | 6904  | A cross-sectional study                    | Italy   | NA        | NA          | BNT162b2 (NA)                       | mRNA vaccine                  | Pfizer-BioNTech              | Symptomatic and Asymptomatic population | Healthcare workers in Brescia | Prime and boost inoculation (0, 21 days)  | 25th January 2021 to 13th April 2021 | B.1.1.7/B1.525    |
| Hall et al.                | 23324 | A prospective                              | England | 46.1      | 3632(16     | BNT162b2                            | mRNA                          | Pfizer-Bio                   | Unvaccinat                              | Staff (aged ≥18               | Prime and                                 | Dec 7,                               | B.1.1.7           |

|                          |         |                                                         |                       |        |                  |                |                      |                        |                  |                                                     |                      |                                          |                               |                 |
|--------------------------|---------|---------------------------------------------------------|-----------------------|--------|------------------|----------------|----------------------|------------------------|------------------|-----------------------------------------------------|----------------------|------------------------------------------|-------------------------------|-----------------|
| 2021[26]                 |         |                                                         | cohort study          |        | (36.0–54.1)      | %              | (NA)                 | vaccine                | NTech            | ed                                                  | years) working       | boost                                    | 2020, to                      |                 |
|                          |         |                                                         |                       |        |                  |                |                      |                        |                  | Population                                          | in                   | inoculation (0,                          | Feb 5,                        |                 |
|                          |         |                                                         |                       |        |                  |                |                      |                        |                  |                                                     | publicly-funded      | <19 days)                                | 2021.                         |                 |
|                          |         |                                                         |                       |        |                  |                |                      |                        |                  |                                                     | hospitals            |                                          |                               |                 |
| Jacobson et al. 2021[27] | 189     | A                                                       | Cross-sectional study | USA    | 40.8 (11.2)      | 64 (33.9%)     | BNT162b2 (NA)        | mRNA vaccine           | Pfizer-Bio NTech | Infection with wild-type Or B.1.427/B.1.429         | Healthcare personnel | Prime and boost inoculation (NA)         | December 2020 to March 2021   | B.1.427/B.1.429 |
| Haas et al. 2021[28]     | 4714932 | An                                                      | observational study   | Israel | NA(16 and older) | 310788 (72.2%) | BNT162b2 (NA)        | mRNA vaccine           | Pfizer-Bio NTech | Unvaccinated Population                             | Residents in Israel  | Prime and boost inoculation (0, 21 days) | Jan 24 to April 3, 2021)      | B.1.1.7         |
| Emary et al. 2021[29]    | 520     | A single-blind, multicentre, randomised phase 2/3 trial |                       | UK     | NA(18 -55)       | 213 (41%)      | ChAdOx1(A ZD1222,NA) | Virus-vectored vaccine | AstraZeneca      | A meningococcal conjugate control (MenACWY) vaccine | Volunteers in UK     | Prime and boost inoculation (NA)         | Oct 1, 2020, and Jan 14, 2021 | B.1.1.7         |
| Bailly et al.            | 31      | An                                                      |                       | France | 87.0(8.2)        | 11             | BNT162b2(N           | mRNA                   | Pfizer-Bio       | Non-vaccin                                          | Residents            | Prime and                                | March                         | B.1.351         |

|                               |                               |        |           |             |                    |                     |                  |                          |                                                                     |                                     |                                    |                               |
|-------------------------------|-------------------------------|--------|-----------|-------------|--------------------|---------------------|------------------|--------------------------|---------------------------------------------------------------------|-------------------------------------|------------------------------------|-------------------------------|
| 2021[30]                      | observational cohort study    |        |           | (35.5%)     | A)                 | vaccine             | NTech            | ated residents           | in a nursing home                                                   | boost inoculation (NA)              | 8th to March 29th,                 | (501Y.V2)                     |
| Cavanaugh et al. 199 2021[31] | A case-control study          | USA    | NA(NA)    | NA          | BNT162b2(N A)      | mRNA vaccine        | Pfizer-Bio NTech | Unvaccinat ed Population | Health care personnel And residents in a skilled nursing facilities | Prime and/or boost inoculation (NA) | NA                                 | R.1                           |
| Kustin et al. 842 2021[32]    | A case-control study          | Israel | NA(>16)   | 320(40.4 %) | BNT162b2(N A)      | mRNA vaccine        | Pfizer-Bio NTech | Unvaccinat ed Population | Individuals in Clalit health services in Israel                     | Prime and/or boost inoculation (NA) | Decemb er 20, 2020- mid March 2021 | B.1.1.7/B.1. 351              |
| Magalis et al. 409 2021[33]   | An observational cohort study | USA    | 34.0(<35) | 40 (10%)    | BNT162b2(N A)      | mRNA vaccine        | Pfizer-Bio NTech | NA                       | Population in Alachua County, Florida                               | 2 standard doses (NA)               | Between February and March 2021    | B.1.1.7/B.1. 377/B.1.429 /B.1 |
| Faria et al. 142 2021[34]     | An observational              | Brazil | NA(NA)    | NA          | CoronaVac (600 SU) | Inactivated vaccine | Sinovac Life     | NA                       | Healthcare workers in São                                           | Prime and boost                     | From 23 February                   | P1, B.1.1.7, and              |

|                       |       |                                                     |              |             |              |                                       |                                 |                             |                               |                                                                                 |                                     |                                             |                   |
|-----------------------|-------|-----------------------------------------------------|--------------|-------------|--------------|---------------------------------------|---------------------------------|-----------------------------|-------------------------------|---------------------------------------------------------------------------------|-------------------------------------|---------------------------------------------|-------------------|
|                       |       |                                                     | cohort study |             |              |                                       |                                 | Sciences                    |                               | Paulo                                                                           | inoculation (0, 2-4weeks)           | ,2020 through 28 March, 2021                | B.1.351           |
| Irfan et al. 2021[35] | 2026  | A multicenter, randomized, placebo-controlled trial | South Africa | 30( 18-<65) | 115(57%)     | ChAdOx1(A ZD1222)(0.3 to 0.5 mL)      | Virus-vectored vaccine          | AstraZeneca                 | Placebo(0.9% sodium chloride) | Population had no or well-controlled chronic medical conditions                 | 2 standard doses (0, 21-35 days)    | NA                                          | B.1.351 (501Y.V2) |
| Grant et al.2021[36]  | 13728 | A nationwide case-control study                     | France       | NA(NA)      | 3940(31.2%)  | ChAdOx1(A ZD1222,NA) and BNT162b2(NA) | Virus-vectored and mRNA vaccine | AstraZeneca/Pfizer-BioNTech | Unvaccinated Population       | French population from Ipsos( a research and public opinion specialist company) | Prime boost and/or inoculation (NA) | Between 23 May and 13 August 2021           | B.1.617.2         |
| Tang et al. 2021[37]  | 56561 | A matched test-negative case-control study          | Qatar        | NA          | 35747(63.2%) | BNT162b2(NA), mRNA-1273 vaccine( NA)  | mRNA vaccine                    | Pfizer-BioNTech / Moderna   | Unvaccinated Population       | Qatar' population                                                               | Prime boost and/or inoculation (NA) | From 21 Decemb er 2020 to 7 Septemb er 2021 | B.1.617.2         |

|                        |    |         |                                                          |        |            |              |                                                            |                                     |                                        |                               |                                                                  |                                             |                                     |                   |
|------------------------|----|---------|----------------------------------------------------------|--------|------------|--------------|------------------------------------------------------------|-------------------------------------|----------------------------------------|-------------------------------|------------------------------------------------------------------|---------------------------------------------|-------------------------------------|-------------------|
| Rovida et al.2021[38]  | et | 3616    | An observational cohort study                            | Italy  | NA         | NA           | BNT162b2(N A)                                              | mRNA vaccine                        | Pfizer-Bio NTech                       | Unvaccinated                  | Healthcare workers of San Matteo hospital, Pavia, Italy          | 2 of standard doses (NA)                    | From January 18 to April 19 2021    | B.1.1.7           |
| Pouwels et al.2021[39] | et | 3565037 | An observational cohort study                            | UK     | NA         | NA           | BNT162b2(N A),ChAdOx1 (AZD1222,N A),mRNA-1273 vaccine( NA) | mRNA Vaccine/Virus-vectored vaccine | Pfizer-Bio NTech/ AstraZeneca /Moderna | Unvaccinated Population in UK | Population in UK                                                 | Prime or boost inoculation (NA)             | From Dec 1 2020 to August 2 2020    | B.1.1.7/B.1.617.2 |
| Trunfio et al.2021[40] | et | 6800    | An observational cohort study                            | Italy  | NA         | NA           | BNT162b2(N A)                                              | mRNA Vaccine                        | Pfizer-Bio NTech                       | NA                            | Healthcare workers in the entire health district Città di Torino | Prime or boost inoculation (NA)             | From Dec 27 2020 until April 1 2021 | B.1.1.7           |
| Heath et al.2021[41]   | et | 14039   | A randomized, observer-blinded, placebo-controlled trial | UK     | 56 (18–84) | 7238 (51.6%) | NVX-CoV2373(5 µg of recombinant Binant spike protein)      | Recombinant subunit vaccine         | Novavax                                | Saline placebo                | Adults in the United Kingdom                                     | Prime and boost inoculation (21 days apart) | From Sept 28 to Nov 28, 2020        | B.1.1.7           |
| Yi et al.2022[42]      |    | 58      | An observational cohort study                            | Korean | NA         | 16 (27.6%)   | BNT162b2(N A)                                              | mRNA Vaccine                        | Pfizer-Bio NTech                       | Unvaccinated Population       | Population in Korean                                             | Prime and boost inoculation                 | From August 3 to                    | B.1.617.2         |

|                              |        |   |                                          |        |    |               |                |                        |                 |                                            |                               |                                  |                     |                                            |                                         |                               |
|------------------------------|--------|---|------------------------------------------|--------|----|---------------|----------------|------------------------|-----------------|--------------------------------------------|-------------------------------|----------------------------------|---------------------|--------------------------------------------|-----------------------------------------|-------------------------------|
| Chemaitelly et al.2021[43]   | 486138 | A | matched test-negative case-control study | Qatar  | NA | 474306(68.0%) | BNT162b2(N A)  | mRNA Vaccine           | Pfizer-BioNTech | Unvaccinated Population in Qatar           | Population in Qatar           | Prime or boost inoculation (NA)  | (mean140days apart) | August 10 2021                             | from January 1 to September 5, 2021     | B.1.617.2, B.1.351, B.1.617.2 |
| Li et al.2021[44]            | 366    | A | test-negative case-control study         | China  | NA | 63 (41.2%)    | CoronaVac(N A) | inactivated vaccine    | NA              | Unvaccinated Population in Guanzhou, China | Population in Guanzhou, China | Prime or boost inoculation (NA)  |                     | From February 2 through May 1, 2021        | B.1.617.2                               |                               |
| Clemens et al.2021[45]       | 9433   | A | matched multi-centre study               | Brazil | NA | 4268(45.2%)   | ChAdOx1(N A)   | Virus-vectored vaccine | AstraZeneca     | Unvaccinated participants in Brazil        | Population in Brazil          | Prime and boost inoculation (NA) |                     | Between June 23, 2020 and December 1, 2020 | B.1.1.33, B.1.1.28, P.2, P.1, B.1.617.2 |                               |
| Thiruvengadam et al.2021[46] | 5143   | A | test-negative, case-control study        | India  | NA | 3430(66.7%)   | ChAdOx1(N A)   | Virus-vectored vaccine | AstraZeneca     | Unvaccinated participants in India         | Population in India           | Prime or boost inoculation (NA)  |                     | Between April 1, 2021, and May 31, 2021    | B.1.617.2                               |                               |

|                         |    |      |                                              |         |    |                |                                                |                               |                                             |                                                                            |                                                                   |                                                               |                                               |                                            |
|-------------------------|----|------|----------------------------------------------|---------|----|----------------|------------------------------------------------|-------------------------------|---------------------------------------------|----------------------------------------------------------------------------|-------------------------------------------------------------------|---------------------------------------------------------------|-----------------------------------------------|--------------------------------------------|
| Tenforde<br>al.2021[47] | et | 1831 | A multicenter<br>case-control<br>study       | US      | NA | 902(50.7<br>%) | BNT162b2(<br>NA),<br>mRNA-1273<br>vaccine( NA) | mRNA<br>vaccine               | Pfizer-Bio<br>NTech<br>/ Moderna            | Unvaccinat<br>ed<br>participants<br>in US                                  | Population<br>in<br>US                                            | Prime or boost<br>inoculation<br>(NA)                         | Form<br>March<br>11 to<br>May 5,<br>2021      | B.1.1.7, P.1,<br>B.1.429,<br>B.1.351, etc. |
| Williams<br>al.[48]     | et | 42   | An<br>observational<br>cohort study          | England | NA | 14(33.3%<br>)  | ChAdOx1-S(<br>NA)                              | Virus-<br>vectored<br>vaccine | AstraZene<br>ca                             | Unvaccinat<br>ed<br>population<br>in a<br>care home,<br>London,<br>England | Vaccinated<br>population in a<br>care home,<br>London,<br>England | Prime or boost<br>inoculation<br>(NA)                         | Since<br>summer<br>2020,                      | B.1.617.2                                  |
| Lefèvre<br>al.2021[49]  | et | 378  | An<br>observational<br>cohort study          | France  | NA | NA             | BNT162b2(N<br>A)                               | mRNA<br>vaccine               | Pfizer-Bio<br>NTech                         | NA                                                                         | Residents<br>in<br>longterm care<br>facilities in<br>France       | Prime<br>and<br>boost<br>inoculation<br>(NA)                  | Between<br>Jan 15<br>and<br>April 16,<br>2021 | B.1.351                                    |
| Desai<br>al.2021[50]    | et | 2136 | A test-negative,<br>case-control<br>study    | India   | NA | NA             | BBV152                                         | inactivated<br>vaccine        | Bharat<br>Biotech                           | Unvaccinat<br>ed<br>population<br>in India                                 | Population<br>in<br>India                                         | Prime<br>and<br>boost<br>inoculation<br>(at<br>least 14 days) | Between<br>April 15<br>and May<br>15, 2021    | B.1.617.2                                  |
| Duerr<br>al.2021[51]    | et | 152  | An<br>observational<br>case<br>control study | US      | NA | NA             | BNT162b2/m<br>RNA-1273/J<br>NJ-<br>78436735    | mRNA<br>vaccine               | Pfizer-Bio<br>NTech/M<br>oderna/Ja<br>nssen | Unvaccinat<br>ed<br>population<br>in New                                   | Population<br>in<br>New York City                                 | Prime<br>and<br>boost<br>inoculation<br>(NA)                  | Between<br>February<br>1 and<br>April 30,     | B.1.1.7,<br>B.1.526, P.1                   |



|                          |        |                                                                   |                              |              |               |             |                             |             |                                                                   |                                                                   |                                                   |                                                         |                                             |                                                                |
|--------------------------|--------|-------------------------------------------------------------------|------------------------------|--------------|---------------|-------------|-----------------------------|-------------|-------------------------------------------------------------------|-------------------------------------------------------------------|---------------------------------------------------|---------------------------------------------------------|---------------------------------------------|----------------------------------------------------------------|
| Bruxvoort et al.2021[52] | 48918  | A test negative case-control study.                               | UK                           | NA           | NA            | mRNA-1273   | mRNA vaccine                | Moderna     | York City                                                         | Test negative controls on age, sex, etc.                          | Adult Permanent Southern California (KPSC)members | Kaiser Prime and/or boost inoculation ( $\geq 14$ days) | From 1 March 2021 to 27 July 2021           | B.1.1.7, B.1.617.2, B.1.427, B.1.429, P.1, etc.                |
| Hitchings et al.2021[53] | 138673 | A matched, test-negative case-control study                       | Brazil                       | NA           | 63493(45.8%)  | ChAdOx1     | Virus-vectored vaccine      | AstraZeneca | Unvaccinated participants in Brazil                               | Older adults in São Paulo state, Brazil                           | Prime boost inoculation (NA)                      | and/or                                                  | From Oct 1, 2020 to July 2, 2021            | P.1                                                            |
| Dunkle et al.2021[54]    | 29949  | A phase 3, randomized, observer-blinded, placebo-controlled trial | the United States and Mexico | 47.0 (18–95) | 13181 (51.8%) | NVX-CoV2373 | Recombinant subunit vaccine | Novavax     | Adults receive two doses of placebo                               | Adults receive two doses of NVX-CoV2373                           | Prime boost inoculation ( $\geq 21$ days)         | and                                                     | Between Dec 27, 2020, and February 18, 2021 | B.1.1.7, B.1.351, B.1.526, P.1, B.1.429, B.1.617.1, P.2, B.1.2 |
| Ranzani et al.2021[55]   | 74363  | A test negative case-control study                                | Brazil                       | NA           | 34472(46.4%)  | CoronaVac   | Inactivated vaccine         | Sinovac     | Adults aged $\geq 70$ years who were residents of São Paulo state | Symptomatic covid-19 in the elderly population of São Paulo state | Prime boost inoculation (NA)                      | and/or                                                  | From 17 January 2021 to 29 April 2021       | P.1                                                            |

|                           |    |        |                                          |                  |            |                   |                        |                 |                                  |                                            |                                      |                                                       |                                                       |                     |
|---------------------------|----|--------|------------------------------------------|------------------|------------|-------------------|------------------------|-----------------|----------------------------------|--------------------------------------------|--------------------------------------|-------------------------------------------------------|-------------------------------------------------------|---------------------|
| Dickerman<br>al.2022[56]  | et | 439684 | A matched,<br>case-control<br>study      | US               | 69 (60–74) | 407452<br>(92.7%) | BNT162b2/m<br>RNA-1273 | mRNA<br>vaccine | Pfizer-Bio<br>NTech<br>/ Moderna | U.S.<br>Veterans                           | U.S. Veterans                        | Prime<br>inoculation<br>( NA)                         | Between<br>January<br>4<br>and May<br>14, 2021        | B.1.1.7             |
| Vignier<br>al.2021[57]    | et | 44     | An<br>observational<br>cohort study      | French<br>Guiana | NA         | 42(95.5%<br>)     | BNT162b2               | mRNA<br>vaccine | Pfizer-Bio<br>NTech              | Invaccinate<br>d gold<br>miners            | Vaccinated<br>gold miners            | Prime<br>and/or<br>boost<br>inoculation<br>( NA)      | Between<br>June 2,<br>2021<br>And<br>June<br>15, 2021 | P.1<br>(Gamma)      |
| Abu-Raddad<br>al.2021[58] | et | 295166 | A test-negative<br>case-control<br>study | Qatar            | NA         | NA                | BNT162b2               | mRNA<br>vaccine | Pfizer-Bio<br>NTech              | Invaccinate<br>d<br>population<br>in Qatar | Vaccinated<br>population in<br>Qatar | Prime<br>and/or<br>boost<br>inoculation ( 14<br>days) | From 1<br>February<br>to 31<br>March<br>2021          | B.1.1.7,<br>B.1.351 |
| Reis<br>al.2022[59]       | et | 188708 | A matched,<br>case-control<br>study      | Israel           | NA         | 92450(49<br>%)    | BNT162b2               | mRNA<br>vaccine | Pfizer-Bio<br>NTech              | Invaccinate<br>d<br>adolescents            | Vaccinated<br>adolescents            | Prime<br>and/or<br>boost<br>inoculation<br>( NA)      | Between<br>June 8<br>and<br>Septemb<br>er 14,<br>2021 | B.1.617.2           |
| Olson<br>al.2021[60]      | et | 464    | A test-negative,<br>case-control         | US               | 15(14-17)  | 253(55.7<br>%)    | BNT162b2               | mRNA<br>vaccine | Pfizer-Bio<br>NTech              | Invaccinate<br>d Persons                   | Vaccinated<br>Persons Aged           | Prime<br>and<br>boost                                 | During<br>June                                        | B.1.617.2           |

|                       |    |        |                                                  |                  |    |    |                      |                                        |                                     |                                             |                                       |                                        |                            |                                   |                                          |
|-----------------------|----|--------|--------------------------------------------------|------------------|----|----|----------------------|----------------------------------------|-------------------------------------|---------------------------------------------|---------------------------------------|----------------------------------------|----------------------------|-----------------------------------|------------------------------------------|
|                       |    |        | study                                            |                  |    |    |                      |                                        |                                     | Aged 12-18<br>Years                         | 12-18 Years                           | inoculation<br>( NA)                   | 1-Sept<br>mber 30,<br>2021 |                                   |                                          |
| Collie<br>al.2022[61] | et | 78173  | A test-negative,<br>case-control<br>study        | South<br>African | NA | NA | BNT162b2             | mRNA<br>vaccine                        |                                     | Invaccinate<br>d<br>population              | Vaccinated<br>populatio               | Prime<br>boost<br>inoculation<br>( NA) | and                        |                                   | B.1.1.529<br>(omicron)                   |
| Eyre<br>al.2022[62]   | et | 108498 | A retrospective<br>observational<br>cohort study | England          | NA | NA | ChAdOx1/B<br>NT162b2 | Virus-<br>Vectored/mR<br>NA<br>vaccine | AstraZene<br>ca/Pfizer-<br>BioNTech | Invaccinate<br>Populatio<br>n in<br>England | VaccinatePopul<br>ation in<br>England | Prime<br>boost<br>inoculation<br>( NA) | OR                         | NA                                | B.1.1.7<br>(Alpha)                       |
| Mor<br>al.2022[63]    | et | 3050   | A retrospective<br>observational<br>cohort study | Israel           | NA | NA | BNT162b2             | mRNA<br>vaccine                        | Pfizer-Bio<br>NTech                 | Invaccinate<br>Population<br>in Israel      | accinatePopula<br>tion in Israel      | Boost<br>inoculation<br>( NA)          |                            | During<br>winter<br>2020-20<br>21 | B.1.1.7(alph<br>a),<br>B.1.351(Bet<br>a) |
