# Supplementary material for: Real-Word Effectiveness of Global COVID-19 Vaccines Against SARS-CoV-2 Variants: A Systematic Review and Meta-Analysis
Source: PubMed Central journal article supplement (PMC9160927; doi:10.3389/fmed.2022.820544), 2022-05-19
Supplement: Table_2.pdf [file Table_2.pdf]

Supplementary table 2: Results of the Egger test, the heterogeneity test and the meta-analysis

| Groups                                                                  | No.of<br>studi<br>es | Egger test |        | Heterogeneity test |                |        | Results of the meta-analyses |                      |                               |    |
|-------------------------------------------------------------------------|----------------------|------------|--------|--------------------|----------------|--------|------------------------------|----------------------|-------------------------------|----|
|                                                                         |                      | t          | p      | I <sup>2</sup>     | τ <sup>2</sup> | p      | Model                        | Single-arm analysis* | Two-arm analysis <sup>#</sup> |    |
|                                                                         |                      |            |        |                    |                |        |                              |                      | OR                            | VE |
| Incidence of variants post first vaccine                                | 6                    | 1.86       | 0.12   | 100%               | 0.0351         | 0      | Random effect model          | 0.07[0.01;0.15]      |                               |    |
| Incidence of variants post second vaccine                               | 21                   | 4.32       | 0.0003 | 100%               | 0.0106         | 0      | Random effect model          | 0.03[0.02;0.04]      |                               |    |
| Incidence of variants post first mRNA vaccine                           | 4                    | 2.17       | 0.1618 | 100%               | 0.0478         | 0      | Random effect model          | 0.07[0.00; 0.21]     |                               |    |
| Incidence of variants post second mRNA vaccine                          | 10                   | 2.25       | 0.0548 | 100%               | 0.0062         | 0      | Random effect model          | 0.06[0.04; 0.09]     |                               |    |
| Incidence of variants post second viral vector vaccine                  | 4                    | 0.39       | 0.7358 | 93%                | 0.0011         | < 0.01 | Random effect model          | 0.02[0.01; 0.02]     |                               |    |
| Incidence of variants post second protein subunit vaccine               | 2                    | -          | -      | 99%                | 0.0044         | < 0.01 | Random effect model          | 0.03[0.00; 0.03]     |                               |    |
| Incidence of variants post second inactivated vaccine                   | 2                    | -          | -      | 96%                | 0.0196         | < 0.01 | Random effect model          | 0.37[0.19; 0.57]     |                               |    |
| Incidence of B.1.1.7(Alpha) variant post first vaccine                  | 11                   | 2.83       | 0.0142 | 100%               | 0.0089         | 0      | Random effect model          | 0.07[0.05; 0.10]     |                               |    |
| Incidence of B.1.1.7(Alpha) variant post second vaccine                 | 22                   | 3.32       | 0.0031 | 100%               | 0.0032         | 0      | Random effect model          | 0.04[0.03; 0.05]     |                               |    |
| Incidence of B.1.1.7(Alpha) variant post first mRNA vaccine             | 8                    | 3.29       | 0.0072 | 100%               | 2.1904         | 0      | Random effect model          | 0.16[0.15; 0.16]     |                               |    |
| Incidence of B.1.1.7(Alpha) variant post second mRNA vaccine            | 11                   | 1.98       | 0.0794 | 100%               | 0.0127         | 0      | Random effect model          | 0.09[0.06; 0.14]     |                               |    |
| Incidence of B.1.1.7(Alpha) variant post first viral vector vaccine     | 3                    | 1.58       | 0.3584 | 100%               | 0.0009         | 0      | Random effect model          | 0.10[0.07; 0.14]     |                               |    |
| Incidence of B.1.1.7(Alpha) variant post second viral vector vaccine    | 4                    | 2.10       | 0.1701 | 98%                | 0.0001         | 0      | Random effect model          | 0.00[0.00; 0.01]     |                               |    |
| Incidence of B.1.1.7(Alpha) variant post second protein subunit vaccine | 2                    | -          | -      | 86%                | 0.0001         | < 0.01 | Random effect model          | 0.00[0.00; 0.00]     |                               |    |
| Incidence of B.1.351 (Beta) variant post first vaccine                  | 4                    | 2.69       | 0.1147 | 100%               | 0.0986         | 0      | Random effect model          | 0.35[0.04; 0.66]     |                               |    |
| Incidence of B.1.351 (Beta) variant post second vaccine                 | 12                   | 3.40       | 0.0067 | 100%               | 0.0575         | 0      | Random effect model          | 0.09[0.03; 0.19]     |                               |    |
| Incidence of B.1.351 (Beta) variant post first mRNA vaccine             | 4                    | -1.21      | 0.3506 | 100%               | 0.0415         | < 0.01 | Random effect model          | 0.30[0.14; 0.50]     |                               |    |
| Incidence of B.1.351 (Beta) variant post second mRNA vaccine            | 6                    | -32.80     | <0.000 | 99%                | 0.0398         | < 0.01 | Random effect model          | 0.10[0.03; 0.22]     |                               |    |
| Incidence of B.1.351 (Beta) variant post second viral vector vaccine    | 2                    | -          | -      | 0                  | 0              | 0.35   | Fixed effect model           | 0.02[0.02; 0.03]     |                               |    |

|                                                                         |    |       |        |      |         |        |                     |                  |                  |                 |
|-------------------------------------------------------------------------|----|-------|--------|------|---------|--------|---------------------|------------------|------------------|-----------------|
| Incidence of B.1.351 (Beta) variant post second protein subunit vaccine | 2  | -     | -      | 98%  | 0.0041  | < 0.01 | Random effect model | 0.00[0.00; 0.02] |                  |                 |
| Incidence of P.1 (Gamma) variant post first vaccine                     | 10 | 0.63  | 0.5463 | 100% | 0.1408  | 0      | Random effect model | 0.14[0.02; 0.34] |                  |                 |
| Incidence of P.1 (Gamma) variant post second vaccine                    | 4  | -1.64 | 0.1995 | 85%  | 2.7929  | < 0.01 | Random effect model | 0.09[0.06; 0.16] |                  |                 |
| Incidence of P.1 (Gamma) variant post first mRNA vaccine                | 3  | 4.11  | 0.1518 | 94%  | 0.0338  | < 0.01 | Random effect model | 0.09[0.00; 0.26] |                  |                 |
| Incidence of P.1 (Gamma) variant post second mRNA vaccine               | 4  | 1.81  | 0.2126 | 95%  | 0.0231  | < 0.01 | Random effect model | 0.06[0.01; 0.16] |                  |                 |
| Incidence of P.1 (Gamma) variant post second inactivated vaccine        | 3  | -0.38 | 0.7672 | 99%  | 0.0079  | < 0.01 | Random effect model | 0.36[0.26; 0.46] |                  |                 |
| Incidence of P.1 (Gamma) variant post second viral vector vaccine       | 2  | -     | -      | 100% | 7.2064  | < 0.01 | Random effect model | 0.05[0.00; 0.67] |                  |                 |
| Incidence of B.1.617.2(Delta) variant post first vaccine                | 12 | 3.51  | 0.0032 | 100% | 0.0132  | 0      | Random effect model | 0.14[0.11; 0.18] |                  |                 |
| Incidence of B.1.617.2(Delta) variant post second vaccine               | 11 | 2.59  | 0.0236 | 100% | 0.0095  | 0      | Random effect model | 0.08[0.05; 0.11] |                  |                 |
| Incidence of B.1.617.2(Delta) variant post first mRNA vaccine           | 9  | 2.29  | 0.0619 | 100% | 0.0356  | 0      | Random effect model | 0.09[0.03; 0.18] |                  |                 |
| Incidence of B.1.617.2(Delta) variant post second mRNA vaccine          | 8  | 2.16  | 0.0629 | 100% | 0.0154  | 0      | Random effect model | 0.09[0.05; 0.14] |                  |                 |
| Incidence of B.1.617.2(Delta) variant post first viral vector vaccine   | 3  | 84.31 | 0.0076 | 99%  | 0.0089  | < 0.01 | Random effect model | 0.06[0.02; 0.14] |                  |                 |
| Incidence of B.1.617.2(Delta) variant post second viral vector vaccine  | 3  | 0.95  | 0.5147 | 100% | 0.0126  | 0      | Random effect model | 0.03[0.00; 0.09] |                  |                 |
| Incidence of B.1.427(Epsilon) variant post first vaccine                | 3  | 0.56  | 0.6762 | 97%  | 3.5517  | < 0.01 | Random effect model | 0.00[0.00; 0.04] |                  |                 |
| Incidence of B.1.427(Epsilon) variant post second vaccine               | 5  | 0.34  | 0.7577 | 83%  | 5.8885  | < 0.01 | Random effect model | 0.00[0.00; 0.01] |                  |                 |
| Incidence of B.1.427(Epsilon) variant post first mRNA vaccine           | 3  | 0.56  | 0.6762 | 97%  | 3.5517  | < 0.01 | Random effect model | 0.00[0.00; 0.04] |                  |                 |
| Incidence of B.1.427(Epsilon) variant post second mRNA vaccine          | 2  | -     | -      | 0%   | 1.5772  | 1.00   | Fixed effect model  | 0.00[0.00; 0.04] |                  |                 |
| Incidence of P.2 (Zeta) variant post second vaccine                     | 2  | -     | -      | 0%   | 21.5506 | 1.00   | Fixed effect model  | 0.00[0.00; 0.22] |                  |                 |
| Incidence of B.1.526 (Iota) variant post second vaccine                 | 2  | -     | -      | 99%  | 19.6635 | < 0.01 | Random effect model | 0.01[0.00; 0.80] |                  |                 |
| Incidence of B.1.526 (Iota) variant post second mRNA vaccine            | 2  | -     | -      | 96%  | 2.7961  | < 0.01 | Random effect model | 0.12[0.01; 0.59] |                  |                 |
| Efficacy of vaccines against variants post first dose                   | 5  | -0.63 | 0.5617 | 98%  | 0.1213  | < 0.01 | Random effect model |                  | 0.60[0.58;0.62]  | 0.40[0.38;0.42] |
| Efficacy of vaccines against variants post second dose                  | 14 | 3.26  | 0.0062 | 100% | 3.7957  | 0      | Random effect model |                  | 0.04[0.02;0.07]  | 0.96[0.93;0.98] |
| Efficacy of mRNA vaccine against variants post first dose               | 3  | -0.81 | 0.5682 | 95%  | 0.0583  | < 0.01 | Random effect model |                  | 0.65[0.49; 0.87] | 0.35[0.13;0.51] |
| Efficacy of mRNA vaccine against variants post second dose              | 7  | 2.25  | 0.0548 | 100% | 4.3658  | 0      | Random effect model |                  | 0.15[0.03; 0.72] | 0.85[0.28;0.97] |
| Efficacy of viral vector vaccine against variants post second dose      | 4  | 0.02  | 0.9862 | 76%  | 0.0984  | < 0.01 | Random effect model |                  | 0.34[0.23; 0.49] | 0.66[0.51;0.77] |
| Efficacy of vaccines against B.1.1.7(Alpha) variant post first dose     | 9  | 1.80  | 0.1028 | 100% | 1.1959  | 0      | Random effect model |                  | 0.34[0.18; 0.64] | 0.66[0.36;0.82] |

|                                                                                    |    |       |        |      |         |        |                     |                  |                 |
|------------------------------------------------------------------------------------|----|-------|--------|------|---------|--------|---------------------|------------------|-----------------|
| Efficacy of vaccines against B.1.1.7(Alpha) variant post second dose               | 18 | 4.06  | 0.0007 | 100% | 2.8773  | 0      | Random effect model | 0.10[0.05; 0.21] | 0.90[0.79;0.95] |
| Efficacy of mRNA vaccine against B.1.1.7(Alpha) variant post first dose            | 8  | 1.76  | 0.1283 | 100% | 2.1904  | 0      | Random effect model | 0.36[0.13; 1.00] | 0.64[0.00;0.87] |
| Efficacy of mRNA vaccine against B.1.1.7(Alpha) variant post second dose           | 13 | 3.48  | 0.0052 | 100% | 2.5342  | 0      | Random effect model | 0.11[0.05; 0.26] | 0.89[0.74;0.95] |
| Efficacy of subunit vaccine against B.1.1.7(Alpha) variant post second dose        | 2  | -     | -      | 7%   | 0.0160  | 0.30   | Fixed effect model  | 0.11[0.06; 0.20] | 0.89[0.80;0.94] |
| Efficacy of viral vector vaccine against B.1.1.7(Alpha) variant post second dose   | 4  | 1.42  | 0.2916 | 100% | 11.6941 | < 0.01 | Random effect model | 0.06[0.00; 1.70] | 0.94[0.30;1.00] |
| Efficacy of vaccines against B.1.351(Beta) variant post first dose                 | 4  | 1.52  | 0.2686 | 0%   | 0       | 0.47   | Fixed effect model  | 0.84[0.80; 0.89] | 0.16[0.11;0.20] |
| Efficacy of vaccines against B.1.351(Beta) variant post second dose                | 9  | 0.97  | 0.3640 | 97%  | 0.7131  | < 0.01 | Random effect model | 0.58[0.30; 1.12] | 0.42[0.00;0.70] |
| Efficacy of mRNA vaccine against B.1.351(Beta) variant post first dose             | 4  | 1.52  | 0.2686 | 0%   | 0       | 0.47   | Fixed effect model  | 0.84[0.80; 0.89] | 0.16[0.11;0.20] |
| Efficacy of mRNA vaccine against B.1.351(Beta) variant post second dose            | 6  | 1.04  | 0.3577 | 98%  | 0.7275  | < 0.01 | Random effect model | 0.60[0.28; 1.28] | 0.40[0.00;0.72] |
| Efficacy of vaccines against P.1 (Gamma) variant post first dose                   | 5  | -0.48 | 0.6639 | 99%  | 0.1037  | < 0.01 | Random effect model | 0.65[0.44; 0.95] | 0.35[0.05;0.56] |
| Efficacy of vaccines against P.1 (Gamma) variant post second dose                  | 8  | -1.05 | 0.3345 | 86%  | 0.0486  | < 0.01 | Random effect model | 0.39[0.30; 0.50] | 0.61[0.50;0.70] |
| Efficacy of mRNA vaccine against P.1 (Gamma) variant post first dose               | 3  | 3.09  | 0.1996 | 23%  | 0.1379  | 0.27   | Fixed effect model  | 0.43[0.19; 0.95] | 0.57[0.05;0.81] |
| Efficacy of mRNA vaccine against P.1 (Gamma) variant post second dose              | 4  | 2.18  | 0.1605 | 85%  | 2.7929  | < 0.01 | Random effect model | 0.32[0.05; 1.99] | 0.68[0.00;0.95] |
| Efficacy of viral vector vaccine against P.1 (Gamma) variant post second dose      | 2  | -     | -      | 74%  | 0.1226  | 0.05   | Random effect model | 0.43[0.25; 0.75] | 0.57[0.25;0.75] |
| Efficacy of vaccines against B.1.617.2(Delta) variant post first dose              | 12 | 0.18  | 0.8630 | 98%  | 0.3453  | < 0.01 | Random effect model | 0.62[0.45; 0.85] | 0.38[0.15;0.55] |
| Efficacy of vaccines against B.1.617.2(Delta) variant post second dose             | 12 | -1.02 | 0.3233 | 98%  | 0.3147  | < 0.01 | Random effect model | 0.32[0.24; 0.43] | 0.68[0.57;0.76] |
| Efficacy of mRNA vaccine against B.1.617.2(Delta) variant post second dose         | 8  | -2.17 | 0.0617 | 99%  | 0.3785  | < 0.01 | Random effect model | 0.26[0.18; 0.38] | 0.74[0.62;0.82] |
| Efficacy of viral vector vaccine against B.1.617.2(Delta) variant post first dose  | 3  | -0.14 | 0.9121 | 89%  | 0.0427  | < 0.01 | Random effect model | 0.50[0.39; 0.65] | 0.50[0.35;0.61] |
| Efficacy of viral vector vaccine against B.1.617.2(Delta) variant post second dose | 3  | 1.14  | 0.4590 | 88%  | 0.1828  | < 0.01 | Random effect model | 0.38[0.21; 0.69] | 0.62[0.31;0.79] |
| Efficacy of vaccines against B.1.427(Epsilon) variant post first dose              | 2  | -     | -      | 0%   | 0       | 0.73   | Fixed effect model  | 0.22[0.10; 0.46] | 0.78[0.54;0.90] |
| Efficacy of vaccines against B.1.427(Epsilon) variant post second dose             | 3  | -1.82 | 0.3195 | 0%   | 0       | 0.84   | Fixed effect model  | 0.05[0.02; 0.13] | 0.95[0.87;0.98] |

|                                                                            |   |       |        |     |        |        |                     |                  |                 |
|----------------------------------------------------------------------------|---|-------|--------|-----|--------|--------|---------------------|------------------|-----------------|
| Efficacy of mRNA vaccine against B.1.427(Epsilon) variant post first dose  | 2 | -     | -      | 0%  | 0      | 0.73   | Fixed effect model  | 0.22[0.10; 0.46] | 0.78[0.54;0.90] |
| Efficacy of mRNA vaccine against B.1.427(Epsilon) variant post second dose | 2 | -     | -      | 0%  | 0      | 0.58   | Fixed effect model  | 0.05[0.02; 0.14] | 0.95[0.86;0.98] |
| Efficacy of vaccines against P.2(Zeta) variant post second dose            | 2 | -     | -      | 0%  | 0      | 0.67   | Fixed effect model  | 0.31[0.22; 0.45] | 0.69[0.55;0.78] |
| Efficacy of vaccines against B.1.526 (Iota) variant post second dose       | 3 | -0.17 | 0.8913 | 90% | 2.6893 | < 0.01 | Random effect model | 0.29[0.04; 2.11] | 0.71[0.00;0.96] |
| Efficacy of mRNA vaccines against B.1.526 (Iota) variant post second dose  | 2 | -     | -      | 94% | 3.7222 | < 0.01 | Random effect model | 0.38[0.02; 5.93] | 0.62[0.00;0.98] |

OR: Odds ratio, VE: Vaccine effectiveness
